# Supplementary material for: Investigation on the Conserved MicroRNA Genes in Higher Plants
Source: Springer Nature journal article supplement (doi:10.1007/s11105-020-01228-9), 2020-06-15
Supplement: 11105_2020_1228_MOESM2_ESM.xlsx [file 11105_2020_1228_MOESM2_ESM.xlsx]

## Sheet: TE
Table S2: The pre-miRNA sequences associated with Transposon and/or retrotransposon elements
Name	From	To	Name	From	To	Class	Dir	Sim	Pos/Mm:Ts	Score
osa-miR1044	15	150	AT9TSD1	936	1049	DNA/MuDR	c	0.7417	1.4667	217
osa-miR1118a	1	232	STOWAWAY21_OS	4	242	DNA	d	0.8584	1.6111	1343
osa-miR1118b	1	141	STOWAWAY15_OS	2	142	DNA	c	0.7887	1.4	722
osa-miR1120a.1	1	138	STOWAWAY1_OS	5	143	DNA	c	0.8561	1.7273	844
osa-miR1120a.2	1	125	STOWAWAY1_OS	7	145	DNA	d	0.811	1.8333	592
osa-miR1120aa	1	138	STOWAWAY1_OS	5	143	DNA	c	0.8273	1.6429	774
osa-miR1120b.1	29	106	STOWAWAY50_OS	7	82	DNA	c	0.8571	1.25	456
osa-miR1120b.2	35	110	STOWAWAY50_OS	7	82	DNA	c	0.8947	1.6	510
osa-miR1120b.3	1	34	STOWAWAY50_OS	9	42	DNA	d	0.8824	4	221
osa-miR1120b.3	41	114	STOWAWAY50_OS	7	80	DNA	c	0.8919	2	486
osa-miR1120c	1	229	STOWAWAY21_OS	7	239	DNA	d	0.8966	1.1333	1496
osa-miR1120d.1	1	90	TREP219	5	94	DNA/Mariner	c	0.9556	1	765
osa-miR1120d.2	1	73	TREP219	5	94	DNA/Mariner	c	0.9459	1	527
osa-miR1120e	1	140	STOWAWAY1_OS	5	143	DNA	c	0.8214	2.1818	727
osa-miR1120f	1	90	TREP219	5	94	DNA/Mariner	c	0.9333	1.2	725
osa-miR1120g	1	228	STOWAWAY21_OS	5	240	DNA	c	0.8559	1.381	1331
osa-miR1120h	1	214	STOWAWAY21_OS	5	237	DNA	c	0.8796	1.2353	1291
osa-miR1120i	1	208	STOWAWAY21_OS	5	237	DNA	c	0.8598	1.3333	1179
osa-miR1120j	1	140	STOWAWAY1_OS	5	143	DNA	c	0.8214	2	739
osa-miR1120k	1	80	STOWAWAY50_OS	9	88	DNA	d	0.825	1.4	441
osa-miR1120k	83	116	STOWAWAY27_OS	5	38	DNA	c	0.8529	1.6667	201
osa-miR1120l	1	96	TREP220	9	103	DNA	d	0.8438	1.75	604
osa-miR1120m	1	90	TREP219	7	96	DNA/Mariner	d	0.8571	1.5714	573
osa-miR1120n.1	1	90	TREP219	7	96	DNA/Mariner	d	0.9556	1	764
osa-miR1120n.2	1	90	TREP219	7	96	DNA/Mariner	d	0.9111	1.1429	694
osa-miR1120o.1	1	104	MIDWAY	463	551	DNA/EnSpm/CACTA	d	0.8667	1.375	524
osa-miR1120o.2	4	96	MIDWAY	461	547	DNA/EnSpm/CACTA	c	0.8182	1.3636	468
osa-miR1120p	1	88	TREP219	7	96	DNA/Mariner	d	0.9101	1.1667	660
osa-miR1120q	28	95	STOWAWAY15-2_OS	5	72	DNA	c	0.8824	1.3333	484
osa-miR1120r	1	101	TREP220	7	101	DNA	c	0.7708	1.3077	389
osa-miR1120s	2	91	TREP219	8	96	DNA/Mariner	d	0.9	1.3333	646
osa-miR1120t	1	124	STOWAWAY47_OS	9	142	DNA	d	0.7578	1.5294	456
osa-miR1120u	1	75	TREP219	5	94	DNA/Mariner	c	0.8442	1.4286	392
osa-miR1120v	1	117	STOWAWAY50_OS	7	166	DNA	c	0.8729	1.5556	575
osa-miR1120w	1	127	STOWAWAY1_OS	7	145	DNA	d	0.8154	1.75	610
osa-miR1120x	1	90	TREP219	7	96	DNA/Mariner	d	0.9889	1	810
osa-miR1120y	15	230	STOWAWAY21_OS	17	239	DNA	d	0.8219	2.2667	1021
osa-miR1120z	1	227	STOWAWAY21_OS	7	239	DNA	d	0.8485	1.8667	1222
osa-miR1127a	6	244	STOWAWAY21_OS	1	243	DNA	d	0.8025	1.6957	1029
osa-miR1127aa	4	108	EnSpm-11_OS	6198	6303	DNA/EnSpm/CACTA	c	0.8491	1.25	704
osa-miR1127ab	3	245	STOWAWAY51_OS	1	242	DNA/Mariner	d	0.9136	1.6667	1810
osa-miR1127ac	6	237	STOWAWAY21_OS	1	243	DNA	c	0.8504	2.0625	1324
osa-miR1127ad	6	241	STOWAWAY21_OS	1	243	DNA	c	0.9163	1.3077	1700
osa-miR1127ae	6	242	STOWAWAY21_OS	1	243	DNA	d	0.8506	1.8125	1308
osa-miR1127b	6	103	TREP219	1	100	DNA/Mariner	d	0.94	1	790
osa-miR1127c	6	105	TREP219	1	100	DNA/Mariner	c	0.97	1	877
osa-miR1127d	4	152	STOWAWAY47_OS	1	148	DNA	d	0.8121	2.25	740
osa-miR1127e	4	238	STOWAWAY44_OS	1	236	DNA	d	0.8729	1.381	1579
osa-miR1127f	2	142	hAT-N43B_OS	590	737	DNA/hAT	d	0.8252	1.5714	769
osa-miR1127g	4	226	STOWAWAY41_OS	1	264	DNA	c	0.7817	1.4444	725
osa-miR1127h	1	152	hAT-N43B_OS	591	741	DNA/hAT	c	0.7961	1.875	774
osa-miR1127i	6	105	TREP219	1	100	DNA/Mariner	c	0.94	1.2	823
osa-miR1127j	6	240	STOWAWAY21_OS	1	243	DNA	c	0.8559	1.4286	1377
osa-miR1127k	4	247	STOWAWAY42_OS	1	242	DNA	c	0.7886	1.5	1116
osa-miR1127l	6	222	STOWAWAY21_OS	2	243	DNA	c	0.8655	1.3333	1269
osa-miR1127m	4	151	hAT-N43B_OS	592	738	DNA/hAT	c	0.8851	1.4545	1039
osa-miR1127n	2	142	hAT-N43B_OS	590	737	DNA/hAT	d	0.7972	1.8571	681
osa-miR1127o	2	140	hAT-N43B_OS	590	735	DNA/hAT	d	0.8085	1.7143	702
osa-miR1127p	6	106	TREP219	1	100	DNA/Mariner	c	0.8911	1.6667	708
osa-miR1127r.1	6	244	STOWAWAY21_OS	1	243	DNA	c	0.8625	1.2857	1426
osa-miR1127r.2	6	118	STOWAWAY15-2_OS	1	145	DNA	d	0.8696	1.4444	635
osa-miR1127s	4	242	TREP215	1	239	DNA	c	0.8661	1.8824	1499
osa-miR1127t	4	100	EnSpm-11_OS	6198	6303	DNA/EnSpm/CACTA	c	0.7778	1.8889	373
osa-miR1127u	1	120	hAT-N43B_OS	589	738	DNA/hAT	d	0.813	1.1176	571
osa-miR1127v	6	238	STOWAWAY9_OS	1	235	DNA	d	0.928	1.4444	1753
osa-miR1127w	6	240	STOWAWAY9_OS	1	235	DNA	c	0.9404	1.2	1843
osa-miR1127x	6	147	STOWAWAY46_OS	1	144	DNA/Mariner	c	0.7778	1.5789	661
osa-miR1127y	6	242	STOWAWAY21_OS	1	243	DNA	c	0.887	1.3158	1599
osa-miR1127z	6	122	STOWAWAY46_OS	1	144	DNA/Mariner	c	0.8235	1.5	525
osa-miR1128a.1	4	245	TREP215	1	239	DNA	c	0.8926	1.9167	1592
osa-miR1128a.2	4	243	TREP215	1	239	DNA	c	0.9042	1.375	1707
osa-miR1128aa	3	127	hAT-N43B_OS	589	739	DNA/hAT	c	0.7463	1.2222	339
osa-miR1128ab	6	60	STOWAWAY9_OS	183	235	DNA	c	0.9074	1	407
osa-miR1128ab	61	121	STOWAWAY9_OS	1	61	DNA	c	0.918	1	512
osa-miR1128ac	6	162	STOWAWAY46_OS	1	144	DNA/Mariner	c	0.8041	1.5625	680
osa-miR1128ad	6	87	TREP219	1	100	DNA/Mariner	d	0.881	1	513
osa-miR1128ae	4	240	TREP215	1	239	DNA	c	0.8619	1.6667	1446
osa-miR1128af	6	105	TREP219	1	100	DNA/Mariner	d	0.98	1	893
osa-miR1128ag	2	150	hAT-N43B_OS	590	739	DNA/hAT	d	0.8609	1.5	952
osa-miR1128ah	4	232	TREP215	1	239	DNA	c	0.913	1.4615	1622
osa-miR1128ai	6	105	TREP219	1	100	DNA/Mariner	d	0.73	1.9231	345
osa-miR1128aj	6	82	STOWAWAY1_OS	1	77	DNA	d	0.9091	1.4	570
osa-miR1128ak	6	155	STOWAWAY1_OS	1	149	DNA	d	0.9333	1.5	1146
osa-miR1128al	4	238	TREP215	1	239	DNA	d	0.8312	1.52	1333
osa-miR1128am	3	153	hAT-N43B_OS	591	740	DNA/hAT	d	0.7947	1.875	782
osa-miR1128b.1	6	110	STOWAWAY1_OS	1	149	DNA	d	0.9018	1	562
osa-miR1128b.2	6	131	STOWAWAY1_OS	1	149	DNA	d	0.8819	1	789
osa-miR1128b.3	6	46	STOWAWAY1_OS	1	41	DNA	d	1	99	379
osa-miR1128b.3	47	92	Helitron-N40_OS	979	1028	DNA/Helitron	d	0.8936	1	294
osa-miR1128b.4	47	88	STOWAWAY1_OS	1	47	DNA	c	0.8837	1	286
osa-miR1128b.5	6	46	STOWAWAY1_OS	1	41	DNA	d	0.9756	99	355
osa-miR1128b.6	6	46	STOWAWAY1_OS	1	41	DNA	d	0.9756	99	354
osa-miR1128c	4	118	STOWAWAY47_OS	1	148	DNA	c	0.8182	1.875	419
osa-miR1128d	4	76	STOWAWAY47_OS	1	66	DNA	d	0.791	1.25	251
osa-miR1128e	1	152	hAT-N43B_OS	591	741	DNA/hAT	c	0.8026	1.8125	799
osa-miR1128f	6	105	TREP219	1	100	DNA/Mariner	c	0.95	1	848
osa-miR1128g	6	248	STOWAWAY9_OS	1	235	DNA	d	0.8703	1.5882	1496
osa-miR1128h	4	120	hAT-N43B_OS	592	738	DNA/hAT	d	0.8167	1.0588	570
osa-miR1128i	4	239	TREP215	1	239	DNA	c	0.9331	1.625	1767
osa-miR1128j	6	244	STOWAWAY21_OS	1	243	DNA	d	0.9292	1.75	1731
osa-miR1128k	1	127	STOWAWAY47_OS	1	148	DNA	c	0.8125	1.5385	533
osa-miR1128l.1	4	247	TREP215	1	239	DNA	d	0.825	1.5385	1305
osa-miR1128l.2	4	239	TREP215	1	239	DNA	d	0.8419	1.5263	1189
osa-miR1128m	6	118	STOWAWAY1_OS	1	149	DNA	c	0.9217	1	736
osa-miR1128n	4	242	TREP215	1	239	DNA	d	0.887	1.6667	1575
osa-miR1128o	6	138	STOWAWAY1_OS	1	149	DNA	c	0.9044	2	867
osa-miR1128p.1	4	114	MIDWAY	455	558	DNA/EnSpm/CACTA	c	0.8286	1.4167	580
osa-miR1128p.2	3	25	EnSpm-11_OS	6197	6219	DNA/EnSpm/CACTA	d	0.9565	1	203
osa-miR1128p.2	35	79	hAT-N43B_OS	696	739	DNA/hAT	d	0.8889	1	302
osa-miR1128q	4	248	TREP215	1	239	DNA	c	0.877	1.3333	1563
osa-miR1128r	1	153	hAT-N43B_OS	591	741	DNA/hAT	c	0.7908	1.875	759
osa-miR1128s	6	243	STOWAWAY9_OS	1	235	DNA	d	0.9409	1.2	1870
osa-miR1128t	6	185	STOWAWAY1_OS	1	149	DNA	c	0.8882	1.2727	904
osa-miR1128u	6	88	TREP219	1	100	DNA/Mariner	d	0.9405	1.3333	602
osa-miR1128v	6	105	TREP219	1	100	DNA/Mariner	d	0.91	1.1667	726
osa-miR1128w	6	121	STOWAWAY1_OS	1	149	DNA	d	0.9231	1.3333	758
osa-miR1128x	6	148	STOWAWAY46_OS	1	144	DNA/Mariner	d	0.8125	1.5625	751
osa-miR1128y	6	145	STOWAWAY46_OS	1	144	DNA/Mariner	c	0.8112	1.3529	718
osa-miR1130a	1	139	STOWAWAY1_OS	2	146	DNA	c	0.8521	1.6364	816
osa-miR1130b.1	1	133	STOWAWAY1_OS	4	148	DNA	d	0.9191	1	953
osa-miR1130b.2	1	121	STOWAWAY1_OS	4	148	DNA	d	0.8934	1	791
osa-miR1130c	3	103	MIDWAY	458	551	DNA/EnSpm/CACTA	c	0.8421	1.4	547
osa-miR1130d	1	116	STOWAWAY1_OS	2	146	DNA	c	0.8376	1.2857	611
osa-miR1130e	1	137	STOWAWAY1_OS	4	148	DNA	d	0.9348	1	1030
osa-miR1130f.1	1	144	STOWAWAY1_OS	4	146	DNA	d	0.8194	1.5625	791
osa-miR1130f.2	3	102	MIDWAY	458	551	DNA/EnSpm/CACTA	c	0.8526	1.4444	566
osa-miR1130g	1	128	STOWAWAY1_OS	2	146	DNA	c	0.8455	1.6	584
osa-miR1130h	1	126	STOWAWAY1_OS	2	146	DNA	c	0.8268	1.75	640
osa-miR1132a.1	1	116	STOWAWAY1_OS	1	147	DNA	c	0.9402	1	813
osa-miR1132a.2	1	113	MIDWAY	459	556	DNA/EnSpm/CACTA	d	0.8485	1.5556	546
osa-miR1132b	1	138	STOWAWAY15-2_OS	1	139	DNA	c	0.7698	1.9375	626
osa-miR1132c	1	149	STOWAWAY47_OS	3	144	DNA	c	0.8088	2	538
osa-miR1132d	1	104	TREP220	5	107	DNA	d	0.8462	1.875	657
osa-miR1132e	1	237	STOWAWAY21_OS	1	241	DNA	c	0.8613	1.2857	1407
osa-miR1132f	2	145	STOWAWAY15-2_OS	1	145	DNA	d	0.8	1.2727	813
osa-miR1132g	1	297	STOWAWAY21_OS	1	241	DNA	c	0.8912	1.5714	1315
osa-miR1132h	1	232	STOWAWAY21_OS	3	243	DNA	d	0.8894	1.375	1515
osa-miR1132i	1	233	STOWAWAY21_OS	3	243	DNA	d	0.7975	1.6923	1107
osa-miR1133a	7	245	STOWAWAY21_OS	1	243	DNA	d	0.8025	1.6957	1029
osa-miR1133b	7	154	STOWAWAY1_OS	1	149	DNA	d	0.8255	1.5625	842
osa-miR1133c	7	240	STOWAWAY9_OS	1	235	DNA	d	0.9191	1.2	1790
osa-miR1133d	7	106	TREP219	1	100	DNA/Mariner	c	0.97	1	877
osa-miR1133e	5	153	STOWAWAY47_OS	1	148	DNA	d	0.8121	2.25	740
osa-miR1133f	7	244	STOWAWAY9_OS	1	235	DNA	d	0.9325	1.3	1805
osa-miR1133g	7	45	TREP219	62	100	DNA/Mariner	c	0.8974	1.3333	287
osa-miR1133h	7	106	TREP219	1	100	DNA/Mariner	c	0.94	1.2	823
osa-miR1133i	5	240	TREP215	1	239	DNA	c	0.9331	1.625	1767
osa-miR1133j	5	119	STOWAWAY47_OS	1	148	DNA	d	0.8182	1.875	419
osa-miR1133k	7	244	STOWAWAY9_OS	1	235	DNA	d	0.9409	1.2	1870
osa-miR1133l	3	141	hAT-N43B_OS	590	735	DNA/hAT	d	0.8085	1.7143	702
osa-miR1133m	3	143	hAT-N43B_OS	590	737	DNA/hAT	d	0.8125	1.5714	702
osa-miR1133n	36	110	hAT-N43B_OS	2209	2283	DNA/hAT	d	0.84	1.2	501
osa-miR1133o	7	149	STOWAWAY46_OS	1	144	DNA/Mariner	d	0.8125	1.5625	751
osa-miR1133p	7	106	TREP219	1	100	DNA/Mariner	c	0.9	1.25	750
osa-miR1133q	7	241	STOWAWAY9_OS	1	235	DNA	d	0.9532	1.375	1933
osa-miR1133r	7	241	STOWAWAY9_OS	1	235	DNA	c	0.9404	1.2	1843
osa-miR1133s	7	225	STOWAWAY2_OS	20	250	DNA	c	0.8348	1.8571	1011
osa-miR1133t	7	123	STOWAWAY46_OS	1	144	DNA/Mariner	c	0.8235	1.5	525
osa-miR1133u	5	109	EnSpm-11_OS	6198	6303	DNA/EnSpm/CACTA	c	0.8491	1.25	704
osa-miR1133v	4	246	STOWAWAY51_OS	1	242	DNA/Mariner	d	0.9136	1.6667	1810
osa-miR1133w	7	238	STOWAWAY21_OS	1	243	DNA	c	0.8504	2.0625	1324
osa-miR1319c	14	77	CACTA-P	904	967	DNA/EnSpm/CACTA	d	0.9219	2.5	466
osa-miR1320a.2-3p	2	59	Harbinger-N22_OS	11	67	DNA/Harbinger	d	0.8364	1.4	280
osa-miR1320b.2-3p	1	58	Harbinger-N22_OS	11	67	DNA/Harbinger	d	0.8364	1.4	280
osa-miR1320d-5p	1	67	Harbinger-N22_OS	11	88	DNA/Harbinger	c	0.7794	1.5556	292
osa-miR1320e-3p	1	66	Harbinger-N22_OS	11	87	DNA/Harbinger	c	0.7761	1.5556	284
osa-miR1431a.2	1	175	DELAY	8	217	DNA/hAT	c	0.8295	1.2609	932
osa-miR1435b	55	107	STOWAWAY41_OS	1	57	DNA	d	0.8889	2.5	324
osa-miR1436aa	1	240	TREP215	4	238	DNA	d	0.822	1.5385	1270
osa-miR1436aaa	1	235	TREP215	4	238	DNA	d	0.9025	1.2353	1670
osa-miR1436aab	1	33	STOWAWAY46_OS	111	143	DNA/Mariner	c	0.9394	2	253
osa-miR1436aab	34	82	STOWAWAY46_OS	96	144	DNA/Mariner	d	0.8776	1	344
osa-miR1436aac	1	236	STOWAWAY21_OS	1	242	DNA	c	0.8866	1.3158	1588
osa-miR1436aad	1	122	hAT-N43B_OS	595	737	DNA/hAT	d	0.7984	1.8333	532
osa-miR1436aae	1	236	TREP215	4	238	DNA	d	0.8814	1.4211	1587
osa-miR1436aaf	1	147	STOWAWAY1_OS	1	148	DNA	c	0.8378	1.6429	861
osa-miR1436aag	1	113	hAT-N43B_OS	595	737	DNA/hAT	d	0.8103	1.125	521
osa-miR1436aah	1	112	STOWAWAY15-2_OS	2	145	DNA	d	0.8684	1.4444	624
osa-miR1436aai	1	236	TREP215	2	236	DNA	c	0.8432	1.7143	1379
osa-miR1436aaj	1	239	STOWAWAY21_OS	2	243	DNA	d	0.8167	2.1765	1096
osa-miR1436ab	1	149	STOWAWAY1_OS	1	147	DNA	c	0.9195	1.25	1096
osa-miR1436ac.1	1	235	TREP215	2	236	DNA	c	0.8979	1.2222	1637
osa-miR1436ac.2	1	235	TREP215	2	236	DNA	c	0.9021	1.2353	1652
osa-miR1436ac.3	1	232	TREP215	2	236	DNA	c	0.8686	1.4375	1372
osa-miR1436ac.4	1	234	TREP215	2	236	DNA	c	0.9106	1.6364	1636
osa-miR1436ad	1	119	hAT-N43B_OS	2138	2282	DNA/hAT	d	0.8512	1.3333	659
osa-miR1436ae	6	106	STOWAWAY26_OS	1	108	DNA	c	0.8113	1.4	500
osa-miR1436ag.1	1	106	TREP220	4	108	DNA	d	0.8491	1.875	675
osa-miR1436ag.2	1	235	STOWAWAY21_OS	2	243	DNA	d	0.8602	1.6111	1373
osa-miR1436ag.3	1	105	TREP220	2	106	DNA	c	0.8286	1.4	572
osa-miR1436ag.4	1	144	STOWAWAY15_OS	1	144	DNA	c	0.7931	1.4	752
osa-miR1436ah	1	236	TREP215	4	238	DNA	d	0.928	1.4545	1772
osa-miR1436ai	1	111	STOWAWAY47_OS	4	147	DNA	d	0.8034	2	376
osa-miR1436aj	1	134	hAT-N43B_OS	595	735	DNA/hAT	d	0.8088	1.7692	674
osa-miR1436ak	1	138	STOWAWAY46_OS	1	143	DNA/Mariner	c	0.8633	1.6	809
osa-miR1436al.1	1	136	STOWAWAY47_OS	2	145	DNA	c	0.8116	2.875	641
osa-miR1436al.2	1	144	hAT-N43B_OS	593	735	DNA/hAT	c	0.8194	1.1364	886
osa-miR1436al.3	1	142	hAT-N43B_OS	595	737	DNA/hAT	d	0.8542	1.5	890
osa-miR1436am	3	102	TREP219	1	100	DNA/Mariner	d	0.91	1.1667	726
osa-miR1436an	1	99	TREP219	2	100	DNA/Mariner	d	0.86	1.7143	635
osa-miR1436ap	33	66	STOWAWAY47_OS	114	147	DNA	d	0.9412	2	265
osa-miR1436aq	1	258	STOWAWAY8_OS	2	259	DNA	d	0.8885	1.25	1727
osa-miR1436ar	1	235	STOWAWAY21_OS	1	242	DNA	c	0.8397	1.6842	1252
osa-miR1436as	3	146	STOWAWAY15-2_OS	1	145	DNA	d	0.8	1.2727	813
osa-miR1436at	1	75	STOWAWAY21_OS	2	76	DNA	d	0.8933	1.3333	544
osa-miR1436at	77	143	STOWAWAY21_OS	1	67	DNA	c	0.8955	1	515
osa-miR1436au	1	254	STOWAWAY8_OS	1	258	DNA	c	0.8789	1.381	1667
osa-miR1436av	1	156	STOWAWAY46_OS	1	143	DNA/Mariner	c	0.8027	1.5625	670
osa-miR1436aw	1	139	STOWAWAY46_OS	1	143	DNA/Mariner	c	0.8099	1.3529	708
osa-miR1436ax	1	233	STOWAWAY21_OS	2	243	DNA	d	0.8898	1.375	1523
osa-miR1436ay	5	134	STOWAWAY47_OS	8	147	DNA	d	0.7537	1.4737	482
osa-miR1436b	1	230	STOWAWAY44_OS	2	237	DNA	c	0.8559	1.3333	1419
osa-miR1436c-5p	38	126	STOWAWAY47_OS	8	98	DNA	c	0.7473	1.8182	310
osa-miR1436d.1	1	144	hAT-N43B_OS	595	737	DNA/hAT	d	0.7586	1.5238	638
osa-miR1436d.2	1	144	hAT-N43B_OS	595	737	DNA/hAT	d	0.7847	1.875	720
osa-miR1436e.1	1	143	STOWAWAY46_OS	1	143	DNA/Mariner	c	0.8881	1.2308	1008
osa-miR1436e.2	1	30	Helitron-N28B_OS	2461	2490	DNA/Helitron	c	0.9333	2	233
osa-miR1436f	1	145	STOWAWAY47_OS	2	145	DNA	c	0.8056	1.8571	696
osa-miR1436g.1	1	236	STOWAWAY21_OS	1	242	DNA	c	0.895	1.7692	1580
osa-miR1436h.1	1	233	STOWAWAY9_OS	2	235	DNA	d	0.9188	1.2	1779
osa-miR1436h.2	1	232	STOWAWAY9_OS	2	235	DNA	d	0.9277	1.4444	1742
osa-miR1436i.1	1	145	STOWAWAY47_OS	4	147	DNA	d	0.8069	2.25	706
osa-miR1436i.2	1	233	STOWAWAY9_OS	1	234	DNA	c	0.9444	1.1	1861
osa-miR1436i.3	1	144	hAT-N43B_OS	593	735	DNA/hAT	c	0.8819	1.4545	1004
osa-miR1436i.4	1	234	STOWAWAY9_OS	2	235	DNA	d	0.928	1.4444	1765
osa-miR1436i.5	1	233	STOWAWAY9_OS	2	235	DNA	d	0.9362	1.3333	1802
osa-miR1436i.6	1	234	STOWAWAY9_OS	1	234	DNA	c	0.9402	1.2	1832
osa-miR1436i.7	1	234	STOWAWAY9_OS	2	235	DNA	d	0.9487	1.5	1899
osa-miR1436j.1	1	232	STOWAWAY2_OS	1	249	DNA	c	0.8388	1.6875	1153
osa-miR1436j.2	1	233	STOWAWAY2_OS	1	249	DNA	c	0.843	1.6875	1192
osa-miR1436k	1	147	STOWAWAY1_OS	1	148	DNA	c	0.9128	1.4286	1052
osa-miR1436l.1	1	238	STOWAWAY21_OS	2	243	DNA	d	0.9004	1.1333	1586
osa-miR1436l.2	1	238	STOWAWAY21_OS	2	243	DNA	d	0.9289	1.75	1720
osa-miR1436l.3	1	298	STOWAWAY21_OS	1	242	DNA	c	0.8917	1.5714	1323
osa-miR1436l.4	1	236	STOWAWAY21_OS	2	243	DNA	d	0.85	1.8125	1297
osa-miR1436m.1	1	147	STOWAWAY1_OS	1	148	DNA	c	0.9122	1.2	1092
osa-miR1436m.2	1	159	STOWAWAY1_OS	1	148	DNA	c	0.9133	1.375	1043
osa-miR1436n.1	1	119	STOWAWAY1_OS	1	148	DNA	c	0.8333	1.2667	623
osa-miR1436n.2	1	149	STOWAWAY1_OS	1	148	DNA	c	0.8389	2.0909	839
osa-miR1436n.3	1	134	STOWAWAY1_OS	2	149	DNA	d	0.8088	1.7143	649
osa-miR1436o	1	243	STOWAWAY21_OS	2	243	DNA	d	0.8491	1.6875	1146
osa-miR1436p	1	38	TREP219	62	99	DNA/Mariner	c	0.8947	1.3333	276
osa-miR1436q.1	3	237	STOWAWAY21_OS	1	243	DNA	c	0.8559	1.4286	1377
osa-miR1436r.1	1	117	STOWAWAY1_OS	1	148	DNA	c	0.9407	1	821
osa-miR1436r.2	1	115	MIDWAY	458	557	DNA/EnSpm/CACTA	d	0.8515	1.5556	562
osa-miR1436s.1	1	223	STOWAWAY21_OS	1	242	DNA	c	0.88	1.2941	1356
osa-miR1436s.2	1	238	STOWAWAY21_OS	1	242	DNA	c	0.9163	1.2143	1708
osa-miR1436s.3	1	238	STOWAWAY21_OS	1	242	DNA	c	0.8619	1.2857	1415
osa-miR1436s.4	1	235	STOWAWAY21_OS	1	242	DNA	c	0.916	1.3077	1689
osa-miR1436t.1	1	138	STOWAWAY47_OS	2	145	DNA	c	0.7391	2.75	396
osa-miR1436t.2	1	235	TREP215	2	236	DNA	c	0.8983	1.375	1633
osa-miR1436t.3	1	225	TREP215	2	236	DNA	c	0.9115	1.4615	1587
osa-miR1436u	1	118	STOWAWAY46_OS	1	143	DNA/Mariner	c	0.7787	1.5333	431
osa-miR1436v	1	122	STOWAWAY46_OS	1	143	DNA/Mariner	c	0.8211	1.9091	569
osa-miR1436w	1	216	STOWAWAY21_OS	2	242	DNA	c	0.8649	1.3333	1258
osa-miR1436x	1	232	TREP215	2	236	DNA	c	0.9319	1.625	1732
osa-miR1436y	1	151	STOWAWAY47_OS	2	145	DNA	c	0.8116	2	554
osa-miR1436z	33	66	STOWAWAY47_OS	114	147	DNA	d	0.9412	1	274
osa-miR1438b	2	132	OSTE19	4	159	DNA	d	0.812	1.4667	591
osa-miR1439aa.1	1	75	EnSpm-11_OS	6196	6303	DNA/EnSpm/CACTA	c	0.8625	3	322
osa-miR1439ab	1	239	TREP215	1	239	DNA	d	0.9042	1.2353	1705
osa-miR1439ac	1	237	TREP215	1	239	DNA	c	0.8619	1.6667	1446
osa-miR1439ad	3	159	STOWAWAY46_OS	1	144	DNA/Mariner	c	0.8041	1.5625	680
osa-miR1439ae	5	104	TREP219	1	100	DNA/Mariner	d	0.98	1	893
osa-miR1439af	10	149	STOWAWAY47_OS	11	148	DNA	d	0.7372	1.8333	449
osa-miR1439ag	3	119	STOWAWAY46_OS	1	144	DNA/Mariner	c	0.8235	1.5	525
osa-miR1439ah	3	102	TREP219	1	100	DNA/Mariner	d	0.92	1.1429	792
osa-miR1439ai	1	242	STOWAWAY51_OS	2	242	DNA/Mariner	d	0.9132	1.6667	1799
osa-miR1439aj	1	238	STOWAWAY44_OS	1	240	DNA	c	0.8833	1.5294	1613
osa-miR1439ak	3	237	STOWAWAY21_OS	1	243	DNA	d	0.7992	1.6923	1126
osa-miR1439b	1	111	hAT-N43B_OS	2135	2283	DNA/hAT	d	0.8407	1.1429	566
osa-miR1439c	1	164	hAT-N43B_OS	592	740	DNA/hAT	d	0.7778	1.7647	643
osa-miR1439e.1	3	236	STOWAWAY9_OS	1	235	DNA	d	0.9191	1.2	1790
osa-miR1439e.2	3	236	STOWAWAY9_OS	1	235	DNA	d	0.9364	1.3333	1813
osa-miR1439f	3	102	TREP219	1	100	DNA/Mariner	d	0.96	1	862
osa-miR1439g.1	3	102	TREP219	1	100	DNA/Mariner	c	0.95	1	848
osa-miR1439g.2	3	102	TREP219	1	100	DNA/Mariner	c	0.94	1.2	823
osa-miR1439h	1	117	STOWAWAY47_OS	1	148	DNA	d	0.8264	3.2	435
osa-miR1439i	1	241	TREP215	1	239	DNA	c	0.8672	1.3636	1549
osa-miR1439j.1	1	244	TREP215	1	239	DNA	d	0.825	1.5385	1305
osa-miR1439j.2	1	239	TREP215	1	239	DNA	c	0.8745	1.5	1577
osa-miR1439k	1	232	STOWAWAY51_OS	2	242	DNA/Mariner	d	0.8894	1.5333	1587
osa-miR1439l	1	239	TREP215	1	239	DNA	d	0.887	1.6667	1575
osa-miR1439m	1	115	STOWAWAY47_OS	1	148	DNA	d	0.8182	1.875	419
osa-miR1439n	3	236	STOWAWAY9_OS	1	235	DNA	c	0.9447	1.1	1872
osa-miR1439o.1	1	148	hAT-N43B_OS	592	738	DNA/hAT	c	0.8851	1.4545	1039
osa-miR1439p	3	159	STOWAWAY1_OS	1	149	DNA	c	0.8933	1.4	995
osa-miR1439r	3	241	STOWAWAY21_OS	1	243	DNA	c	0.8625	1.2857	1426
osa-miR1439t	7	240	STOWAWAY44_OS	1	237	DNA	c	0.8432	1.9444	1363
osa-miR1439u	3	142	STOWAWAY46_OS	1	144	DNA/Mariner	c	0.8112	1.3529	718
osa-miR1439v	3	236	STOWAWAY21_OS	1	243	DNA	d	0.8903	1.375	1534
osa-miR1439w	3	241	STOWAWAY51_OS	2	242	DNA/Mariner	c	0.8921	1.5	1691
osa-miR1439x	3	237	STOWAWAY9_OS	1	235	DNA	d	0.9532	1.375	1933
osa-miR1439y	3	239	STOWAWAY9_OS	1	235	DNA	c	0.9322	1.1538	1851
osa-miR1522	1	244	STOWAWAY41_OS	8	257	DNA	d	0.8	1.76	1078
osa-miR1847b	7	51	MERMITE	1072	1110	DNA	d	0.875	2	214
osa-miR1848b	1	51	OSTONOR1_I	183	227	LTR/Copia	c	0.913	1.5	343
osa-miR1849b	3	101	STOWAWAY47_OS	26	124	DNA	c	0.8081	1.2667	553
osa-miR1850a.2	1	46	UNIQUE	3	47	DNA	c	0.8043	2	233
osa-miR1850a.2	52	101	UNIQUE	1	49	DNA	d	0.82	2.6667	266
osa-miR1862h	1	111	STOWAWAY47_OS	9	138	DNA	c	0.7807	1.4667	439
osa-miR1862i	1	128	hAT-N43B_OS	602	728	DNA/hAT	c	0.8359	1.1765	808
osa-miR1862j	1	127	hAT-N43B_OS	602	727	DNA/hAT	c	0.7717	2.3333	550
osa-miR1862k	1	127	STOWAWAY47_OS	12	138	DNA	d	0.7656	2.1538	501
osa-miR1862l	1	120	STOWAWAY47_OS	11	140	DNA	d	0.75	1.5294	418
osa-miR1862m	23	88	STOWAWAY47_OS	76	140	DNA	d	0.9242	4	461
osa-miR1862n	1	127	hAT-N43B_OS	603	729	DNA/hAT	d	0.8372	1.5455	721
osa-miR1862o	1	126	hAT-N43B_OS	603	729	DNA/hAT	d	0.8594	1.6667	780
osa-miR1862p	1	128	hAT-N43B_OS	603	729	DNA/hAT	d	0.7656	1.9333	580
osa-miR1862r	3	73	EnSpm-11_OS	6215	6286	DNA/EnSpm/CACTA	d	0.8472	2.6667	378
osa-miR1867b	1	113	hAT-N43B_OS	595	737	DNA/hAT	d	0.8103	1.0588	535
osa-miR1867c	1	144	STOWAWAY47_OS	4	147	DNA	d	0.7655	1.8824	605
osa-miR1867d	1	244	STOWAWAY9_OS	2	235	DNA	d	0.8814	1.2941	1486
osa-miR1867e	1	231	STOWAWAY21_OS	1	242	DNA	c	0.8498	2.0625	1313
osa-miR186q	1	60	hAT-N43_OS	1213	1272	DNA/hAT	c	0.85	1.2857	393
osa-miR186q	63	97	hAT-N43_OS	1239	1274	DNA/hAT	d	0.8611	2	216
osa-miR1884aa	1	206	TREP215	17	222	DNA	c	0.9029	1.4286	1452
osa-miR1884aaa	1	205	STOWAWAY2_OS	20	235	DNA	c	0.816	1.25	995
osa-miR1884ab	1	201	STOWAWAY2_OS	20	237	DNA	d	0.8086	2.3333	769
osa-miR1884ac	1	199	TREP215	20	218	DNA	c	0.8844	1.7692	1305
osa-miR1884ad	1	204	TREP215	17	222	DNA	c	0.8792	1.5	1210
osa-miR1884ae	1	207	STOWAWAY2_OS	20	237	DNA	d	0.8411	1.9286	1067
osa-miR1884af	1	208	TREP215	18	224	DNA	d	0.9043	1.1333	1442
osa-miR1884ag	1	206	TREP215	17	222	DNA	c	0.8986	1.3571	1402
osa-miR1884ah	1	209	STOWAWAY2_OS	20	235	DNA	c	0.8404	2.0833	1001
osa-miR1884ai	1	204	TREP215	18	223	DNA	d	0.8683	1.5294	1279
osa-miR1884aj	1	199	TREP215	22	220	DNA	d	0.905	1.1333	1406
osa-miR1884ak	1	195	TREP215	22	216	DNA	d	0.9436	1.2222	1531
osa-miR1884al	1	204	TREP215	18	224	DNA	d	0.9122	1.1538	1415
osa-miR1884am	1	204	hAT-N43_OS	1553	1758	DNA/hAT	d	0.9317	1.8571	1507
osa-miR1884an	1	206	TREP215	18	223	DNA	d	0.8889	1.75	1344
osa-miR1884ao	1	205	STOWAWAY2_OS	20	235	DNA	c	0.8498	1.6429	1087
osa-miR1884ap	1	191	STOWAWAY2_OS	31	231	DNA	c	0.8636	1.7273	1068
osa-miR1884aq.1	1	202	TREP215	17	222	DNA	c	0.902	1.0667	1366
osa-miR1884aq.2	1	206	TREP215	17	222	DNA	c	0.9223	1.6	1504
osa-miR1884aq.3	1	205	TREP215	17	222	DNA	c	0.9126	1.5	1415
osa-miR1884ar	1	196	TREP215	22	220	DNA	d	0.9137	1.1667	1366
osa-miR1884as	1	207	TREP215	18	224	DNA	d	0.9227	1.4545	1524
osa-miR1884at	1	207	STOWAWAY2_OS	20	237	DNA	d	0.8419	1.5625	1073
osa-miR1884au	1	206	TREP215	18	224	DNA	d	0.9227	1.8571	1446
osa-miR1884av	1	202	TREP215	18	223	DNA	d	0.848	1.5263	1177
osa-miR1884aw	1	207	TREP215	18	223	DNA	d	0.8986	1.3333	1430
osa-miR1884ax	1	186	hAT-N43_OS	1553	1758	DNA/hAT	d	0.8663	1.8462	1077
osa-miR1884ay	1	202	STOWAWAY2_OS	21	235	DNA	c	0.8269	2	982
osa-miR1884az	5	203	STOWAWAY2_OS	21	231	DNA	c	0.8146	2.8182	865
osa-miR1884c	1	199	TREP215	22	220	DNA	d	0.9095	1.3846	1434
osa-miR1884d	1	205	TREP215	17	222	DNA	c	0.932	1.1818	1552
osa-miR1884e	1	205	TREP215	18	224	DNA	d	0.8841	1.5	1244
osa-miR1884f	1	206	TREP215	18	223	DNA	d	0.9078	1.3571	1475
osa-miR1884g	1	206	hAT-N43_OS	1551	1756	DNA/hAT	c	0.9078	1.7273	1455
osa-miR1884h.1	1	208	STOWAWAY2_OS	20	235	DNA	c	0.8443	2.0833	1029
osa-miR1884h.2	1	204	STOWAWAY2_OS	20	235	DNA	c	0.8396	1.7143	1010
osa-miR1884i.1	1	207	TREP215	18	224	DNA	d	0.9324	1.2727	1572
osa-miR1884i.2	1	206	TREP215	17	222	DNA	c	0.8981	1.1875	1406
osa-miR1884j	1	203	TNR1	16	223	DNA	d	0.8883	1.5455	1219
osa-miR1884k	1	201	TREP215	20	218	DNA	c	0.8955	1.2667	1373
osa-miR1884l	1	208	TREP215	17	222	DNA	c	0.8942	1.25	1414
osa-miR1884m	1	211	TREP215	18	223	DNA	d	0.8309	1.5	1117
osa-miR1884n	1	207	TREP215	18	224	DNA	d	0.8889	1.4	1359
osa-miR1884o	1	205	STOWAWAY2_OS	20	235	DNA	c	0.8302	1.5882	996
osa-miR1884p	2	209	TNR1	17	224	DNA	d	0.8606	1.5625	1173
osa-miR1884q	1	203	TREP215	17	222	DNA	c	0.8488	1.5263	1203
osa-miR1884r	1	208	TNR1	16	224	DNA	d	0.8278	1.4545	1099
osa-miR1884s	1	208	TREP215	18	224	DNA	d	0.8173	1.3704	1138
osa-miR1884t.1	1	207	TNR1	16	224	DNA	d	0.8756	1.75	1196
osa-miR1884t.2	1	208	TREP215	18	224	DNA	d	0.8606	1.2727	1306
osa-miR1884t.3	1	207	TNR1	16	224	DNA	d	0.8708	1.9091	1151
osa-miR1884u	1	207	TREP215	18	224	DNA	d	0.8744	1.625	1331
osa-miR1884v	1	206	TREP215	17	222	DNA	c	0.8981	1.5	1421
osa-miR1884w	1	206	TREP215	17	222	DNA	c	0.8883	1.7692	1361
osa-miR1884x	1	212	TREP215	17	222	DNA	c	0.8673	1.2941	1282
osa-miR1884y.1	1	208	TREP215	18	224	DNA	d	0.9279	1.4	1534
osa-miR1884y.2	1	205	TREP215	16	222	DNA	c	0.913	1.1538	1449
osa-miR1884y.3	1	199	TREP215	18	217	DNA	d	0.915	1.3333	1437
osa-miR1884z	1	206	STOWAWAY2_OS	20	235	DNA	c	0.8169	1.2609	985
osa-miR1919	10	103	TNR3	1290	1382	DNA/EnSpm/CACTA	d	0.8421	3	523
osa-miR2123a.1	1	196	TREP215	22	217	DNA	c	0.9031	1.5833	1371
osa-miR2123a.2	1	194	TREP215	23	218	DNA	d	0.8718	1.6	1229
osa-miR2123a.3	1	194	TREP215	22	217	DNA	c	0.8827	1.6667	1233
osa-miR2123a.4	1	197	TREP215	23	218	DNA	d	0.9036	1.3846	1380
osa-miR2123aa	6	196	STOWAWAY2_OS	31	231	DNA	d	0.8485	1.5714	1023
osa-miR2123ab	1	192	TREP215	23	218	DNA	d	0.8454	1.5556	1112
osa-miR2123ac	1	197	TREP215	22	217	DNA	c	0.8528	1.75	1161
osa-miR2123b.1	1	197	TREP215	23	219	DNA	d	0.934	1.3	1507
osa-miR2123b.2	1	197	TREP215	23	219	DNA	d	0.9086	1.3846	1418
osa-miR2123b.3	1	202	TREP215	23	219	DNA	d	0.8232	1.5	1045
osa-miR2123c	1	195	TREP215	22	217	DNA	c	0.9337	1.2	1487
osa-miR2123d	1	195	TREP215	23	219	DNA	d	0.8782	1.5	1164
osa-miR2123e	1	196	hAT-N43_OS	1556	1751	DNA/hAT	c	0.9031	1.7273	1372
osa-miR2123f	1	189	STOWAWAY2_OS	31	230	DNA	c	0.8469	1.75	968
osa-miR2123g.1	1	198	TREP215	21	217	DNA	c	0.8737	1.3333	1285
osa-miR2123g.2	1	44	Helitron-N34_OS	973	1016	DNA/Helitron	d	0.9318	1	358
osa-miR2123g.3	1	196	TREP215	23	219	DNA	d	0.9239	2	1381
osa-miR2123h	1	198	TREP215	22	217	DNA	c	0.899	1.2857	1364
osa-miR2123i	1	199	TREP215	23	218	DNA	d	0.8889	1.4286	1335
osa-miR2123j	1	196	TREP215	22	217	DNA	c	0.898	1.2	1341
osa-miR2123k	1	197	TREP215	23	219	DNA	d	0.8832	1.4	1279
osa-miR2123l.1	1	194	TREP215	21	217	DNA	c	0.8469	1.5556	1146
osa-miR2123m	1	202	TREP215	22	217	DNA	c	0.8706	1.3333	1232
osa-miR2123n	1	196	TREP215	22	217	DNA	c	0.8724	2.0833	1222
osa-miR2123o	1	197	TREP215	23	218	DNA	d	0.934	1.5	1476
osa-miR2123p	1	197	TNR1	21	219	DNA	d	0.8693	1.75	1116
osa-miR2123q	1	191	STOWAWAY2_OS	31	230	DNA	c	0.8223	1.2381	943
osa-miR2123r	1	196	TREP215	22	217	DNA	c	0.8878	1.8333	1296
osa-miR2123s	2	47	Helitron-N34_OS	974	1018	DNA/Helitron	d	0.9565	1	368
osa-miR2123s	48	88	Helitron-N34_OS	974	1014	DNA/Helitron	c	0.8293	1.1667	264
osa-miR2123t	1	197	TREP215	23	218	DNA	d	0.9091	1.1538	1384
osa-miR2123u	1	197	TREP215	23	219	DNA	d	0.8543	1.9231	1112
osa-miR2123v.1	1	195	TREP215	22	217	DNA	c	0.9133	1.5556	1350
osa-miR2123v.2	1	192	TREP215	22	217	DNA	c	0.9072	1.0769	1316
osa-miR2123v.3	1	196	TREP215	22	217	DNA	c	0.9184	2	1407
osa-miR2123w	1	192	hAT-N43_OS	1558	1751	DNA/hAT	d	0.9326	1.7143	1430
osa-miR2123x	1	196	TREP215	23	218	DNA	d	0.8883	1.8182	1279
osa-miR2123y	1	190	STOWAWAY2_OS	31	230	DNA	c	0.8629	1.7273	1060
osa-miR2123z	1	193	TREP215	23	218	DNA	d	0.9175	1.1818	1357
osa-miR396i	63	118	Copia-2_LMi-I	2277	2334	LTR/Copia	d	0.7931	1.1429	232
osa-miR3981a.2-3p	1	82	STOWAWAY46_OS	36	107	DNA/Mariner	c	0.8108	1.7143	326
osa-miR3981b	2	72	STOWAWAY47_OS	41	111	DNA	d	0.8732	1.2857	474
osa-miR3981c	1	73	STOWAWAY15-2_OS	36	108	DNA	c	0.726	1.6667	280
osa-miR420b	1	140	TRUNCATOR2_LTR	255	394	LTR	c	0.9571	2	1167
osa-miR437b	1	160	STOWAWAY41_OS	45	218	DNA	c	0.821	1.3333	715
osa-miR437c	1	164	STOWAWAY41_OS	45	218	DNA	c	0.7964	1.3478	739
osa-miR437d	1	171	STOWAWAY41_OS	46	219	DNA	d	0.8324	1.5	897
osa-miR439j	1	77	MuDR4_OS	7325	7402	DNA/MuDR	c	0.7436	1.4615	345
osa-miR441aa	1	80	STOWAWAY1_OS	35	113	DNA	c	0.8875	1.1429	536
osa-miR441ab	1	80	STOWAWAY1_OS	35	113	DNA	c	0.8375	3	408
osa-miR441ac	1	80	STOWAWAY1_OS	37	115	DNA	d	0.8625	1.25	496
osa-miR441ad	1	80	STOWAWAY1_OS	37	115	DNA	d	0.9125	1.5	556
osa-miR441ae	1	80	STOWAWAY1_OS	35	113	DNA	c	0.9375	2	586
osa-miR441af	1	80	STOWAWAY1_OS	37	115	DNA	d	0.925	1.25	579
osa-miR441ag	1	80	STOWAWAY1_OS	37	115	DNA	d	0.9	1.1667	550
osa-miR441ah	4	80	STOWAWAY1_OS	40	115	DNA	d	0.9091	1.5	527
osa-miR441ai	1	80	STOWAWAY1_OS	35	113	DNA	c	0.8375	1.2	466
osa-miR441aj	4	80	STOWAWAY1_OS	35	110	DNA	c	0.9091	1.2	536
osa-miR441ak	1	80	STOWAWAY1_OS	35	113	DNA	c	0.875	1.125	520
osa-miR441al	1	80	STOWAWAY1_OS	35	113	DNA	c	0.8875	2	506
osa-miR441b.1	1	80	STOWAWAY1_OS	37	115	DNA	d	0.9125	1.5	555
osa-miR441b.2	1	80	STOWAWAY1_OS	35	113	DNA	c	0.9125	1.5	556
osa-miR441b.3	4	59	STOWAWAY1_OS	35	110	DNA	c	0.9474	1	359
osa-miR441b.4	1	73	STOWAWAY1_OS	35	113	DNA	c	0.8933	3	438
osa-miR441c.1	1	81	STOWAWAY1_OS	35	115	DNA	d	0.878	1.6	498
osa-miR441c.2	1	80	STOWAWAY1_OS	37	115	DNA	d	0.9	1.4	541
osa-miR441d	1	82	STOWAWAY1_OS	35	113	DNA	c	0.9	1.1667	543
osa-miR441e	7	79	STOWAWAY1_OS	44	115	DNA	d	0.9178	1.25	516
osa-miR441f	4	82	STOWAWAY1_OS	35	110	DNA	c	0.9091	1.2	528
osa-miR441g	1	79	STOWAWAY1_OS	37	115	DNA	d	0.9	1.5	518
osa-miR441h	1	76	STOWAWAY1_OS	36	115	DNA	d	0.8846	1.1667	485
osa-miR441i	1	79	STOWAWAY1_OS	35	113	DNA	c	0.8875	1.4	505
osa-miR441j	1	79	STOWAWAY1_OS	35	113	DNA	c	0.9	2	512
osa-miR441k	1	79	STOWAWAY1_OS	37	115	DNA	d	0.9125	1.25	541
osa-miR441l.1	7	54	DNA9-N5C_OS	371	418	DNA	d	0.875	2	300
osa-miR441m.1	1	91	STOWAWAY1_OS	37	115	DNA	d	0.9136	1.25	511
osa-miR441m.2	4	80	STOWAWAY1_OS	35	110	DNA	c	0.9221	1.25	551
osa-miR441n	1	80	STOWAWAY1_OS	35	113	DNA	c	0.875	1.8	493
osa-miR441o.1	1	73	STOWAWAY1_OS	37	115	DNA	d	0.8919	1.4	469
osa-miR441o.2	1	80	STOWAWAY1_OS	35	113	DNA	c	0.9125	2	548
osa-miR441p	1	82	STOWAWAY1_OS	35	113	DNA	c	0.875	1.5	509
osa-miR441r.1	1	110	STOWAWAY1_OS	35	113	DNA	c	0.8537	1.5	332
osa-miR441r.2	1	82	STOWAWAY1_OS	35	113	DNA	c	0.875	1.2857	503
osa-miR441t	1	80	STOWAWAY1_OS	37	115	DNA	d	0.9	1.4	540
osa-miR441u.1	1	73	STOWAWAY1_OS	37	115	DNA	d	0.88	2	411
osa-miR441u.2	1	80	STOWAWAY1_OS	35	113	DNA	c	0.9	1.4	541
osa-miR441v	21	56	STOWAWAY1_OS	80	115	DNA	d	0.9444	2	277
osa-miR441w	1	67	STOWAWAY1_OS	35	113	DNA	c	0.9118	1.25	436
osa-miR441x	1	80	STOWAWAY1_OS	35	113	DNA	c	0.9	1.75	533
osa-miR441y	1	78	STOWAWAY1_OS	36	115	DNA	d	0.8875	1.1667	512
osa-miR441z	2	56	STOWAWAY1_OS	35	86	DNA	c	0.7778	1.25	224
osa-miR442b	1	129	OLO24C	112	240	DNA/Harbinger	c	0.9225	1.25	1012
osa-miR442c	1	125	OLO24C	116	240	DNA/Harbinger	c	0.928	1.5	992
osa-miR442d.1	1	133	OLO24C	108	240	DNA/Harbinger	c	0.8722	1.4167	915
osa-miR442d.2	1	133	OLO24C	108	240	DNA/Harbinger	c	0.8947	1.4	972
osa-miR442d.3	1	133	OLO24C	108	240	DNA/Harbinger	c	0.9173	1.5714	1019
osa-miR442d.4	1	133	OLO24C	108	240	DNA/Harbinger	c	0.9248	1.4286	1042
osa-miR443b	5	52	STOWAWAY47_OS	50	97	DNA	c	0.8958	1.6667	328
osa-miR444h.1	85	143	Copia-51_BRa-I	3296	3355	LTR/Copia	d	0.7627	1.7143	231
osa-miR444h.3	84	142	Copia-51_BRa-I	3296	3355	LTR/Copia	d	0.7627	1.7143	231
osa-miR445b	1	260	NDNA2TNA_OS	45	304	DNA/Harbinger	d	0.9692	1.1429	2202
osa-miR445c	1	258	NDNA2TNA_OS	44	302	DNA/Harbinger	c	0.8919	1.2273	1832
osa-miR445d	1	260	NDNA2TNA_OS	43	302	DNA/Harbinger	c	0.9885	1.5	2277
osa-miR445e	2	259	NDNA2TNA_OS	43	301	DNA/Harbinger	c	0.9614	1.5	2124
osa-miR446aa	1	77	STOWAWAY1_OS	34	116	DNA	c	0.8987	3	470
osa-miR446ab	1	85	STOWAWAY1_OS	33	116	DNA	c	0.8471	1.3333	499
osa-miR446ac.1	1	86	STOWAWAY1_OS	32	116	DNA	c	0.907	1.4	595
osa-miR446ac.2	1	86	STOWAWAY1_OS	32	116	DNA	c	0.907	1.75	586
osa-miR446ac.3	1	86	STOWAWAY1_OS	32	116	DNA	c	0.8953	1.6	572
osa-miR446ad.1	1	79	STOWAWAY1_OS	34	118	DNA	d	0.8765	1.75	450
osa-miR446ad.2	1	79	STOWAWAY1_OS	34	118	DNA	d	0.8889	2	465
osa-miR446ae	1	62	STOWAWAY1_OS	32	116	DNA	c	0.9048	1	356
osa-miR446af	1	86	STOWAWAY1_OS	32	116	DNA	c	0.8605	1.375	527
osa-miR446ag.1	1	86	STOWAWAY1_OS	34	118	DNA	d	0.9186	1.2	619
osa-miR446ah	1	86	STOWAWAY1_OS	32	116	DNA	c	0.8837	1.125	574
osa-miR446ai	1	86	STOWAWAY1_OS	32	116	DNA	c	0.8837	1.8	545
osa-miR446aj	1	85	STOWAWAY1_OS	34	118	DNA	d	0.8953	1.75	563
osa-miR446ak	1	86	STOWAWAY1_OS	32	116	DNA	c	0.8953	1.1429	590
osa-miR446al	1	86	STOWAWAY1_OS	32	116	DNA	c	0.8488	3	462
osa-miR446am	1	86	STOWAWAY1_OS	34	118	DNA	d	0.8721	1.25	550
osa-miR446an	1	86	STOWAWAY1_OS	34	118	DNA	d	0.9186	1.5	610
osa-miR446ao	1	86	STOWAWAY1_OS	34	118	DNA	d	0.907	1.1667	604
osa-miR446ap	1	83	STOWAWAY1_OS	33	116	DNA	c	0.8333	1.1818	487
osa-miR446aq	1	86	STOWAWAY1_OS	34	118	DNA	d	0.8605	1.8333	511
osa-miR446ar	1	86	STOWAWAY1_OS	34	118	DNA	d	0.8837	1.2857	563
osa-miR446b.1	1	86	STOWAWAY1_OS	32	116	DNA	c	0.9186	1.2	620
osa-miR446b.2	3	84	STOWAWAY1_OS	35	118	DNA	d	0.8929	1.1667	550
osa-miR446b.3	1	61	STOWAWAY1_OS	34	118	DNA	d	0.8871	1	329
osa-miR446c	1	85	STOWAWAY1_OS	34	117	DNA	d	0.9176	1.5	598
osa-miR446d	20	62	STOWAWAY1_OS	32	74	DNA	c	0.8837	1.25	300
osa-miR446e	1	73	STOWAWAY1_OS	34	118	DNA	d	0.8816	1	431
osa-miR446f	1	88	STOWAWAY1_OS	32	116	DNA	c	0.907	1.1667	597
osa-miR446g	1	86	STOWAWAY1_OS	32	116	DNA	c	0.8721	2.5	511
osa-miR446h.1	1	85	STOWAWAY1_OS	34	118	DNA	d	0.907	1.5	572
osa-miR446h.2	1	86	STOWAWAY1_OS	32	116	DNA	c	0.8837	1.8	547
osa-miR446i	1	84	STOWAWAY1_OS	34	118	DNA	d	0.8824	1.2857	555
osa-miR446j	1	86	STOWAWAY1_OS	34	118	DNA	d	0.8605	1.375	523
osa-miR446k.1	1	84	STOWAWAY1_OS	34	118	DNA	d	0.9186	1.3333	571
osa-miR446k.2	1	65	STOWAWAY1_OS	32	116	DNA	c	0.9242	1	413
osa-miR446k.3	7	52	STOWAWAY1_OS	72	118	DNA	d	0.9362	2	336
osa-miR446l	6	86	STOWAWAY1_OS	32	111	DNA	c	0.8519	1.5714	471
osa-miR446m	14	59	STOWAWAY1_OS	33	78	DNA	c	0.8913	1.6667	311
osa-miR446n.1	1	86	STOWAWAY1_OS	32	116	DNA	c	0.8736	2	497
osa-miR446n.2	1	86	STOWAWAY1_OS	32	116	DNA	c	0.8372	1.8571	467
osa-miR446o.1	1	86	STOWAWAY1_OS	32	116	DNA	c	0.8721	1.25	550
osa-miR446o.2	1	90	STOWAWAY1_OS	32	117	DNA	c	0.8539	1.25	501
osa-miR446p	1	85	STOWAWAY1_OS	34	117	DNA	d	0.8941	1.1429	579
osa-miR446q	1	87	STOWAWAY1_OS	32	116	DNA	c	0.8736	1.5	528
osa-miR446r	1	95	STOWAWAY1_OS	34	117	DNA	d	0.907	1.2	544
osa-miR446s	7	61	STOWAWAY1_OS	40	118	DNA	d	0.8393	1	248
osa-miR446t.1	1	85	STOWAWAY1_OS	32	116	DNA	c	0.907	2	566
osa-miR446t.2	1	79	STOWAWAY1_OS	34	118	DNA	d	0.9	1.4	523
osa-miR446u.1	1	86	STOWAWAY1_OS	32	116	DNA	c	0.8837	1.2857	565
osa-miR446u.2	1	84	STOWAWAY1_OS	32	116	DNA	c	0.8706	1.25	542
osa-miR446u.3	1	50	STOWAWAY1_OS	6	55	DNA	c	0.94	1.5	396
osa-miR446u.3	51	96	STOWAWAY1_OS	93	138	DNA	c	0.8913	1	338
osa-miR446v	1	97	STOWAWAY1_OS	34	118	DNA	d	0.9195	1.25	565
osa-miR446w.2	7	52	STOWAWAY1_OS	72	118	DNA	d	0.9149	1.5	321
osa-miR446x	1	86	STOWAWAY1_OS	32	116	DNA	c	0.8605	1.8333	523
osa-miR446y.1	1	86	STOWAWAY1_OS	34	118	DNA	d	0.8953	1.3333	579
osa-miR446y.2	1	86	STOWAWAY1_OS	34	118	DNA	d	0.907	1.4	595
osa-miR446z	6	86	STOWAWAY1_OS	32	111	DNA	c	0.8642	1.4286	495
osa-miR477	1	68	ZM13-1_OS	35	103	DNA	c	0.8696	1	506
osa-miR4993d	1	98	OSTE1	189	280	DNA	d	0.7684	1.7778	274
osa-miR4993e	7	58	RTEX-1_CR	1435	1486	NonLTR/RTEX	c	0.7925	1.5	216
osa-miR5021c	4	81	L1-40_AAe	4558	4640	NonLTR/L1	c	0.7875	4.3333	222
osa-miR5021d	1	65	Polinton-1_SP	11729	11791	DNA/Polinton	d	0.7656	2.6	246
osa-miR5057a	1	212	STOWAWAY41_OS	16	250	DNA	d	0.77	1.3571	621
osa-miR5075b	2	40	SZ-67LTR	1233	1271	LTR	d	0.8718	1.25	269
osa-miR5161b	1	210	STOWAWAY41_OS	1	264	DNA	d	0.8279	1.8824	854
osa-miR5161c	3	239	STOWAWAY21_OS	1	243	DNA	c	0.8954	1.7692	1591
osa-miR5161d	2	34	STOWAWAY47_OS	116	148	DNA	c	0.8788	1	238
osa-miR5161d	37	71	STOWAWAY47_OS	114	148	DNA	d	0.9429	1	282
osa-miR5161e	3	237	TNR1	1	237	DNA	d	0.8692	1.7333	1366
osa-miR5161f	21	239	STOWAWAY21_OS	17	243	DNA	d	0.8493	1.5294	1131
osa-miR5161g	1	117	hAT-N43B_OS	592	738	DNA/hAT	d	0.8083	1.0556	555
osa-miR5161h	3	150	STOWAWAY1_OS	1	149	DNA	c	0.8389	1.6429	872
osa-miR5169a	1	146	STOWAWAY41_OS	60	202	DNA	c	0.8811	1.1667	841
osa-miR5169b	1	146	STOWAWAY41_OS	62	204	DNA	d	0.8531	1.7273	755
osa-miR5169c	1	139	STOWAWAY41_OS	62	204	DNA	d	0.8369	1.4	739
osa-miR5169d	1	141	STOWAWAY41_OS	60	202	DNA	c	0.8873	1.3636	891
osa-miR5169e	1	132	STOWAWAY41_OS	62	202	DNA	d	0.8	1.6	555
osa-miR5169f	1	140	STOWAWAY41_OS	62	204	DNA	d	0.8169	1.6	676
osa-miR5171a	1	226	STOWAWAY44_OS	4	235	DNA	c	0.8534	1.3333	1381
osa-miR5171b	1	233	STOWAWAY21_OS	4	240	DNA	d	0.8017	1.6522	994
osa-miR5175a	1	231	TREP215	4	234	DNA	c	0.9095	1.7273	1620
osa-miR5175b	1	231	TREP215	6	236	DNA	d	0.9009	1.2353	1632
osa-miR5175c	1	231	TREP215	6	236	DNA	d	0.9091	1.4	1681
osa-miR5203a	1	140	hAT-N43B_OS	595	733	DNA/hAT	c	0.8786	1.4545	966
osa-miR5205a	1	37	hAT-N43B_OS	2243	2280	DNA/hAT	c	0.8684	1	256
osa-miR5205a	38	107	hAT-N43B_OS	2213	2282	DNA/hAT	d	0.8429	1.2222	467
osa-miR5205b	39	76	hAT-N43B_OS	2136	2173	DNA/hAT	c	0.8421	1	259
osa-miR5205c	29	99	STOWAWAY47_OS	3	73	DNA	c	0.9437	4	544
osa-miR5205d	1	124	STOWAWAY50_OS	2	171	DNA	c	0.88	2	612
osa-miR5205e.1	1	233	TREP215	3	235	DNA	c	0.9013	1.2353	1636
osa-miR5205e.2	1	232	TREP215	3	235	DNA	c	0.9099	1.6364	1620
osa-miR5205f	1	235	TREP215	4	238	DNA	d	0.8851	1.6667	1540
osa-miR5205g	1	234	TREP215	5	237	DNA	d	0.9274	1.4545	1756
osa-miR5205h	2	138	STOWAWAY46_OS	1	141	DNA/Mariner	c	0.8143	1.375	704
osa-miR5205i	1	233	TREP215	3	235	DNA	c	0.8974	1.375	1617
osa-miR5205j	1	237	STOWAWAY21_OS	1	241	DNA	c	0.9034	1.1765	1655
osa-miR5205l	1	256	STOWAWAY8_OS	2	259	DNA	d	0.8764	1.2273	1646
osa-miR5205m	2	33	Helitron-N28B_OS	2461	2492	DNA/Helitron	c	0.9375	2	249
osa-miR5205n	1	257	STOWAWAY41_OS	2	261	DNA	c	0.8456	1.9	1426
osa-miR5205o	1	234	STOWAWAY21_OS	2	243	DNA	d	0.7983	1.6923	1115
osa-miR5337c	21	222	STOWAWAY25_SB	26	221	DNA	c	0.775	1.625	771
osa-miR5340b	1	70	DNA9-36_OS	84	153	DNA	d	0.8857	1.6	501
osa-miR5382a	1	205	COWARD-3	1	220	DNA/Harbinger	c	0.878	1.3333	1240
osa-miR5386	1	41	SZ-67LTR	1231	1271	LTR	d	0.8293	2.3333	232
osa-miR5542b	2	125	OSTE19	21	145	DNA	d	0.8016	1.8333	596
osa-miR5567	1	247	OLO24C	56	296	DNA/Harbinger	d	0.8917	1.5333	1581
osa-miR806a.2	1	185	TREP215	29	213	DNA	d	0.9081	1.4167	1325
osa-miR806a.3	1	186	TREP215	29	213	DNA	d	0.871	1.9167	1143
osa-miR806a.4	1	186	TREP215	29	213	DNA	d	0.8978	1.3846	1280
osa-miR806b.1	1	184	TREP215	27	211	DNA	c	0.9351	1.2222	1402
osa-miR806b.2	1	185	TREP215	27	211	DNA	c	0.9189	1.5	1355
osa-miR806c	1	185	TREP215	29	213	DNA	d	0.9351	1.3333	1414
osa-miR806d	1	182	hAT-N43_OS	1564	1745	DNA/hAT	c	0.9066	1.8889	1272
osa-miR806e	1	183	TREP215	29	211	DNA	c	0.8798	2	1164
osa-miR806f	1	185	TREP215	29	213	DNA	d	0.8649	1.5625	1166
osa-miR806g	1	185	TREP215	27	211	DNA	c	0.9027	1.6364	1286
osa-miR806h	10	185	TREP215	37	213	DNA	d	0.8652	2.1	1021
osa-miR806i	1	185	TREP215	27	211	DNA	c	0.8865	1.9091	1211
osa-miR806j	1	48	TREP215	1	48	DNA	c	0.9375	1.5	386
osa-miR806j	56	103	TNR1	189	237	DNA	c	0.8367	1.75	276
osa-miR806k	1	183	hAT-N43_OS	1563	1745	DNA/hAT	c	0.9235	1.5556	1360
osa-miR806l	1	185	TREP215	29	213	DNA	d	0.8817	1.8182	1179
osa-miR806m	1	184	TREP215	29	213	DNA	d	0.9189	2	1273
osa-miR806n	1	181	TREP215	29	213	DNA	d	0.8415	1.5882	1027
osa-miR808aa	2	96	STOWAWAY1_OS	30	123	DNA	d	0.8842	1.25	629
osa-miR808ab	1	96	STOWAWAY1_OS	27	121	DNA	c	0.8646	1.7143	584
osa-miR808b	2	97	STOWAWAY1_OS	27	120	DNA	c	0.8958	1.6	623
osa-miR808c.1	1	96	STOWAWAY1_OS	27	121	DNA	c	0.9167	1.1667	697
osa-miR808c.2	2	79	STOWAWAY1_OS	27	120	DNA	c	0.9012	1.6667	460
osa-miR808c.3	1	94	STOWAWAY1_OS	29	123	DNA	d	0.8737	1.2222	619
osa-miR808c.4	1	71	STOWAWAY1_OS	29	123	DNA	d	0.8889	1	406
osa-miR808d	1	96	STOWAWAY1_OS	29	123	DNA	d	0.9167	1.4	686
osa-miR808e.1	13	52	STOWAWAY50_OS	29	68	DNA	c	0.925	1	302
osa-miR808e.2	18	66	MIDWAY	483	531	DNA/EnSpm/CACTA	c	0.898	1.6667	345
osa-miR808e.3	29	73	STOWAWAY25_OS	34	78	DNA	d	0.9111	2	322
osa-miR808e.4	2	104	STOWAWAY1_OS	27	120	DNA	c	0.8485	1.4286	493
osa-miR808e.5	1	94	STOWAWAY1_OS	29	123	DNA	d	0.8105	2.125	463
osa-miR808e.6	9	95	STOWAWAY1_OS	27	112	DNA	c	0.8506	2	493
osa-miR808f	1	83	STOWAWAY1_OS	29	123	DNA	d	0.8837	1	508
osa-miR808g	3	98	STOWAWAY1_OS	27	119	DNA	c	0.8936	1.2857	630
osa-miR808h	1	96	STOWAWAY1_OS	27	121	DNA	c	0.8854	2.5	603
osa-miR808i.1	1	95	STOWAWAY1_OS	29	123	DNA	d	0.9062	1.75	639
osa-miR808i.2	1	94	STOWAWAY1_OS	29	123	DNA	d	0.9167	1.6667	638
osa-miR808i.3	1	40	STOWAWAY1_OS	86	121	DNA	c	0.9211	1	242
osa-miR808i.4	16	60	STOWAWAY1_OS	27	71	DNA	c	0.9778	1	384
osa-miR808i.5	2	75	STOWAWAY1_OS	27	120	DNA	c	0.9333	1	494
osa-miR808i.6	25	73	STOWAWAY1_OS	27	74	DNA	c	0.8571	1.2	300
osa-miR808i.7	1	72	STOWAWAY1_OS	27	121	DNA	c	0.9041	1.2	423
osa-miR808j	1	94	STOWAWAY1_OS	29	123	DNA	d	0.8842	1.25	632
osa-miR808k	19	70	STOWAWAY1_OS	27	78	DNA	c	0.8846	2	340
osa-miR808l	1	96	STOWAWAY1_OS	29	123	DNA	d	0.8854	1.1111	652
osa-miR808m	1	106	STOWAWAY1_OS	29	123	DNA	d	0.8969	1.3333	607
osa-miR808n	2	95	STOWAWAY1_OS	27	120	DNA	c	0.9053	1.75	632
osa-miR808o	2	122	STOWAWAY1_OS	1	120	DNA	c	0.8843	1.1818	831
osa-miR808o	127	169	STOWAWAY1_OS	27	69	DNA	c	0.9302	1	335
osa-miR808p	2	107	STOWAWAY1_OS	30	123	DNA	d	0.9271	1.25	646
osa-miR808q	5	96	STOWAWAY1_OS	27	117	DNA	c	0.8804	1.6667	586
osa-miR808r	1	89	STOWAWAY1_OS	29	123	DNA	d	0.8791	2	517
osa-miR808s	1	96	STOWAWAY1_OS	29	123	DNA	d	0.9271	1.2	711
osa-miR808t	1	97	STOWAWAY1_OS	27	121	DNA	c	0.7938	2.2857	372
osa-miR808u	1	97	STOWAWAY1_OS	27	121	DNA	c	0.8557	1.5	562
osa-miR808v	1	96	STOWAWAY1_OS	27	121	DNA	c	0.8958	1.125	667
osa-miR808w	2	96	STOWAWAY1_OS	27	120	DNA	c	0.8421	2.3333	513
osa-miR808x	1	96	STOWAWAY1_OS	29	123	DNA	d	0.9167	1.1667	696
osa-miR808y	2	105	STOWAWAY1_OS	30	144	DNA	d	0.9048	1.125	715
osa-miR808y	106	206	STOWAWAY1_OS	27	138	DNA	c	0.9126	1	692
osa-miR808z	1	95	STOWAWAY1_OS	27	121	DNA	c	0.9167	1.5	662
osa-miR809b	1	98	STOWAWAY1_OS	26	122	DNA	c	0.8571	1.3	604
osa-miR809c.1	1	98	STOWAWAY1_OS	28	124	DNA	d	0.9184	1.4	702
osa-miR809d	14	54	STOWAWAY50_OS	28	68	DNA	c	0.9268	1	310
osa-miR809e.1	1	97	STOWAWAY1_OS	28	124	DNA	d	0.9082	1.75	655
osa-miR809e.2	1	98	STOWAWAY1_OS	28	124	DNA	d	0.9082	1.6	678
osa-miR809e.3	1	41	STOWAWAY1_OS	86	122	DNA	c	0.9231	1	250
osa-miR809e.4	1	77	STOWAWAY1_OS	26	122	DNA	c	0.9231	1	506
osa-miR809f	1	97	STOWAWAY1_OS	27	122	DNA	c	0.8454	2.3333	532
osa-miR809g.1	1	98	STOWAWAY1_OS	27	122	DNA	c	0.8571	1.5	570
osa-miR809g.2	5	54	STOWAWAY1_OS	27	76	DNA	c	0.84	2	283
osa-miR809h	1	98	STOWAWAY1_OS	28	124	DNA	d	0.8878	1.1111	668
osa-miR809i	1	108	STOWAWAY1_OS	28	124	DNA	d	0.899	1.3333	623
osa-miR809j	1	42	STOWAWAY1_OS	28	69	DNA	d	0.9048	1.3333	302
osa-miR809k	1	123	STOWAWAY1_OS	1	122	DNA	c	0.878	1.1667	835
osa-miR809k	128	171	STOWAWAY1_OS	26	69	DNA	c	0.9318	1	343
osa-miR809l	1	109	STOWAWAY1_OS	28	124	DNA	d	0.9192	1.2	658
osa-miR809m.1	1	98	STOWAWAY1_OS	26	122	DNA	c	0.9184	1.4	703
osa-miR809m.2	1	98	STOWAWAY1_OS	26	122	DNA	c	0.9082	1.6	680
osa-miR809m.3	1	98	STOWAWAY1_OS	26	122	DNA	c	0.8776	1.2222	642
osa-miR809m.4	1	91	STOWAWAY1_OS	28	124	DNA	d	0.9022	1.3333	616
osa-miR809m.5	1	98	STOWAWAY1_OS	26	122	DNA	c	0.9388	1.6667	733
osa-miR809m.6	1	37	STOWAWAY1_OS	86	122	DNA	c	0.9459	1	299
osa-miR809n	6	98	STOWAWAY1_OS	26	117	DNA	c	0.8817	1.6667	594
osa-miR809o	1	128	STOWAWAY1_OS	26	122	DNA	c	0.87	1.4286	479
osa-miR809p	1	98	STOWAWAY1_OS	26	122	DNA	c	0.8367	1.25	573
osa-miR809q	1	85	STOWAWAY1_OS	26	122	DNA	c	0.9302	1.25	598
osa-miR809r	1	97	STOWAWAY1_OS	28	124	DNA	d	0.9082	1.4	668
osa-miR809s	20	71	STOWAWAY1_OS	27	78	DNA	c	0.8846	2	340
osa-miR809t	1	88	STOWAWAY1_OS	28	124	DNA	d	0.9326	1	644
osa-miR809u	1	98	STOWAWAY1_OS	26	122	DNA	c	0.8776	1.2222	643
osa-miR809v	1	43	STOWAWAY1_OS	77	122	DNA	c	0.8182	1.75	210
osa-miR809w	1	98	STOWAWAY1_OS	26	122	DNA	c	0.8367	2.1429	525
osa-miR809x	1	98	STOWAWAY1_OS	28	124	DNA	d	0.9184	1.1667	712
osa-miR809y	1	97	STOWAWAY1_OS	26	122	DNA	c	0.9184	1.5	678
osa-miR812aa	3	162	STOWAWAY9_OS	35	196	DNA	c	0.9141	1.4286	1128
osa-miR812ab	2	153	STOWAWAY9_OS	42	192	DNA	d	0.9408	1.6	1166
osa-miR812ac	2	163	STOWAWAY51_OS	42	204	DNA/Mariner	c	0.8528	1.25	946
osa-miR812ad	2	159	STOWAWAY51_OS	41	204	DNA/Mariner	c	0.8704	2.125	938
osa-miR812ae	1	164	STOWAWAY9_OS	37	200	DNA	d	0.9273	1.4286	1225
osa-miR812af	1	200	STOWAWAY44_OS	21	221	DNA	d	0.8408	1.55	1184
osa-miR812ag	1	198	STOWAWAY44_OS	20	220	DNA	c	0.86	1.625	1222
osa-miR812ah.1	1	166	STOWAWAY9_OS	35	198	DNA	c	0.9576	1.2	1324
osa-miR812ah.2	1	164	STOWAWAY9_OS	35	198	DNA	c	0.939	1.25	1288
osa-miR812ai	1	157	STOWAWAY9_OS	37	192	DNA	d	0.9363	1.125	1207
osa-miR812aj	1	165	STOWAWAY9_OS	37	200	DNA	d	0.8909	1.4167	1124
osa-miR812ak	2	154	STOWAWAY51_OS	45	199	DNA/Mariner	c	0.9161	2.2	1068
osa-miR812al	2	155	STOWAWAY9_OS	40	192	DNA	c	0.8477	1.9	781
osa-miR812am	1	162	STOWAWAY9_OS	35	198	DNA	c	0.9085	1.0909	1148
osa-miR812an	2	155	STOWAWAY9_OS	35	197	DNA	c	0.9091	1.375	1020
osa-miR812ao	2	143	STOWAWAY9_OS	42	192	DNA	c	0.9296	1.75	963
osa-miR812ap	2	166	STOWAWAY9_OS	35	197	DNA	c	0.903	1.5556	1131
osa-miR812aq	2	155	STOWAWAY51_OS	48	202	DNA/Mariner	d	0.9161	1.7143	1100
osa-miR812ar	3	155	STOWAWAY2_OS	52	209	DNA	d	0.8471	1.7273	814
osa-miR812as	1	160	STOWAWAY44_OS	41	202	DNA	d	0.858	1.4	987
osa-miR812at	1	160	STOWAWAY44_OS	40	200	DNA	c	0.9068	1.2727	1149
osa-miR812au	1	197	STOWAWAY44_OS	21	221	DNA	d	0.85	1.35	1201
osa-miR812av	1	163	STOWAWAY9_OS	36	198	DNA	c	0.9632	1	1358
osa-miR812s	1	155	STOWAWAY9_OS	42	195	DNA	d	0.9484	1.1667	1212
osa-miR812u	1	161	STOWAWAY9_OS	38	198	DNA	d	0.9379	1.25	1256
osa-miR812v.1	1	165	STOWAWAY9_OS	37	200	DNA	d	0.9455	1.1429	1295
osa-miR812v.2	1	164	STOWAWAY9_OS	37	200	DNA	d	0.9333	1.2857	1234
osa-miR812v.3	1	163	STOWAWAY9_OS	37	200	DNA	d	0.9268	1.375	1224
osa-miR812w.1	2	154	STOWAWAY9_OS	40	192	DNA	c	0.9542	1.1667	1235
osa-miR812w.2	3	155	STOWAWAY51_OS	49	202	DNA/Mariner	d	0.9156	1.7143	1091
osa-miR812w.3	2	154	STOWAWAY9_OS	40	192	DNA	c	0.9477	1.3333	1210
osa-miR812x	1	160	STOWAWAY44_OS	40	200	DNA	c	0.8882	1.3077	1094
osa-miR812y	3	155	STOWAWAY51_OS	49	202	DNA/Mariner	d	0.8896	1.6	1023
osa-miR812z.	1	152	STOWAWAY44_OS	44	199	DNA	d	0.8766	1.7	936
osa-miR813b	2	169	NDNA2TNA_OS	88	256	DNA/Harbinger	c	0.9349	2.5	1294
osa-miR814d	1	59	STOWAWAY46_OS	41	102	DNA/Mariner	c	0.8	1.8333	272
osa-miR814e	1	62	STOWAWAY47_OS	43	104	DNA	c	0.871	1.6	396
osa-miR814f	1	59	STOWAWAY46_OS	41	102	DNA/Mariner	c	0.7833	2	249
osa-miR814g	1	62	hAT-N43B_OS	2177	2239	DNA/hAT	c	0.7619	1.1667	313
osa-miR814h	1	63	STOWAWAY47_OS	43	104	DNA	c	0.8889	2	396
osa-miR814i	1	61	STOWAWAY47_OS	44	104	DNA	c	0.8525	1.5	370
osa-miR814j	1	62	STOWAWAY46_OS	43	103	DNA/Mariner	d	0.8226	1.25	344
osa-miR814k	1	62	hAT-N43_OS	1178	1239	DNA/hAT	c	0.871	1.6	416
osa-miR814l	1	63	STOWAWAY46_OS	41	102	DNA/Mariner	c	0.8571	1.1429	396
osa-miR814m	1	62	STOWAWAY15-2_OS	42	103	DNA	c	0.871	1.1429	423
osa-miR814n	1	62	STOWAWAY47_OS	43	104	DNA	c	0.871	1.1429	417
osa-miR814o	1	62	STOWAWAY47_OS	45	106	DNA	d	0.871	1.6	396
osa-miR814p	5	63	hAT-N43B_OS	639	696	DNA/hAT	d	0.8136	2.5	286
osa-miR814q	6	55	STOWAWAY46_OS	48	97	DNA/Mariner	c	0.84	1.6	300
osa-miR816b	1	70	STOWAWAY47_OS	39	108	DNA	c	0.8857	1.1429	487
osa-miR817b	3	52	TNR3	1305	1354	DNA/EnSpm/CACTA	d	0.94	3	404
osa-miR817c	1	149	TNR3	1311	1459	DNA/EnSpm/CACTA	c	0.953	1.1667	1294
osa-miR817c	150	182	ENSPM3_OS	257	289	DNA/EnSpm/CACTA	d	0.8788	4	225
osa-miR818aa	1	86	TREP219	9	94	DNA/Mariner	d	0.9884	1	769
osa-miR818ab	1	26	STOWAWAY46_OS	111	136	DNA/Mariner	c	0.9615	99	201
osa-miR818ab	27	69	STOWAWAY46_OS	96	138	DNA/Mariner	d	0.8605	1	288
osa-miR818ac	6	222	STOWAWAY21_OS	8	225	DNA	c	0.8853	1.2632	1463
osa-miR818ad	1	219	STOWAWAY21_OS	5	225	DNA	d	0.8959	1.4	1508
osa-miR818ae	7	97	STOWAWAY15-2_OS	9	96	DNA	c	0.8222	1.1818	478
osa-miR818af	7	218	STOWAWAY21_OS	7	224	DNA	c	0.8451	2	1189
osa-miR818ag	6	222	STOWAWAY21_OS	7	225	DNA	c	0.9132	1.3077	1550
osa-miR818ah	1	223	STOWAWAY21_OS	9	237	DNA	d	0.8458	1.8667	1181
osa-miR818c	1	130	STOWAWAY46_OS	7	136	DNA/Mariner	c	0.8769	1.2308	886
osa-miR818d	1	225	STOWAWAY21_OS	7	235	DNA	c	0.8982	1.3333	1508
osa-miR818e.1	6	223	STOWAWAY21_OS	7	225	DNA	c	0.8995	1.75	1481
osa-miR818f.1	1	125	STOWAWAY46_OS	7	136	DNA/Mariner	c	0.8651	1.4	735
osa-miR818f.2	1	216	STOWAWAY21_OS	9	226	DNA	d	0.9032	1.3333	1514
osa-miR818h	1	224	STOWAWAY21_OS	7	238	DNA	c	0.8578	1.4	1305
osa-miR818i	1	210	STOWAWAY21_OS	7	235	DNA	c	0.8774	1.2353	1250
osa-miR818j	2	104	STOWAWAY46_OS	8	135	DNA/Mariner	c	0.7757	1.6667	331
osa-miR818k	1	109	STOWAWAY46_OS	7	136	DNA/Mariner	c	0.8091	2	461
osa-miR818l	6	204	STOWAWAY21_OS	7	225	DNA	c	0.8578	1.3333	1130
osa-miR818m	1	136	STOWAWAY1_OS	7	141	DNA	c	0.8162	2	698
osa-miR818n	2	104	STOWAWAY46_OS	8	135	DNA/Mariner	c	0.7477	1.7692	270
osa-miR818o	1	225	STOWAWAY21_OS	9	237	DNA	d	0.9248	1.75	1589
osa-miR818p	1	105	hAT-N43B_OS	2145	2275	DNA/hAT	d	0.8411	1.3636	535
osa-miR818q	1	222	STOWAWAY21_OS	9	237	DNA	d	0.852	1.6111	1242
osa-miR818r	1	136	STOWAWAY1_OS	9	143	DNA	d	0.9118	1.2222	988
osa-miR818s.1	1	86	TREP219	9	94	DNA/Mariner	d	0.9535	1	723
osa-miR818s.2	1	86	TREP219	9	94	DNA/Mariner	d	0.907	1.1429	653
osa-miR818t	1	95	STOWAWAY1_OS	27	122	DNA	c	0.8125	2.125	471
osa-miR818u	6	225	STOWAWAY21_OS	7	225	DNA	c	0.8545	1.2857	1276
osa-miR818v	26	91	STOWAWAY15-2_OS	7	72	DNA	c	0.8788	1.3333	465
osa-miR818w	1	129	STOWAWAY15-2_OS	9	138	DNA	d	0.7846	1.2857	675
osa-miR818x	6	285	STOWAWAY21_OS	7	225	DNA	c	0.8914	1.6154	1199
osa-miR818y	1	59	STOWAWAY21_OS	9	67	DNA	d	0.8983	1.2	438
osa-miR818y	61	129	STOWAWAY21_OS	8	76	DNA	c	0.8841	1.1429	494
osa-miR819a.2-3p	14	55	STOWAWAY50_OS	28	69	DNA	c	0.9286	1.5	310
osa-miR819a.3-3p	1	95	STOWAWAY1_OS	28	123	DNA	d	0.8125	2.125	471
osa-miR819a.4-3p	1	96	STOWAWAY1_OS	27	122	DNA	c	0.8351	2.3333	498
osa-miR819a.5-3p	2	95	STOWAWAY1_OS	27	122	DNA	c	0.8737	1.5714	592
osa-miR819aa.1	1	116	STOWAWAY50_OS	11	166	DNA	d	0.8803	1.8571	578
osa-miR819aa.2	1	116	STOWAWAY50_OS	11	166	DNA	d	0.8889	1.7143	601
osa-miR819aaa	1	96	STOWAWAY1_OS	28	124	DNA	d	0.866	1.5	614
osa-miR819aab	1	97	STOWAWAY1_OS	26	122	DNA	c	0.8673	1.375	597
osa-miR819aac	1	97	STOWAWAY1_OS	26	122	DNA	c	0.898	1.6	644
osa-miR819aad	1	95	STOWAWAY1_OS	27	122	DNA	c	0.8646	1.7143	584
osa-miR819aae	1	105	STOWAWAY1_OS	27	122	DNA	c	0.8416	1.375	497
osa-miR819aaf	1	97	STOWAWAY1_OS	27	122	DNA	c	0.8351	1.875	527
osa-miR819aag	1	91	STOWAWAY1_OS	28	124	DNA	d	0.8817	2	533
osa-miR819aah	1	98	STOWAWAY1_OS	28	124	DNA	d	0.9286	1.2	727
osa-miR819aai	1	98	STOWAWAY1_OS	26	122	DNA	c	0.8571	1.1818	613
osa-miR819aak	1	55	STOWAWAY1_OS	28	82	DNA	d	0.8909	2	364
osa-miR819aal	1	97	STOWAWAY1_OS	27	122	DNA	c	0.8969	1.125	675
osa-miR819aam	14	54	STOWAWAY50_OS	28	68	DNA	c	0.9268	3	292
osa-miR819aan	1	77	STOWAWAY1_OS	27	122	DNA	c	0.8462	1.5714	383
osa-miR819aao	1	98	STOWAWAY1_OS	27	122	DNA	c	0.8673	1.5714	587
osa-miR819aap	1	106	STOWAWAY1_OS	28	144	DNA	d	0.8972	1.1111	719
osa-miR819aap	107	208	STOWAWAY1_OS	26	138	DNA	c	0.9135	1	700
osa-miR819aaq	1	76	STOWAWAY1_OS	28	122	DNA	d	0.8831	2	418
osa-miR819aar	1	95	STOWAWAY1_OS	27	122	DNA	c	0.8333	1.6667	529
osa-miR819aas	1	97	STOWAWAY1_OS	27	122	DNA	c	0.8351	1.6667	535
osa-miR819aat	1	98	STOWAWAY1_OS	28	124	DNA	d	0.8776	1.2222	641
osa-miR819aau.1	1	107	STOWAWAY1_OS	12	140	DNA	d	0.8288	2.5	445
osa-miR819aau.2	1	86	MIDWAY	466	545	DNA/EnSpm/CACTA	c	0.8025	1.3636	400
osa-miR819aav	30	86	STOWAWAY50_OS	12	68	DNA	c	0.9474	1	447
osa-miR819aaw.1	1	29	STOWAWAY50_OS	14	42	DNA	d	0.9655	1	247
osa-miR819aaw.1	30	100	STOWAWAY50_OS	12	82	DNA	c	0.8873	1.6	458
osa-miR819aaw.2	1	129	STOWAWAY50_OS	14	163	DNA	d	0.8258	1.8182	569
osa-miR819aax.1	1	87	MIDWAY	466	545	DNA/EnSpm/CACTA	c	0.8272	1.4444	426
osa-miR819aax.2	1	130	STOWAWAY1_OS	12	140	DNA	d	0.8077	1.6	664
osa-miR819aax.3	1	86	MIDWAY	466	545	DNA/EnSpm/CACTA	c	0.8272	1.4444	430
osa-miR819aay	1	130	STOWAWAY50_OS	12	161	DNA	c	0.8106	1.3529	586
osa-miR819aaz	1	29	STOWAWAY50_OS	14	42	DNA	d	0.931	1	232
osa-miR819ab	1	56	STOWAWAY50_OS	109	164	DNA	c	0.875	1.1667	369
osa-miR819aba	1	107	STOWAWAY50_OS	12	161	DNA	c	0.8704	1.4444	498
osa-miR819abb	1	129	STOWAWAY50_OS	12	161	DNA	c	0.8106	1.6923	536
osa-miR819abc	1	129	STOWAWAY50_OS	12	161	DNA	c	0.803	1.7692	512
osa-miR819abd	35	75	STOWAWAY50_OS	13	53	DNA	c	0.878	1.25	279
osa-miR819abe	1	237	STOWAWAY41_OS	12	251	DNA	c	0.841	2	1257
osa-miR819ac	1	243	STOWAWAY41_OS	9	254	DNA	c	0.8415	2.3333	1256
osa-miR819ad	9	58	STOWAWAY25_OS	39	88	DNA	c	0.84	1.3333	303
osa-miR819ad	72	215	STOWAWAY1_OS	7	149	DNA	c	0.8194	1.9231	757
osa-miR819ae	1	124	STOWAWAY1_OS	7	141	DNA	c	0.808	1.6923	580
osa-miR819af	2	133	STOWAWAY1_OS	10	140	DNA	d	0.7879	2.0769	592
osa-miR819ag	1	130	STOWAWAY1_OS	7	141	DNA	c	0.8496	2.125	719
osa-miR819ah	1	243	STOWAWAY41_OS	11	256	DNA	d	0.8171	1.7826	1170
osa-miR819ai	1	31	STOWAWAY50_OS	11	41	DNA	d	0.9032	1	233
osa-miR819ai	32	112	STOWAWAY50_OS	9	89	DNA	c	0.7531	1.4286	343
osa-miR819aj	1	125	STOWAWAY50_OS	9	164	DNA	c	0.8281	1.3571	556
osa-miR819ak	6	100	STOWAWAY1_OS	26	117	DNA	c	0.8842	1.3333	586
osa-miR819al	1	74	STOWAWAY1_OS	26	122	DNA	c	0.8667	1.125	402
osa-miR819am	1	95	STOWAWAY1_OS	27	122	DNA	c	0.8333	1.875	533
osa-miR819an	1	97	STOWAWAY1_OS	28	123	DNA	d	0.7959	1.5455	436
osa-miR819ao	1	98	STOWAWAY1_OS	28	124	DNA	d	0.898	1.2857	675
osa-miR819ap	1	100	STOWAWAY1_OS	26	122	DNA	c	0.8673	1.3333	610
osa-miR819aq	1	97	STOWAWAY1_OS	27	122	DNA	c	0.8247	1.7778	508
osa-miR819ar.1	1	99	STOWAWAY1_OS	26	122	DNA	c	0.8889	1.5	635
osa-miR819ar.2	1	98	STOWAWAY1_OS	26	122	DNA	c	0.8776	1.375	633
osa-miR819as.1	1	98	STOWAWAY1_OS	26	122	DNA	c	0.9184	1.1667	713
osa-miR819as.2	1	81	STOWAWAY1_OS	26	122	DNA	c	0.8929	1.5	472
osa-miR819as.3	1	96	STOWAWAY1_OS	28	124	DNA	d	0.8763	1.2222	635
osa-miR819as.4	1	97	STOWAWAY1_OS	28	124	DNA	d	0.8673	1.2222	607
osa-miR819as.5	1	73	STOWAWAY1_OS	28	124	DNA	d	0.8919	1	422
osa-miR819at	14	68	STOWAWAY50_OS	28	80	DNA	c	0.8148	1.2857	266
osa-miR819au	1	85	STOWAWAY1_OS	28	124	DNA	d	0.8864	1	524
osa-miR819av	1	100	STOWAWAY1_OS	26	122	DNA	c	0.8878	1.4286	640
osa-miR819aw	1	98	STOWAWAY1_OS	26	122	DNA	c	0.8878	2.5	619
osa-miR819ax	1	98	STOWAWAY1_OS	28	123	DNA	d	0.7857	1.5833	439
osa-miR819ay.1	9	68	STOWAWAY50_OS	28	85	DNA	c	0.7966	1.375	268
osa-miR819ay.3	9	67	STOWAWAY1_OS	62	123	DNA	d	0.8	1.5714	280
osa-miR819ay.4	21	68	STOWAWAY50_OS	28	73	DNA	c	0.8511	1.2	265
osa-miR819az.2	19	71	STOWAWAY1_OS	27	79	DNA	c	0.8868	2	348
osa-miR819l	1	236	STOWAWAY41_OS	9	254	DNA	c	0.8	1.76	1045
osa-miR819m.1	1	134	STOWAWAY1_OS	7	141	DNA	c	0.8519	1.7273	803
osa-miR819m.2	1	121	STOWAWAY1_OS	9	143	DNA	d	0.8049	1.8333	551
osa-miR819n	1	134	STOWAWAY50_OS	9	164	DNA	c	0.8309	1.6154	646
osa-miR819o	1	133	STOWAWAY50_OS	11	164	DNA	c	0.8284	1.6667	579
osa-miR819p.1	27	102	STOWAWAY50_OS	9	82	DNA	c	0.8533	1.25	437
osa-miR819p.2	39	110	STOWAWAY50_OS	9	80	DNA	c	0.8889	2	467
osa-miR819q	1	78	STOWAWAY50_OS	11	88	DNA	d	0.8205	1.4	419
osa-miR819r.1	4	140	STOWAWAY1_OS	7	141	DNA	c	0.8175	1.9167	690
osa-miR819r.2	4	92	STOWAWAY25_OS	9	94	DNA	d	0.8409	1.7143	469
osa-miR819s.1	1	42	STOWAWAY50_OS	11	52	DNA	d	0.9524	2	337
osa-miR819s.2	1	42	STOWAWAY50_OS	11	52	DNA	d	0.9286	1.5	322
osa-miR819s.3	2	136	STOWAWAY50_OS	9	163	DNA	c	0.854	1.6364	702
osa-miR819t	3	106	STOWAWAY25_OS	7	94	DNA	c	0.8667	1.25	494
osa-miR819u	1	146	STOWAWAY50_OS	9	166	DNA	c	0.8403	1.5833	672
osa-miR819v	1	138	STOWAWAY50_OS	8	166	DNA	d	0.8227	1.8333	620
osa-miR819w	1	248	STOWAWAY41_OS	9	254	DNA	c	0.8455	1.7	1298
osa-miR819x	1	136	STOWAWAY1_OS	8	141	DNA	c	0.8088	1.8462	664
osa-miR819y.1	1	136	STOWAWAY1_OS	7	141	DNA	c	0.8529	2.7143	773
osa-miR819y.2	1	135	STOWAWAY1_OS	7	141	DNA	c	0.8456	1.9	765
osa-miR819z	1	136	STOWAWAY50_OS	9	164	DNA	c	0.8116	1.5	609
hvu-miR1117	4	83	EnSpm1_HV	4635	4716	DNA/EnSpm/CACTA	d	0.8293	1.3333	503
hvu-miR1120d	1	150	STOWAWAY1_HV	7	158	DNA	c	0.8808	2.125	1011
hvu-miR1120j	2	149	STOWAWAY1_HV	10	160	DNA	d	0.8333	1.5333	891
hvu-miR1122a	1	68	STOWAWAY1_HV	1	69	DNA	c	0.8406	1.6667	428
hvu-miR1122a	120	193	THALOS_HV	94	164	DNA/Mariner	c	0.8611	1.2857	453
hvu-miR1122b	1	54	TREP216	39	91	DNA/Mariner	d	0.8519	1.4	316
hvu-miR1126b	1	88	THALOS_AT	39	121	DNA/Mariner	d	0.8452	1.2	507
hvu-miR1126c	1	88	STOWAWAY1_HV	37	128	DNA	c	0.8132	1.4	489
hvu-miR1126d	1	88	STOWAWAY1_HV	39	130	DNA	d	0.8132	2	472
hvu-miR1126e	1	60	THALOS_AT	60	119	DNA/Mariner	c	0.8333	1	390
hvu-miR1126e	61	201	STOWAWAY1_HV	1	130	DNA	d	0.8626	1.875	781
hvu-miR1127a	4	120	ICARUS_TM	1	107	DNA/Mariner	d	0.8349	1.4545	605
hvu-miR1127aa	4	100	HADES_TA	1	97	DNA/Mariner	d	0.8866	1.5714	686
hvu-miR1127aaa	1	113	ICARUS_TM	2	104	DNA/Mariner	c	0.7981	1.4286	523
hvu-miR1127ab	4	99	HADES_TA	1	97	DNA/Mariner	c	0.9175	1.4	727
hvu-miR1127ac	3	35	DNA9-N5C_OS	423	455	DNA	c	0.8788	1.3333	230
hvu-miR1127ad.1	4	100	HADES_TA	1	97	DNA/Mariner	d	0.866	1.1818	674
hvu-miR1127ae	4	100	HADES_TA	1	97	DNA/Mariner	d	0.8557	1.4	638
hvu-miR1127af	4	100	HADES_TA	1	97	DNA/Mariner	d	0.8557	1.1667	659
hvu-miR1127ah	4	88	ATHOS_TM	1	85	DNA/Mariner	d	0.9059	4	581
hvu-miR1127aj	15	65	EnSpm-36_SBi	4253	4294	DNA/EnSpm/CACTA	c	0.8636	1	249
hvu-miR1127ak	4	100	HADES_TA	1	97	DNA/Mariner	d	0.8557	1.5556	629
hvu-miR1127al	4	100	HADES_TA	1	97	DNA/Mariner	c	0.8866	1.5714	687
hvu-miR1127am.1	4	100	HADES_TA	1	97	DNA/Mariner	d	0.866	1.4444	653
hvu-miR1127am.2	4	128	TREP216	1	124	DNA/Mariner	d	0.872	1.25	860
hvu-miR1127an.1	4	100	HADES_TA	1	97	DNA/Mariner	d	0.9381	1.5	779
hvu-miR1127an.2	4	100	HADES_TA	1	97	DNA/Mariner	c	0.9072	1.8	716
hvu-miR1127ao	4	100	HADES_TA	1	97	DNA/Mariner	c	0.9485	1.6667	793
hvu-miR1127ap	4	165	STOWAWAY1_HV	1	166	DNA	c	0.8072	1.4211	871
hvu-miR1127aq	4	100	HADES_TA	1	97	DNA/Mariner	d	0.8763	1.0909	699
hvu-miR1127ar.1	4	99	HADES_TA	1	97	DNA/Mariner	d	0.9072	1.1429	723
hvu-miR1127ar.2	4	100	HADES_TA	1	97	DNA/Mariner	c	0.8763	1.3333	677
hvu-miR1127as.1	4	100	HADES_TA	1	97	DNA/Mariner	d	0.8454	1.1538	646
hvu-miR1127as.2	4	131	TREP216	1	127	DNA/Mariner	c	0.875	1.5	869
hvu-miR1127as.3	4	100	HADES_TA	1	97	DNA/Mariner	d	0.8454	1.3636	627
hvu-miR1127at	4	119	TREP216	1	127	DNA/Mariner	c	0.7712	2.5	465
hvu-miR1127au.1	4	65	STOWAWAY43_OS	168	233	DNA	c	0.7742	1.7143	239
hvu-miR1127au.2	4	100	HADES_TA	1	97	DNA/Mariner	d	0.8763	1.2	689
hvu-miR1127av.1	4	32	STOWAWAY48_OS	1	29	DNA	d	0.9655	1	250
hvu-miR1127av.2	3	93	AsDRF1	1180	1265	DNA	c	0.7816	3.75	256
hvu-miR1127aw.1	4	100	HADES_TA	1	97	DNA/Mariner	d	0.8866	1.8333	674
hvu-miR1127aw.2	4	87	HADES_TA	2	97	DNA/Mariner	c	0.8488	1.375	483
hvu-miR1127ax.1	27	73	ICARUS_TM	1	47	DNA/Mariner	c	0.8085	1.8	265
hvu-miR1127ax.2	1	50	Mariner-1_BDi	87	131	DNA/Mariner	c	0.8333	2.5	221
hvu-miR1127ax.2	59	136	ICARUS_TM	1	76	DNA/Mariner	c	0.8182	1.8571	407
hvu-miR1127ay	4	72	AsDRF1	1196	1264	DNA	c	0.7794	1.375	222
hvu-miR1127az.1	4	100	HADES_TA	1	97	DNA/Mariner	d	0.9175	1.1429	759
hvu-miR1127az.2	4	119	TREP216	1	127	DNA/Mariner	d	0.7712	2.2727	470
hvu-miR1127b	1	112	ICARUS_TM	4	103	DNA/Mariner	d	0.7451	1.3333	405
hvu-miR1127c.1	4	172	STOWAWAY1_HV	1	166	DNA	d	0.8795	1.6364	1115
hvu-miR1127c.2	4	172	STOWAWAY1_HV	1	166	DNA	d	0.8855	1.7	1130
hvu-miR1127d.1	4	72	HADES_TA	1	97	DNA/Mariner	d	0.8873	1.5	374
hvu-miR1127d.2	4	100	HADES_TA	1	97	DNA/Mariner	d	0.9072	1.2857	734
hvu-miR1127f	1	112	ICARUS_TM	4	106	DNA/Mariner	d	0.7788	1.4667	488
hvu-miR1127h	4	31	TREP220	82	109	DNA	c	0.9643	1	247
hvu-miR1127h	49	85	STOWAWAY8_OS	1	37	DNA	c	0.8378	1.5	225
hvu-miR1127j	4	119	TREP216	1	127	DNA/Mariner	c	0.7815	2.3	488
hvu-miR1127k	1	88	AsDRF1	1177	1264	DNA	d	0.7586	3.8	256
hvu-miR1127l	35	66	STOWAWAY48_OS	1	32	DNA	c	0.875	1.3333	225
hvu-miR1127m	4	100	HADES_TA	1	97	DNA/Mariner	d	0.8557	1.75	620
hvu-miR1127o	4	167	STOWAWAY1_HV	1	166	DNA	d	0.8909	2.125	1154
hvu-miR1127p	17	55	THALOS_HV	129	164	DNA/Mariner	d	0.9459	1	279
hvu-miR1127q	4	99	HADES_TA	1	97	DNA/Mariner	c	0.7857	1.8889	417
hvu-miR1127r	4	118	ICARUS_TM	2	107	DNA/Mariner	c	0.787	1.3571	470
hvu-miR1127s	4	111	HADES_TA	1	97	DNA/Mariner	c	0.7551	1.4375	409
hvu-miR1127t	4	131	TREP216	1	127	DNA/Mariner	d	0.8828	1.4	893
hvu-miR1127u	1	154	STOWAWAY1_HV	4	161	DNA	d	0.8599	2.1111	964
hvu-miR1127v	4	119	ICARUS_TM	1	107	DNA/Mariner	d	0.7778	2.0909	460
hvu-miR1127w	4	119	ICARUS_TM	1	107	DNA/Mariner	d	0.787	1.4667	523
hvu-miR1127x	4	36	STOWAWAY43_OS	202	233	DNA	c	0.9394	1	245
hvu-miR1127x	50	86	STOWAWAY34_OS	1	40	DNA	c	0.8684	1.3333	233
hvu-miR1127y	4	118	TREP216	1	127	DNA/Mariner	d	0.822	1.3846	619
hvu-miR1127z	4	79	ICARUS_TM	1	76	DNA/Mariner	d	0.8158	1.75	424
hvu-miR1128a	4	165	STOWAWAY1_HV	1	166	DNA	d	0.8485	2.2	977
hvu-miR1128aa	4	163	STOWAWAY1_HV	1	166	DNA	d	0.8827	1.8889	1093
hvu-miR1128aaa	4	167	STOWAWAY1_HV	1	166	DNA	d	0.8788	1.9	1122
hvu-miR1128aab.1	4	166	STOWAWAY1_HV	1	166	DNA	d	0.8424	1.8462	990
hvu-miR1128aab.2	4	166	STOWAWAY1_HV	1	166	DNA	d	0.8424	1.6	1010
hvu-miR1128aac.1	4	163	STOWAWAY1_HV	1	166	DNA	d	0.8659	2.5714	1000
hvu-miR1128aac.2	4	169	STOWAWAY1_HV	1	166	DNA	d	0.8735	2.25	1045
hvu-miR1128aad	4	167	STOWAWAY1_HV	1	166	DNA	c	0.8788	1.4615	1144
hvu-miR1128ab	4	139	STOWAWAY1_HV	29	166	DNA	c	0.8188	1.4286	723
hvu-miR1128ab	144	216	THALOS_AT	1	65	DNA/Mariner	c	0.8507	1.3333	372
hvu-miR1128ac	4	100	HADES_TA	1	97	DNA/Mariner	d	0.8866	2.2	666
hvu-miR1128ad	4	131	TREP216	1	127	DNA/Mariner	d	0.8672	1.4545	854
hvu-miR1128ae	4	166	STOWAWAY1_HV	1	166	DNA	c	0.8253	1.5625	927
hvu-miR1128af	4	118	TREP216	1	127	DNA/Mariner	c	0.839	1.4545	649
hvu-miR1128ag	4	165	THALOS_HV	1	164	DNA/Mariner	d	0.8957	1	1177
hvu-miR1128ah.1	4	100	HADES_TA	1	97	DNA/Mariner	d	0.9278	1.75	754
hvu-miR1128ah.2	4	100	HADES_TA	1	97	DNA/Mariner	c	0.8557	1.75	618
hvu-miR1128ah.3	4	98	HADES_TA	1	96	DNA/Mariner	d	0.9062	2	685
hvu-miR1128ai	4	100	HADES_TA	1	97	DNA/Mariner	d	0.9278	1.75	755
hvu-miR1128aj.1	4	162	STOWAWAY1_HV	1	166	DNA	d	0.8395	1.6429	954
hvu-miR1128aj.2	4	166	STOWAWAY1_HV	1	166	DNA	c	0.8788	1.5	1121
hvu-miR1128ak	4	101	HADES_TA	1	97	DNA/Mariner	c	0.8485	2.4	552
hvu-miR1128al	4	100	HADES_TA	1	97	DNA/Mariner	d	0.866	1.3	666
hvu-miR1128am.1	4	167	THALOS_HV	1	164	DNA/Mariner	c	0.9085	1.3636	1203
hvu-miR1128am.2	4	165	STOWAWAY1_HV	1	166	DNA	d	0.8424	1.9167	967
hvu-miR1128an	5	99	HADES_TA	1	96	DNA/Mariner	c	0.8804	3	545
hvu-miR1128ao	4	163	STOWAWAY1_HV	1	166	DNA	c	0.882	2.5	1004
hvu-miR1128ap.1	4	100	HADES_TA	1	97	DNA/Mariner	c	0.8763	1.7143	658
hvu-miR1128aq	4	100	HADES_TA	1	97	DNA/Mariner	d	0.7938	1.6667	510
hvu-miR1128ar	4	101	HADES_TA	1	97	DNA/Mariner	c	0.8384	2.1667	536
hvu-miR1128at	4	166	THALOS_HV	1	164	DNA/Mariner	c	0.8841	1.3846	1112
hvu-miR1128au	4	164	THALOS_HV	3	164	DNA/Mariner	c	0.8148	1.381	898
hvu-miR1128av	4	107	TREP216	1	127	DNA/Mariner	d	0.8679	4	558
hvu-miR1128aw	4	167	STOWAWAY1_HV	1	166	DNA	c	0.8528	1.4615	950
hvu-miR1128ax	57	88	Helitron-N28B_OS	2469	2500	DNA/Helitron	c	0.875	1.3333	225
hvu-miR1128ay	4	117	ICARUS_TM	3	107	DNA/Mariner	c	0.7736	1.6429	475
hvu-miR1128az	4	168	STOWAWAY1_HV	1	166	DNA	d	0.8795	1.6364	1131
hvu-miR1128b	4	120	ICARUS_TM	1	107	DNA/Mariner	d	0.8241	1.2857	609
hvu-miR1128c	4	111	HADES_TA	1	97	DNA/Mariner	c	0.8061	1.8	473
hvu-miR1128d	88	116	EnSpm-N2_TA	6558	6586	DNA/EnSpm/CACTA	c	0.8966	1	223
hvu-miR1128e	4	100	HADES_TA	1	97	DNA/Mariner	c	0.8557	1.5556	628
hvu-miR1128f	4	138	STOWAWAY1_HV	1	166	DNA	c	0.8633	1.6667	750
hvu-miR1128g	4	101	HADES_TA	1	97	DNA/Mariner	d	0.8283	2	521
hvu-miR1128h.2	4	100	HADES_TA	1	97	DNA/Mariner	c	0.8866	1.375	693
hvu-miR1128i.1	4	44	STOWAWAY1_HV	127	166	DNA	c	0.9512	1	316
hvu-miR1128i.2	4	164	STOWAWAY1_HV	1	166	DNA	d	0.8659	1.5	1037
hvu-miR1128i.3	4	172	STOWAWAY1_HV	1	166	DNA	d	0.8795	2	1095
hvu-miR1128i.4	4	166	THALOS_HV	1	164	DNA/Mariner	d	0.8598	1.375	1038
hvu-miR1128j.1	4	101	HADES_TA	1	97	DNA/Mariner	c	0.8384	2.6	525
hvu-miR1128j.2	4	101	HADES_TA	1	97	DNA/Mariner	c	0.8384	2.1667	535
hvu-miR1128j.3	4	101	HADES_TA	1	97	DNA/Mariner	c	0.7959	3.1667	449
hvu-miR1128k	4	101	HADES_TA	1	97	DNA/Mariner	d	0.79	1.3333	449
hvu-miR1128l	4	131	TREP216	1	127	DNA/Mariner	c	0.8516	1.6364	803
hvu-miR1128m	4	131	TREP216	1	127	DNA/Mariner	d	0.8281	1.9091	729
hvu-miR1128n	4	101	HADES_TA	1	97	DNA/Mariner	c	0.8283	1.7143	485
hvu-miR1128o	4	101	HADES_TA	1	97	DNA/Mariner	d	0.8182	1.5	452
hvu-miR1128p	47	158	TREP216	17	127	DNA/Mariner	d	0.875	1.4444	749
hvu-miR1128q	4	170	STOWAWAY1_HV	1	166	DNA	d	0.8916	2	1127
hvu-miR1128r.1	4	167	STOWAWAY1_HV	1	166	DNA	c	0.9091	2.3333	1203
hvu-miR1128r.2	3	26	EnSpm-N1_HV	5781	5804	DNA/EnSpm/CACTA	c	1	99	216
hvu-miR1128r.2	27	78	STOWAWAY1_HV	1	52	DNA	c	0.9038	5	360
hvu-miR1128s	5	167	THALOS_HV	2	164	DNA/Mariner	d	0.8712	1.5	1074
hvu-miR1128t	4	88	HADES_TA	1	97	DNA/Mariner	d	0.8506	1.375	491
hvu-miR1128u	4	168	STOWAWAY1_HV	1	166	DNA	d	0.8323	1.8462	933
hvu-miR1128v.1	4	166	STOWAWAY1_HV	1	166	DNA	d	0.8545	2.2	1020
hvu-miR1128v.2	4	166	STOWAWAY1_HV	1	166	DNA	d	0.8424	2.4	974
hvu-miR1128v.3	4	162	STOWAWAY1_HV	1	166	DNA	d	0.8571	1.6154	1013
hvu-miR1128w	4	100	HADES_TA	1	97	DNA/Mariner	c	0.9381	1.5	778
hvu-miR1128x	4	167	STOWAWAY1_HV	1	166	DNA	c	0.8545	1.5333	1066
hvu-miR1128y.1	4	101	HADES_TA	1	97	DNA/Mariner	d	0.81	1.75	465
hvu-miR1128y.2	4	100	HADES_TA	1	97	DNA/Mariner	c	0.9072	1.2857	733
hvu-miR1128z	4	155	STOWAWAY1_HV	1	166	DNA	d	0.8961	2	1039
hvu-miR1130c	50	81	Mariner-N9_OS	208	239	DNA/Mariner	d	0.9062	3	227
hvu-miR1132b	20	69	STOWAWAY1_HV	3	52	DNA	c	0.9	5	344
hvu-miR1132c	1	92	HADES_TA	3	93	DNA/Mariner	c	0.828	2.6	476
hvu-miR1133a	5	102	HADES_TA	1	97	DNA/Mariner	d	0.8485	2.4	551
hvu-miR1133aa	5	101	HADES_TA	1	97	DNA/Mariner	d	0.8557	1.5556	629
hvu-miR1133ab	5	73	HADES_TA	1	97	DNA/Mariner	d	0.8873	1.5	374
hvu-miR1133ac	5	103	HADES_TA	1	97	DNA/Mariner	d	0.8367	1.3636	591
hvu-miR1133ad	5	91	HADES_TA	11	97	DNA/Mariner	c	0.8506	1.3	564
hvu-miR1133af	7	78	HADES_TA	1	95	DNA/Mariner	c	0.8553	1.75	351
hvu-miR1133ag.1	5	100	HADES_TA	1	97	DNA/Mariner	d	0.9072	1.1429	723
hvu-miR1133ag.2	5	101	HADES_TA	1	97	DNA/Mariner	d	0.9072	1.125	743
hvu-miR1133ah	5	118	ICARUS_TM	3	107	DNA/Mariner	c	0.7736	1.6429	475
hvu-miR1133ai	5	120	TREP216	1	127	DNA/Mariner	c	0.7712	2.5	465
hvu-miR1133ak	5	33	STOWAWAY48_OS	1	29	DNA	d	0.9655	1	250
hvu-miR1133al	6	119	ICARUS_TM	2	106	DNA/Mariner	d	0.7925	1.3333	519
hvu-miR1133am	5	108	HADES_TA	1	97	DNA/Mariner	c	0.8384	1.3	549
hvu-miR1133an	5	121	ICARUS_TM	1	107	DNA/Mariner	d	0.8349	1.4545	605
hvu-miR1133ao	8	133	TREP216	1	124	DNA/Mariner	c	0.8571	1.2308	817
hvu-miR1133ap	5	163	STOWAWAY1_HV	1	161	DNA	d	0.875	1.5833	1097
hvu-miR1133aq	5	168	THALOS_HV	1	164	DNA/Mariner	c	0.8537	1.2632	1057
hvu-miR1133ar.1	5	101	HADES_TA	1	97	DNA/Mariner	d	0.9278	1.75	754
hvu-miR1133ar.2	5	101	HADES_TA	1	97	DNA/Mariner	c	0.8557	1.75	618
hvu-miR1133ar.3	5	99	HADES_TA	1	96	DNA/Mariner	d	0.9062	2	685
hvu-miR1133as	5	120	ICARUS_TM	1	107	DNA/Mariner	d	0.7778	2.0909	460
hvu-miR1133at.1	5	102	HADES_TA	1	97	DNA/Mariner	c	0.8485	2.4	552
hvu-miR1133at.2	5	102	HADES_TA	1	97	DNA/Mariner	c	0.8384	2.6	527
hvu-miR1133au	5	80	ICARUS_TM	1	76	DNA/Mariner	d	0.8158	1.75	424
hvu-miR1133av	5	101	HADES_TA	1	97	DNA/Mariner	c	0.9072	1.5	723
hvu-miR1133aw	5	100	HADES_TA	1	97	DNA/Mariner	c	0.9175	1.4	727
hvu-miR1133b	5	32	TREP220	82	109	DNA	c	0.9643	1	247
hvu-miR1133b	50	86	STOWAWAY8_OS	1	37	DNA	c	0.8378	1.5	225
hvu-miR1133c.1	5	170	THALOS_HV	1	164	DNA/Mariner	c	0.8485	1.2632	1023
hvu-miR1133c.2	5	167	THALOS_HV	1	164	DNA/Mariner	d	0.8598	1.375	1038
hvu-miR1133d	5	119	TREP216	1	127	DNA/Mariner	c	0.7265	1.6471	366
hvu-miR1133e.1	5	101	HADES_TA	1	97	DNA/Mariner	c	0.8367	1.1667	592
hvu-miR1133e.2	5	101	HADES_TA	1	97	DNA/Mariner	c	0.9072	1.8	716
hvu-miR1133e.3	5	101	HADES_TA	1	97	DNA/Mariner	c	0.8866	1.5714	685
hvu-miR1133e.4	5	101	HADES_TA	1	97	DNA/Mariner	c	0.8469	1.1818	607
hvu-miR1133f	5	102	HADES_TA	1	97	DNA/Mariner	c	0.8384	2.1667	536
hvu-miR1133g	5	101	HADES_TA	1	97	DNA/Mariner	d	0.9072	1.2857	734
hvu-miR1133h	5	88	HADES_TA	1	97	DNA/Mariner	d	0.8588	1.2222	515
hvu-miR1133i	5	101	HADES_TA	1	97	DNA/Mariner	d	0.8763	1.2	689
hvu-miR1133j	36	67	STOWAWAY48_OS	1	32	DNA	c	0.875	1.3333	225
hvu-miR1133k	5	101	HADES_TA	1	97	DNA/Mariner	d	0.8557	1.75	620
hvu-miR1133l	5	100	HADES_TA	1	97	DNA/Mariner	c	0.8763	1.375	654
hvu-miR1133m	5	167	STOWAWAY1_HV	1	166	DNA	c	0.8364	1.5625	989
hvu-miR1133n	5	100	HADES_TA	1	97	DNA/Mariner	c	0.7857	1.8889	417
hvu-miR1133o	5	132	TREP216	1	127	DNA/Mariner	d	0.8828	1.4	893
hvu-miR1133p	5	119	TREP216	1	127	DNA/Mariner	d	0.8136	1.3571	604
hvu-miR1133q	5	102	HADES_TA	1	97	DNA/Mariner	c	0.8283	1.75	530
hvu-miR1133r	5	121	ICARUS_TM	1	107	DNA/Mariner	d	0.8056	1.4286	559
hvu-miR1133s	5	119	ICARUS_TM	1	107	DNA/Mariner	c	0.7523	1.6	417
hvu-miR1133t	5	119	TREP216	1	127	DNA/Mariner	d	0.822	1.3846	619
hvu-miR1133u	5	101	HADES_TA	1	97	DNA/Mariner	c	0.8557	1.0769	668
hvu-miR1133v	5	101	HADES_TA	1	97	DNA/Mariner	d	0.8557	1.1667	661
hvu-miR1133w	26	112	HADES_TA	11	97	DNA/Mariner	d	0.8736	1.375	596
hvu-miR1133y	5	101	HADES_TA	1	97	DNA/Mariner	d	0.866	1.625	644
hvu-miR1133z	5	101	HADES_TA	1	97	DNA/Mariner	c	0.8866	1.375	693
hvu-miR1135c	1	100	ICARUS_TM	10	100	DNA/Mariner	d	0.7717	1.5385	402
hvu-miR1136	1	54	ICARUS_TM	23	76	DNA/Mariner	d	0.8148	1.6667	299
hvu-miR1137a	1	53	HADES_TA	22	74	DNA/Mariner	c	0.8519	3	282
hvu-miR1320	4	101	HADES_TA	1	97	DNA/Mariner	c	0.8384	2.6	527
hvu-miR1436a.2	29	59	STOWAWAY48_OS	2	32	DNA	c	0.871	1.3333	217
hvu-miR1436aa	1	100	HADES_TA	2	94	DNA/Mariner	c	0.8316	1.3	514
hvu-miR1436aaa.1	1	124	TREP216	4	126	DNA/Mariner	d	0.8145	1.375	719
hvu-miR1436aaa.2	3	127	TREP216	2	124	DNA/Mariner	c	0.856	1.2308	809
hvu-miR1436ab	1	159	STOWAWAY1_HV	4	165	DNA	d	0.8137	1.75	886
hvu-miR1436ac	1	158	STOWAWAY1_HV	4	165	DNA	d	0.8447	2.2	942
hvu-miR1436ad	1	113	ICARUS_TM	4	106	DNA/Mariner	d	0.8286	1.4545	570
hvu-miR1436ae	1	81	TREP220	4	108	DNA	d	0.8095	1.8333	292
hvu-miR1436af	1	123	TREP216	3	124	DNA/Mariner	c	0.878	1.5556	841
hvu-miR1436ag	1	160	STOWAWAY1_HV	2	163	DNA	c	0.8634	1.75	1049
hvu-miR1436ah	42	68	STOWAWAY48_OS	234	260	DNA	d	0.963	1	240
hvu-miR1436ai	4	111	TREP216	2	121	DNA/Mariner	c	0.8468	1.5556	614
hvu-miR1436aj.1	1	86	AsDRF1	1181	1261	DNA	c	0.7683	3.75	214
hvu-miR1436ak	1	30	STOWAWAY43_OS	202	230	DNA	c	0.9333	1	218
hvu-miR1436ak	44	80	STOWAWAY34_OS	1	40	DNA	c	0.8684	1.3333	233
hvu-miR1436al	1	120	TREP216	4	126	DNA/Mariner	d	0.8264	1.4615	687
hvu-miR1436am	1	113	ICARUS_TM	2	104	DNA/Mariner	c	0.7885	1.3125	517
hvu-miR1436an.1	1	93	HADES_TA	4	96	DNA/Mariner	d	0.8387	1.25	599
hvu-miR1436ao.1	1	160	STOWAWAY1_HV	4	165	DNA	d	0.882	1.6364	1124
hvu-miR1436ao.10	1	159	STOWAWAY1_HV	2	163	DNA	c	0.8509	1.5714	1007
hvu-miR1436ao.11	1	159	STOWAWAY1_HV	4	165	DNA	d	0.8519	1.6667	986
hvu-miR1436ao.12	31	101	THALOS_HV	93	163	DNA/Mariner	d	0.9296	1.6667	553
hvu-miR1436ao.13	1	160	STOWAWAY1_HV	2	163	DNA	c	0.8323	1.4444	988
hvu-miR1436ao.14	1	160	STOWAWAY1_HV	4	165	DNA	d	0.8509	1.5333	1041
hvu-miR1436ao.15	1	159	STOWAWAY1_HV	2	163	DNA	c	0.882	2.4286	1066
hvu-miR1436ao.16	1	159	STOWAWAY1_HV	2	163	DNA	c	0.8571	1.6154	1023
hvu-miR1436ao.17	1	155	STOWAWAY1_HV	4	165	DNA	d	0.8535	1.6154	978
hvu-miR1436ao.18	1	160	STOWAWAY1_HV	2	163	DNA	c	0.8696	1.8182	1066
hvu-miR1436ao.19	23	58	EnSpm-N1_HV	5767	5802	DNA/EnSpm/CACTA	d	0.9167	1.5	276
hvu-miR1436ao.2	1	160	STOWAWAY1_HV	4	165	DNA	d	0.8509	1.7692	1020
hvu-miR1436ao.20	1	160	STOWAWAY1_HV	4	165	DNA	d	0.882	1.5	1134
hvu-miR1436ao.21	1	160	STOWAWAY1_HV	2	163	DNA	c	0.8571	1.6923	1035
hvu-miR1436ao.22	1	163	STOWAWAY1_HV	4	165	DNA	d	0.8889	2	1092
hvu-miR1436ao.23	1	159	STOWAWAY1_HV	4	165	DNA	d	0.858	1.5833	995
hvu-miR1436ao.28	1	160	STOWAWAY1_HV	4	165	DNA	d	0.8882	2.125	1119
hvu-miR1436ao.29	1	160	STOWAWAY1_HV	2	163	DNA	c	0.9068	2.3333	1168
hvu-miR1436ao.3	2	158	STOWAWAY1_HV	2	161	DNA	c	0.8679	2.1111	1015
hvu-miR1436ao.30	1	159	STOWAWAY1_HV	4	165	DNA	d	0.8571	2.1	1007
hvu-miR1436ao.31	1	160	THALOS_HV	4	163	DNA/Mariner	d	0.8688	1.5	1047
hvu-miR1436ao.32	1	133	STOWAWAY1_HV	29	163	DNA	c	0.8148	1.4286	696
hvu-miR1436ao.32	138	209	THALOS_AT	2	65	DNA/Mariner	c	0.8485	1.3333	364
hvu-miR1436ao.33	1	160	THALOS_HV	2	161	DNA/Mariner	c	0.875	1.4286	1072
hvu-miR1436ao.34	1	159	THALOS_HV	4	163	DNA/Mariner	d	0.875	1.4615	1054
hvu-miR1436ao.35	1	148	STOWAWAY1_HV	4	165	DNA	d	0.8933	2	1004
hvu-miR1436ao.36	1	160	STOWAWAY1_HV	2	163	DNA	c	0.8395	1.7143	977
hvu-miR1436ao.37	1	159	THALOS_HV	4	163	DNA/Mariner	d	0.8562	1.375	1003
hvu-miR1436ao.38	65	114	THALOS_HV	111	163	DNA/Mariner	d	0.8235	2.6667	253
hvu-miR1436ao.39	1	158	STOWAWAY1_HV	2	163	DNA	c	0.8758	1.7	1050
hvu-miR1436ao.4	1	160	THALOS_HV	2	161	DNA/Mariner	c	0.8688	1.5	1047
hvu-miR1436ao.40	1	58	STOWAWAY1_HV	106	163	DNA	c	0.9655	2	492
hvu-miR1436ao.40	59	210	STOWAWAY1_HV	12	165	DNA	d	0.902	3.5	1078
hvu-miR1436ao.41	1	161	STOWAWAY1_HV	4	165	DNA	d	0.9012	2	1155
hvu-miR1436ao.5	1	164	STOWAWAY1_HV	4	165	DNA	d	0.8765	1.5455	1066
hvu-miR1436ao.6	1	159	STOWAWAY1_HV	2	163	DNA	c	0.8063	1.6875	811
hvu-miR1436ao.7	1	160	THALOS_HV	4	163	DNA/Mariner	d	0.85	1.6	984
hvu-miR1436ao.8	1	159	STOWAWAY1_HV	4	165	DNA	d	0.8519	1.5385	980
hvu-miR1436ao.9	1	158	STOWAWAY1_HV	4	165	DNA	d	0.8571	1.8182	999
hvu-miR1436ap	1	93	HADES_TA	4	96	DNA/Mariner	d	0.8602	1.8571	619
hvu-miR1436aq	1	93	HADES_TA	4	96	DNA/Mariner	d	0.9032	1.2857	699
hvu-miR1436ar.1	1	93	HADES_TA	2	94	DNA/Mariner	c	0.9032	1.2857	699
hvu-miR1436ar.10	1	93	HADES_TA	4	96	DNA/Mariner	d	0.871	1.3333	644
hvu-miR1436ar.11	1	93	HADES_TA	4	96	DNA/Mariner	d	0.8495	1.4	603
hvu-miR1436ar.12	1	94	HADES_TA	4	96	DNA/Mariner	d	0.7895	1.8889	427
hvu-miR1436ar.13	23	51	HADES_TA	2	30	DNA/Mariner	c	0.9655	99	249
hvu-miR1436ar.14	1	94	HADES_TA	2	94	DNA/Mariner	c	0.8316	1.8333	465
hvu-miR1436ar.15	1	93	HADES_TA	4	96	DNA/Mariner	d	0.8817	1.8333	639
hvu-miR1436ar.16	1	94	HADES_TA	4	96	DNA/Mariner	d	0.8105	1.5	417
hvu-miR1436ar.17	1	93	HADES_TA	2	94	DNA/Mariner	c	0.9032	1.8	681
hvu-miR1436ar.18	1	94	HADES_TA	2	94	DNA/Mariner	c	0.8438	1.6667	506
hvu-miR1436ar.19	1	93	HADES_TA	2	94	DNA/Mariner	c	0.9247	1.4	728
hvu-miR1436ar.2	1	104	HADES_TA	4	96	DNA/Mariner	d	0.8632	2.5	514
hvu-miR1436ar.20	1	93	HADES_TA	4	96	DNA/Mariner	d	0.8817	2.2	631
hvu-miR1436ar.21	1	92	HADES_TA	4	96	DNA/Mariner	d	0.9032	1.1429	688
hvu-miR1436ar.22	1	93	HADES_TA	2	94	DNA/Mariner	c	0.914	1.1429	723
hvu-miR1436ar.3	1	93	HADES_TA	4	96	DNA/Mariner	d	0.9247	1.75	719
hvu-miR1436ar.4	1	93	HADES_TA	2	94	DNA/Mariner	c	0.914	1.3333	713
hvu-miR1436ar.5	1	92	HADES_TA	2	94	DNA/Mariner	c	0.8764	3	518
hvu-miR1436ar.6	1	93	HADES_TA	2	94	DNA/Mariner	c	0.871	1.7143	623
hvu-miR1436ar.7	1	93	HADES_TA	2	94	DNA/Mariner	c	0.8495	1.75	583
hvu-miR1436ar.8	1	93	HADES_TA	4	96	DNA/Mariner	d	0.8602	1.3	631
hvu-miR1436as.1	1	94	HADES_TA	4	96	DNA/Mariner	d	0.7812	1.3333	414
hvu-miR1436as.2	1	93	HADES_TA	2	94	DNA/Mariner	c	0.9032	1.2857	698
hvu-miR1436as.3	1	103	HADES_TA	2	94	DNA/Mariner	c	0.883	1.25	621
hvu-miR1436as.4	1	93	HADES_TA	2	94	DNA/Mariner	c	0.8925	1.1111	692
hvu-miR1436at.1	1	94	HADES_TA	4	96	DNA/Mariner	d	0.8316	2.6	491
hvu-miR1436at.2	79	107	STOWAWAY51_OS	3	31	DNA/Mariner	c	0.931	2	231
hvu-miR1436at.3	1	95	HADES_TA	4	96	DNA/Mariner	d	0.7917	2	420
hvu-miR1436at.4	1	94	HADES_TA	2	94	DNA/Mariner	c	0.8333	1.8333	482
hvu-miR1436at.5	1	94	HADES_TA	4	96	DNA/Mariner	d	0.8421	2.4	516
hvu-miR1436at.6	1	93	HADES_TA	4	96	DNA/Mariner	d	0.8602	1.4444	617
hvu-miR1436au.1	1	93	HADES_TA	4	96	DNA/Mariner	d	0.9355	1.5	744
hvu-miR1436au.2	1	93	HADES_TA	4	96	DNA/Mariner	d	0.8817	1.5714	651
hvu-miR1436au.3	4	93	HADES_TA	2	91	DNA/Mariner	c	0.8667	1.0909	633
hvu-miR1436au.4	1	93	HADES_TA	4	96	DNA/Mariner	d	0.871	1.7143	626
hvu-miR1436au.5	1	93	HADES_TA	4	96	DNA/Mariner	d	0.8925	1.4286	674
hvu-miR1436au.6	1	93	HADES_TA	4	96	DNA/Mariner	d	0.9032	1.5	690
hvu-miR1436au.7	1	93	HADES_TA	4	96	DNA/Mariner	d	0.9032	1.5	689
hvu-miR1436av.1	1	124	TREP216	2	124	DNA/Mariner	c	0.871	1.25	852
hvu-miR1436av.2	1	121	TREP216	4	126	DNA/Mariner	d	0.8361	1.6364	707
hvu-miR1436av.3	1	124	TREP216	4	126	DNA/Mariner	d	0.879	1.4	858
hvu-miR1436aw.1	1	93	HADES_TA	2	94	DNA/Mariner	c	0.9462	1.6667	758
hvu-miR1436aw.2	1	93	HADES_TA	2	94	DNA/Mariner	c	0.8495	1.5556	593
hvu-miR1436ax	1	83	HADES_TA	4	96	DNA/Mariner	d	0.7765	2.6667	295
hvu-miR1436ay.1	1	93	HADES_TA	2	94	DNA/Mariner	c	0.9032	1.125	708
hvu-miR1436ay.2	1	65	HADES_TA	4	96	DNA/Mariner	d	0.8806	1.5	339
hvu-miR1436ay.3	1	93	HADES_TA	4	96	DNA/Mariner	d	0.9355	1.2	754
hvu-miR1436b.2	1	93	HADES_TA	2	94	DNA/Mariner	c	0.8602	1.625	609
hvu-miR1436c.1	1	159	STOWAWAY1_HV	4	165	DNA	d	0.8261	1.7333	926
hvu-miR1436c.2	1	162	STOWAWAY1_HV	4	165	DNA	d	0.8704	2.25	1010
hvu-miR1436f	1	97	HADES_TA	2	94	DNA/Mariner	c	0.8021	1.75	421
hvu-miR1436g	42	71	TREP220	3	32	DNA	c	0.9333	2	242
hvu-miR1436h	19	104	HADES_TA	11	96	DNA/Mariner	d	0.8721	1.375	588
hvu-miR1436j	1	70	HADES_TA	2	94	DNA/Mariner	c	0.8514	1.75	332
hvu-miR1436k	1	78	STOWAWAY27_OS	1	88	DNA	c	0.7375	1.3846	245
hvu-miR1436l.2	1	66	AsDRF1	1196	1261	DNA	c	0.7846	1.4286	210
hvu-miR1436m.1	1	124	TREP216	2	124	DNA/Mariner	c	0.8468	1.6364	768
hvu-miR1436m.2	1	124	TREP216	4	126	DNA/Mariner	d	0.8629	1.4545	819
hvu-miR1436n	1	94	HADES_TA	2	94	DNA/Mariner	c	0.8316	2.1667	501
hvu-miR1436o.1	1	93	HADES_TA	4	96	DNA/Mariner	d	0.9032	1.125	708
hvu-miR1436o.2	1	94	HADES_TA	2	94	DNA/Mariner	c	0.7789	2	406
hvu-miR1436q	1	92	HADES_TA	4	94	DNA/Mariner	d	0.8404	1.6667	488
hvu-miR1436r	1	81	AsDRF1	1183	1263	DNA	d	0.75	3.6	220
hvu-miR1436s	1	165	STOWAWAY1_HV	4	165	DNA	d	0.8765	2	1060
hvu-miR1436w	1	93	HADES_TA	2	94	DNA/Mariner	c	0.8817	1.5714	650
hvu-miR1436y.1	1	160	STOWAWAY1_HV	2	163	DNA	c	0.882	2	1094
hvu-miR1436y.2	21	71	STOWAWAY1_HV	2	52	DNA	c	0.902	5	352
hvu-miR1439a.1	13	51	HADES_TA	62	97	DNA/Mariner	d	0.9459	99	275
hvu-miR1439a.2	1	97	HADES_TA	1	97	DNA/Mariner	c	0.8763	1.7143	658
hvu-miR1439a.3	1	108	HADES_TA	1	97	DNA/Mariner	d	0.8687	2.5	549
hvu-miR1439a.4	1	97	HADES_TA	1	97	DNA/Mariner	d	0.9278	1.75	754
hvu-miR1439a.5	1	97	HADES_TA	1	97	DNA/Mariner	c	0.8557	1.75	618
hvu-miR1439a.6	1	96	HADES_TA	1	97	DNA/Mariner	c	0.9175	1.4	727
hvu-miR1439a.7	1	97	HADES_TA	1	97	DNA/Mariner	d	0.8866	1.8333	674
hvu-miR1439aa	1	97	HADES_TA	1	97	DNA/Mariner	c	0.9072	1.2857	733
hvu-miR1439aaa	1	163	STOWAWAY1_HV	1	166	DNA	d	0.8614	1.5833	1030
hvu-miR1439aab.1	1	163	THALOS_HV	1	164	DNA/Mariner	d	0.878	1.4615	1089
hvu-miR1439aab.2	1	52	STOWAWAY1_HV	115	166	DNA	c	0.9038	5	360
hvu-miR1439aab.3	1	169	STOWAWAY1_HV	1	166	DNA	d	0.8795	1.6364	1115
hvu-miR1439aab.4	1	169	STOWAWAY1_HV	1	166	DNA	d	0.8855	1.7	1130
hvu-miR1439aab.5	1	168	STOWAWAY1_HV	1	166	DNA	d	0.8795	1.5455	1101
hvu-miR1439aab.6	1	164	STOWAWAY1_HV	1	166	DNA	c	0.8364	1.4444	1023
hvu-miR1439aab.7	1	164	STOWAWAY1_HV	1	166	DNA	d	0.8909	2.125	1154
hvu-miR1439aab.8	1	163	STOWAWAY1_HV	1	166	DNA	d	0.8606	2.1	1042
hvu-miR1439aac	1	163	STOWAWAY1_HV	1	166	DNA	d	0.8303	1.7333	961
hvu-miR1439aad	1	164	STOWAWAY1_HV	1	166	DNA	c	0.8848	2	1129
hvu-miR1439aae	1	104	HADES_TA	1	97	DNA/Mariner	c	0.8384	1.3	549
hvu-miR1439aaf	68	118	THALOS_HV	111	164	DNA/Mariner	d	0.8269	2.6667	261
hvu-miR1439ab	1	98	HADES_TA	1	97	DNA/Mariner	d	0.81	1.75	465
hvu-miR1439ac	1	164	THALOS_HV	1	164	DNA/Mariner	c	0.878	1.5385	1098
hvu-miR1439ad	1	128	TREP216	1	127	DNA/Mariner	d	0.8906	1.625	899
hvu-miR1439ae	1	97	HADES_TA	1	97	DNA/Mariner	c	0.8969	1.1111	727
hvu-miR1439af.1	1	162	STOWAWAY1_HV	1	166	DNA	c	0.8727	2.25	1048
hvu-miR1439af.2	1	159	STOWAWAY1_HV	1	166	DNA	c	0.8598	2.25	977
hvu-miR1439af.3	1	159	STOWAWAY1_HV	1	166	DNA	c	0.8659	2.125	989
hvu-miR1439ag	1	164	STOWAWAY1_HV	1	166	DNA	c	0.8727	1.8182	1101
hvu-miR1439ah	1	163	THALOS_HV	2	164	DNA/Mariner	c	0.8712	1.5	1074
hvu-miR1439ai	1	163	STOWAWAY1_HV	1	166	DNA	d	0.8121	1.7059	906
hvu-miR1439aj.1	1	25	EnSpm-N1_HV	5779	5803	DNA/EnSpm/CACTA	c	0.92	1	201
hvu-miR1439aj.1	26	62	EnSpm-N1_HV	5767	5803	DNA/EnSpm/CACTA	d	0.9189	1.5	285
hvu-miR1439aj.2	1	152	STOWAWAY1_HV	1	166	DNA	d	0.8961	2	1039
hvu-miR1439ak	1	163	STOWAWAY1_HV	1	166	DNA	d	0.8182	2	903
hvu-miR1439al	57	88	hAT-N7B_OS	2312	2343	DNA/hAT	d	0.9375	99	247
hvu-miR1439am.2	1	98	HADES_TA	1	97	DNA/Mariner	c	0.8384	2.6	527
hvu-miR1439ao	1	98	HADES_TA	1	97	DNA/Mariner	c	0.84	1.8333	517
hvu-miR1439ap	1	97	HADES_TA	1	97	DNA/Mariner	c	0.9175	1.3333	748
hvu-miR1439aq	1	159	STOWAWAY1_HV	1	166	DNA	d	0.8395	1.6429	954
hvu-miR1439ar.1	1	97	HADES_TA	1	97	DNA/Mariner	d	0.866	1.3	666
hvu-miR1439ar.2	26	55	HADES_TA	1	30	DNA/Mariner	c	0.9667	99	257
hvu-miR1439as	1	98	HADES_TA	1	97	DNA/Mariner	d	0.8485	2.4	551
hvu-miR1439at.1	1	164	THALOS_HV	1	164	DNA/Mariner	c	0.878	1.4286	1107
hvu-miR1439at.2	1	164	STOWAWAY1_HV	1	166	DNA	c	0.8434	1.7143	1012
hvu-miR1439au.1	1	97	HADES_TA	1	97	DNA/Mariner	d	0.8367	1.1667	595
hvu-miR1439au.2	1	97	HADES_TA	1	97	DNA/Mariner	c	0.9175	1.1429	758
hvu-miR1439au.3	1	97	HADES_TA	1	97	DNA/Mariner	c	0.9072	1.8	716
hvu-miR1439av	3	99	HADES_TA	1	97	DNA/Mariner	c	0.9485	1.6667	793
hvu-miR1439aw.1	1	163	STOWAWAY1_HV	1	166	DNA	c	0.811	1.6875	846
hvu-miR1439aw.2	1	167	STOWAWAY1_HV	1	166	DNA	d	0.8916	2	1127
hvu-miR1439aw.3	1	164	STOWAWAY1_HV	1	166	DNA	c	0.9091	2.3333	1203
hvu-miR1439aw.4	1	61	STOWAWAY1_HV	106	166	DNA	c	0.9672	2	519
hvu-miR1439aw.4	62	214	STOWAWAY1_HV	12	166	DNA	d	0.9026	3.5	1086
hvu-miR1439aw.5	1	163	STOWAWAY1_HV	1	166	DNA	c	0.8545	1.5714	1042
hvu-miR1439aw.6	1	164	STOWAWAY1_HV	1	166	DNA	d	0.8545	1.5333	1076
hvu-miR1439aw.7	1	163	STOWAWAY1_HV	1	166	DNA	c	0.8606	1.6154	1058
hvu-miR1439aw.8	1	159	STOWAWAY1_HV	1	166	DNA	d	0.8571	1.6154	1013
hvu-miR1439aw.9	1	169	STOWAWAY1_HV	1	166	DNA	d	0.8795	2	1095
hvu-miR1439ax.1	1	128	TREP216	1	127	DNA/Mariner	d	0.8203	1.375	754
hvu-miR1439ax.2	20	55	HADES_TA	62	97	DNA/Mariner	d	0.9167	3	271
hvu-miR1439ay.1	1	125	TREP216	1	127	DNA/Mariner	d	0.8413	1.6364	742
hvu-miR1439ay.2	1	97	HADES_TA	1	97	DNA/Mariner	d	0.8763	1.3333	679
hvu-miR1439ay.4	1	98	HADES_TA	1	97	DNA/Mariner	c	0.8283	1.7143	485
hvu-miR1439az	1	160	STOWAWAY1_HV	1	166	DNA	d	0.8827	1.8889	1093
hvu-miR1439b	1	164	STOWAWAY1_HV	1	166	DNA	c	0.8528	1.4615	950
hvu-miR1439c.1	1	164	STOWAWAY1_HV	1	166	DNA	d	0.8545	1.7692	1055
hvu-miR1439c.2	48	84	STOWAWAY27_SB	1	39	DNA	c	0.8421	1.25	230
hvu-miR1439d	1	97	HADES_TA	1	97	DNA/Mariner	c	0.8557	1.5556	628
hvu-miR1439e	1	97	HADES_TA	1	97	DNA/Mariner	c	0.8763	1.3333	678
hvu-miR1439f.1	3	99	HADES_TA	1	97	DNA/Mariner	c	0.8763	1.3333	677
hvu-miR1439f.2	1	97	HADES_TA	1	97	DNA/Mariner	c	0.8763	1.3333	677
hvu-miR1439g	1	69	HADES_TA	1	97	DNA/Mariner	d	0.8873	1.5	374
hvu-miR1439j	1	97	HADES_TA	1	97	DNA/Mariner	c	0.8454	1.25	633
hvu-miR1439k	1	98	HADES_TA	1	97	DNA/Mariner	d	0.79	1.3333	449
hvu-miR1439l	1	97	HADES_TA	1	97	DNA/Mariner	d	0.8247	1.4167	583
hvu-miR1439m	1	98	HADES_TA	1	97	DNA/Mariner	c	0.7475	1.6923	377
hvu-miR1439n	1	128	TREP216	1	127	DNA/Mariner	d	0.8281	1.9091	729
hvu-miR1439o	1	97	HADES_TA	1	97	DNA/Mariner	d	0.9072	1.2857	734
hvu-miR1439p	1	165	STOWAWAY1_HV	1	166	DNA	d	0.8795	1.6364	1131
hvu-miR1439q	1	166	STOWAWAY1_HV	1	166	DNA	d	0.8735	2.25	1045
hvu-miR1439r	1	98	HADES_TA	1	97	DNA/Mariner	d	0.78	1.3077	434
hvu-miR1439s	1	136	STOWAWAY1_HV	29	166	DNA	c	0.8188	1.4286	723
hvu-miR1439s	141	213	THALOS_AT	1	65	DNA/Mariner	c	0.8507	1.3333	372
hvu-miR1439t	1	162	STOWAWAY1_HV	1	166	DNA	d	0.8424	1.9167	967
hvu-miR1439u.1	1	98	HADES_TA	1	97	DNA/Mariner	c	0.85	1.6667	541
hvu-miR1439u.2	1	97	HADES_TA	1	97	DNA/Mariner	c	0.9278	1.4	763
hvu-miR1439v	1	96	HADES_TA	1	97	DNA/Mariner	c	0.7857	1.8889	417
hvu-miR1439w	1	164	STOWAWAY1_HV	1	166	DNA	c	0.8545	1.5333	1066
hvu-miR1439x.1	1	164	STOWAWAY1_HV	1	166	DNA	d	0.897	5.3333	1148
hvu-miR1439x.2	3	166	STOWAWAY1_HV	1	166	DNA	d	0.903	5	1157
hvu-miR1439y	1	155	STOWAWAY1_HV	1	166	DNA	d	0.8344	1.8462	887
hvu-miR1439z	1	97	HADES_TA	1	97	DNA/Mariner	d	0.9278	1.4	765
hvu-miR2673a	8	51	Gypsy-28_BRa-LTR	88	131	LTR/Gypsy	c	0.7727	1.6667	228
hvu-miR2673b	42	82	Helitron-N14_SBi	268	308	DNA/Helitron	d	0.8293	1.4	265
hvu-miR3979	35	66	LINE1-58_SBi	291	324	NonLTR/L1	d	0.9091	1	247
hvu-miR4227	50	138	Gypsy-10_ATr-LTR	794	874	LTR/Gypsy	d	0.7412	1.5455	246
hvu-miR437a	2	179	STOWAWAY41_OS	45	220	DNA	d	0.7598	1.7143	557
hvu-miR5049l	12	53	Gypsy-12_Ano-I	1611	1652	LTR/Gypsy	d	0.8095	2	222
hvu-miR5050b	28	86	Copia-63_MLP-I	2795	2851	LTR/Copia	c	0.7966	3	248
hvu-miR5067b	1	44	HADES_TA	14	57	DNA/Mariner	d	0.8182	2.6667	220
hvu-miR5067c	1	82	ICARUS_TM	13	94	DNA/Mariner	c	0.7439	1.75	338
hvu-miR5067e	23	61	Mariner-1_BDi	44	83	DNA/Mariner	c	0.825	1.2	226
hvu-miR5161a	11	84	ERV-2_LCh-I	6904	6974	ERV	c	0.7534	1.75	260
hvu-miR5161f.2	1	147	THALOS_AT	1	157	DNA/Mariner	c	0.8389	1.2353	871
hvu-miR5161g.2	1	107	ICARUS_TM	1	107	DNA/Mariner	c	0.757	1.7333	482
hvu-miR5161k	1	85	AsDRF1	1179	1264	DNA	c	0.7805	2.6	218
hvu-miR5161l	1	90	AsDRF1	1180	1264	DNA	c	0.7791	3.75	248
hvu-miR5161n	85	113	EnSpm-N2_TA	6558	6586	DNA/EnSpm/CACTA	c	0.8966	1	223
hvu-miR5161o	1	99	HADES_TA	1	97	DNA/Mariner	d	0.8	2	455
hvu-miR5161p	6	85	HADES_TA	1	91	DNA/Mariner	c	0.7683	1.8889	305
hvu-miR5161s	1	97	HADES_TA	1	97	DNA/Mariner	d	0.7474	1.8333	342
hvu-miR5161t	1	93	ICARUS_TM	1	107	DNA/Mariner	d	0.7835	1.8889	376
hvu-miR5161u	1	86	AsDRF1	1180	1264	DNA	c	0.7561	2.4286	218
hvu-miR5161v.2	1	97	HADES_TA	1	97	DNA/Mariner	d	0.8866	1.375	694
hvu-miR5161w.1	57	85	ATTIRTA1	1	29	DNA/Mariner	c	0.8966	1.5	222
hvu-miR5161w.2	24	65	Gypsy-12_Ano-I	1611	1652	LTR/Gypsy	d	0.8095	2	222
hvu-miR5169a	1	141	STOWAWAY41_OS	60	202	DNA	c	0.7394	1.5652	491
hvu-miR5169b	1	141	STOWAWAY41_OS	62	204	DNA	d	0.7394	1.5652	494
hvu-miR5171a	3	99	ICARUS_TM	8	104	DNA/Mariner	d	0.732	1.625	400
hvu-miR5171b	27	99	HADES_TA	4	77	DNA/Mariner	c	0.8429	2.6667	317
hvu-miR5175a	1	120	TREP216	6	124	DNA/Mariner	d	0.8583	1.4545	781
hvu-miR5175aa	1	100	HADES_TA	4	92	DNA/Mariner	c	0.8256	1.7143	369
hvu-miR5175ab	1	76	ICARUS_TM	6	80	DNA/Mariner	d	0.8026	1.8571	363
hvu-miR5175ac.1	1	150	STOWAWAY1_HV	4	161	DNA	c	0.8684	1.2857	984
hvu-miR5175ac.2	1	154	STOWAWAY1_HV	6	161	DNA	d	0.8581	1.6154	1014
hvu-miR5175ae.1	1	153	STOWAWAY1_HV	6	162	DNA	d	0.8397	1.5714	933
hvu-miR5175ae.2	1	156	THALOS_HV	4	159	DNA/Mariner	c	0.8397	1.3889	951
hvu-miR5175ae.3	1	153	STOWAWAY1_HV	6	162	DNA	d	0.8526	1.4286	983
hvu-miR5175af.1	1	154	STOWAWAY1_HV	4	161	DNA	c	0.8025	1.75	801
hvu-miR5175ag	1	120	TREP216	6	124	DNA/Mariner	d	0.8833	1.625	826
hvu-miR5175ah.1	1	158	STOWAWAY1_HV	6	162	DNA	d	0.8217	1.375	811
hvu-miR5175ah.2	1	160	STOWAWAY1_HV	6	162	DNA	d	0.8291	1.375	862
hvu-miR5175ai	1	89	HADES_TA	4	92	DNA/Mariner	c	0.9101	1.3333	675
hvu-miR5175aj	1	116	TREP216	6	124	DNA/Mariner	d	0.8205	1.4615	649
hvu-miR5175f	1	89	HADES_TA	4	92	DNA/Mariner	c	0.8427	1.5556	555
hvu-miR5175g	1	52	TREP216	6	57	DNA/Mariner	d	0.8462	1.3333	336
hvu-miR5175h	1	157	STOWAWAY1_HV	6	163	DNA	d	0.8734	1.6364	1058
hvu-miR5175i	1	155	STOWAWAY1_HV	4	161	DNA	c	0.879	2.4286	1028
hvu-miR5175k	1	96	STOWAWAY1_HV	6	113	DNA	d	0.8763	2	610
hvu-miR5175k	97	255	STOWAWAY1_HV	4	166	DNA	c	0.8457	1.6923	982
hvu-miR5175l	1	151	STOWAWAY1_HV	4	160	DNA	c	0.8516	2.1111	914
hvu-miR5175m	1	156	STOWAWAY1_HV	4	161	DNA	c	0.8354	1.7143	939
hvu-miR5175n	1	152	STOWAWAY1_HV	6	161	DNA	d	0.8452	1.9091	904
hvu-miR5175p	2	124	TREP216	7	124	DNA/Mariner	d	0.8417	1.5455	704
hvu-miR5175r	1	156	STOWAWAY1_HV	4	161	DNA	c	0.8471	1.5333	993
hvu-miR5175t.1	1	99	HADES_TA	4	92	DNA/Mariner	c	0.8778	1.25	583
hvu-miR5175t.2	2	89	HADES_TA	4	91	DNA/Mariner	c	0.8977	1.125	658
hvu-miR5175t.3	1	89	HADES_TA	4	92	DNA/Mariner	c	0.8989	1.2857	660
hvu-miR5175u.1	1	120	TREP216	4	122	DNA/Mariner	c	0.8667	1.25	814
hvu-miR5175u.2	1	117	TREP216	6	124	DNA/Mariner	d	0.8305	1.6364	669
hvu-miR5175u.3	1	120	TREP216	6	124	DNA/Mariner	d	0.85	1.2143	784
hvu-miR5175u.4	1	120	TREP216	4	122	DNA/Mariner	c	0.875	1.5556	811
hvu-miR5175u.5	1	120	TREP216	6	124	DNA/Mariner	d	0.875	1.4	820
hvu-miR5175v.1	19	60	Gypsy-12_Ano-I	1611	1652	LTR/Gypsy	d	0.8095	2	222
hvu-miR5175w.1	1	155	STOWAWAY1_HV	4	161	DNA	c	0.8013	1.6875	773
hvu-miR5175w.10	29	97	THALOS_HV	93	161	DNA/Mariner	d	0.9275	1.6667	534
hvu-miR5175w.11	1	156	STOWAWAY1_HV	4	161	DNA	c	0.8344	1.4706	965
hvu-miR5175w.12	1	156	STOWAWAY1_HV	6	163	DNA	d	0.8471	1.5333	1003
hvu-miR5175w.13	1	155	STOWAWAY1_HV	4	161	DNA	c	0.8535	1.6154	985
hvu-miR5175w.14	1	155	THALOS_HV	6	161	DNA/Mariner	d	0.8782	1.5	1031
hvu-miR5175w.15	1	151	STOWAWAY1_HV	6	163	DNA	d	0.8497	1.6154	940
hvu-miR5175w.16	1	156	STOWAWAY1_HV	4	161	DNA	c	0.8662	1.8182	1028
hvu-miR5175w.17	21	54	EnSpm-N1_HV	5767	5800	DNA/EnSpm/CACTA	d	0.9118	1.5	258
hvu-miR5175w.18	1	156	STOWAWAY1_HV	6	163	DNA	d	0.879	1.5	1096
hvu-miR5175w.19	1	159	STOWAWAY1_HV	6	163	DNA	d	0.8861	2	1054
hvu-miR5175w.2	1	156	STOWAWAY1_HV	6	163	DNA	d	0.8471	1.7692	982
hvu-miR5175w.20	1	154	STOWAWAY1_HV	4	161	DNA	c	0.8726	1.7	1012
hvu-miR5175w.21	1	156	STOWAWAY1_HV	6	163	DNA	d	0.8854	2.125	1081
hvu-miR5175w.22	1	156	STOWAWAY1_HV	4	161	DNA	c	0.9045	2.3333	1130
hvu-miR5175w.23	1	155	STOWAWAY1_HV	6	163	DNA	d	0.8535	2.1	969
hvu-miR5175w.24	1	131	STOWAWAY1_HV	29	161	DNA	c	0.8195	1.4615	692
hvu-miR5175w.24	136	205	THALOS_AT	4	65	DNA/Mariner	c	0.8438	1.3333	345
hvu-miR5175w.25	1	156	THALOS_HV	4	159	DNA/Mariner	c	0.8718	1.4286	1034
hvu-miR5175w.26	1	144	STOWAWAY1_HV	6	163	DNA	d	0.8904	2	966
hvu-miR5175w.27	1	56	STOWAWAY1_HV	106	161	DNA	c	0.9643	2	473
hvu-miR5175w.27	57	206	STOWAWAY1_HV	12	163	DNA	d	0.9007	3.5	1059
hvu-miR5175w.28	1	155	THALOS_HV	6	161	DNA/Mariner	d	0.8526	1.375	965
hvu-miR5175w.29	1	157	STOWAWAY1_HV	6	163	DNA	d	0.8987	2	1117
hvu-miR5175w.3	1	156	STOWAWAY1_HV	6	163	DNA	d	0.8726	1.5833	1070
hvu-miR5175w.30	1	156	STOWAWAY1_HV	6	163	DNA	d	0.879	1.6364	1086
hvu-miR5175w.31	2	156	STOWAWAY1_HV	4	160	DNA	c	0.859	1.75	1001
hvu-miR5175w.4	1	154	STOWAWAY1_HV	4	160	DNA	c	0.8654	2.1111	985
hvu-miR5175w.5	1	156	THALOS_HV	4	159	DNA/Mariner	c	0.8654	1.5	1009
hvu-miR5175w.6	1	160	STOWAWAY1_HV	6	163	DNA	d	0.8734	1.5455	1028
hvu-miR5175w.7	1	154	STOWAWAY1_HV	6	163	DNA	d	0.8599	1.9	976
hvu-miR5175w.8	1	156	THALOS_HV	6	161	DNA/Mariner	d	0.8462	1.6	946
hvu-miR5175w.9	1	156	STOWAWAY1_HV	6	163	DNA	d	0.8981	2.5	1111
hvu-miR5175x.1	1	155	STOWAWAY1_HV	6	163	DNA	d	0.8544	1.5833	957
hvu-miR5175x.2	1	155	STOWAWAY1_HV	6	163	DNA	d	0.8481	1.5385	942
hvu-miR5175x.3	1	155	STOWAWAY1_HV	6	163	DNA	d	0.8481	1.6667	948
hvu-miR5180a	13	86	HADES_TA	7	80	DNA/Mariner	d	0.8243	2.1667	406
hvu-miR5180b	1	61	HADES_TA	18	78	DNA/Mariner	c	0.9344	1.3333	470
hvu-miR5181b	1	95	ICARUS_TM	8	102	DNA/Mariner	d	0.7021	1.8571	266
hvu-miR5181c	1	86	HADES_TA	6	90	DNA/Mariner	c	0.8295	1.6667	427
hvu-miR5181d	1	86	HADES_TA	8	92	DNA/Mariner	d	0.8161	1.625	439
hvu-miR5181e	7	85	HADES_TA	6	84	DNA/Mariner	c	0.7532	2.125	257
hvu-miR5181f	1	47	HADES_TA	8	53	DNA/Mariner	d	0.8511	2	227
hvu-miR5181f	53	137	ATHOS_TM	1	85	DNA/Mariner	c	0.8824	1.4286	579
hvu-miR5181f	140	169	HADES_TA	6	35	DNA/Mariner	c	0.9	1.5	226
hvu-miR5181g	1	85	HADES_TA	8	92	DNA/Mariner	d	0.9176	1.75	640
hvu-miR5181h	1	74	HADES_TA	6	90	DNA/Mariner	c	0.75	1.8889	248
hvu-miR5181i	1	86	HADES_TA	6	90	DNA/Mariner	c	0.8182	1.8333	403
hvu-miR5181j	1	85	HADES_TA	6	90	DNA/Mariner	c	0.9176	1.4	649
hvu-miR5181k.1	1	87	HADES_TA	8	92	DNA/Mariner	d	0.7727	2	341
hvu-miR5181k.2	1	86	HADES_TA	8	92	DNA/Mariner	d	0.8161	2.6	410
hvu-miR5181l	7	85	HADES_TA	14	92	DNA/Mariner	d	0.7403	1.8	248
hvu-miR5181m.1	1	85	HADES_TA	6	90	DNA/Mariner	c	0.8706	1.375	579
hvu-miR5181m.2	1	84	HADES_TA	7	90	DNA/Mariner	c	0.8571	1.3333	552
hvu-miR5181n	1	76	HADES_TA	8	92	DNA/Mariner	d	0.859	2.3333	389
hvu-miR5181o	1	84	HADES_TA	8	91	DNA/Mariner	d	0.9167	1.1667	649
hvu-miR5181p	1	86	HADES_TA	6	90	DNA/Mariner	c	0.7816	2.2857	361
hvu-miR5181q	1	86	HADES_TA	8	92	DNA/Mariner	d	0.8295	1.6667	428
hvu-miR5203b.2	1	89	HADES_TA	6	94	DNA/Mariner	d	0.9213	1.75	681
hvu-miR5203b.3	1	90	HADES_TA	6	94	DNA/Mariner	d	0.837	1.6667	469
hvu-miR5203c	19	67	STOWAWAY1_HV	4	52	DNA	c	0.898	5	333
hvu-miR5203d	9	87	HADES_TA	6	84	DNA/Mariner	c	0.7532	2.125	257
hvu-miR5203e	1	52	HADES_TA	6	57	DNA/Mariner	d	0.7885	2.2	247
hvu-miR5203f.1	1	89	HADES_TA	4	92	DNA/Mariner	c	0.8427	1.75	545
hvu-miR5203f.2	1	89	HADES_TA	4	92	DNA/Mariner	c	0.9213	1.4	690
hvu-miR5203g	1	99	ICARUS_TM	4	102	DNA/Mariner	c	0.7576	1.8462	442
hvu-miR5203h	12	77	AsDRF1	1196	1261	DNA	d	0.7692	2.6	201
hvu-miR5205a.1	1	91	HADES_TA	3	93	DNA/Mariner	c	0.8681	1.7143	607
hvu-miR5205a.2	2	91	HADES_TA	6	95	DNA/Mariner	d	0.8667	1.3333	619
hvu-miR5205a.3	1	91	HADES_TA	3	93	DNA/Mariner	c	0.8462	1.75	567
hvu-miR5205a.4	1	90	HADES_TA	3	93	DNA/Mariner	c	0.9121	1.4	676
hvu-miR5205a.5	1	91	HADES_TA	5	95	DNA/Mariner	d	0.8681	1.3333	628
hvu-miR5205a.6	1	91	HADES_TA	5	95	DNA/Mariner	d	0.8462	1.4	587
hvu-miR5205a.7	1	91	HADES_TA	5	95	DNA/Mariner	d	0.8791	1.8333	623
hvu-miR5205a.8	1	91	HADES_TA	3	93	DNA/Mariner	c	0.9341	1.5	727
hvu-miR5205a.9	1	91	HADES_TA	3	93	DNA/Mariner	c	0.9231	1.4	712
hvu-miR5205aa	1	159	STOWAWAY1_HV	2	163	DNA	c	0.8272	2.1818	862
hvu-miR5205ab.1	1	160	THALOS_HV	2	161	DNA/Mariner	c	0.9	1.1429	1170
hvu-miR5205ab.2	1	160	THALOS_HV	2	161	DNA/Mariner	c	0.9062	1.3636	1168
hvu-miR5205ab.3	1	160	THALOS_HV	2	161	DNA/Mariner	c	0.8938	1.2143	1147
hvu-miR5205ab.5	1	159	THALOS_HV	2	161	DNA/Mariner	c	0.8438	1.0435	1024
hvu-miR5205ac	1	155	STOWAWAY1_HV	4	165	DNA	d	0.8354	1.6429	919
hvu-miR5205ad.1	1	102	HADES_TA	5	95	DNA/Mariner	d	0.8602	2.5	498
hvu-miR5205ad.10	1	91	HADES_TA	3	93	DNA/Mariner	c	0.9121	1.1429	707
hvu-miR5205ad.11	1	91	HADES_TA	3	93	DNA/Mariner	c	0.9011	1.2857	683
hvu-miR5205ad.2	1	91	HADES_TA	5	95	DNA/Mariner	d	0.9231	1.75	703
hvu-miR5205ad.3	1	90	HADES_TA	3	93	DNA/Mariner	c	0.8736	3	502
hvu-miR5205ad.5	2	92	HADES_TA	6	95	DNA/Mariner	d	0.7935	2	415
hvu-miR5205ad.6	1	90	HADES_TA	5	95	DNA/Mariner	d	0.9011	1.1429	672
hvu-miR5205ad.7	1	92	HADES_TA	3	93	DNA/Mariner	c	0.828	1.8333	449
hvu-miR5205ad.8	1	92	HADES_TA	3	93	DNA/Mariner	c	0.8404	1.6667	490
hvu-miR5205ae	1	122	TREP216	5	125	DNA/Mariner	d	0.8115	1.375	703
hvu-miR5205af	1	160	STOWAWAY1_HV	2	163	DNA	c	0.8758	1.4615	1112
hvu-miR5205ag.1	1	162	STOWAWAY1_HV	4	165	DNA	d	0.8148	1.5	967
hvu-miR5205ag.3	1	157	STOWAWAY1_HV	4	165	DNA	d	0.8012	1.4	849
hvu-miR5205ag.4	1	160	STOWAWAY1_HV	4	165	DNA	d	0.882	2.25	1098
hvu-miR5205ag.5	1	122	STOWAWAY1_HV	2	163	DNA	c	0.8862	1.4444	694
hvu-miR5205ah	1	158	STOWAWAY1_HV	2	163	DNA	c	0.8025	1.4211	836
hvu-miR5205ai	1	157	STOWAWAY1_HV	2	163	DNA	c	0.8571	1.5833	984
hvu-miR5205aj.1	1	160	STOWAWAY1_HV	4	165	DNA	d	0.882	2.5714	1084
hvu-miR5205aj.2	1	159	STOWAWAY1_HV	4	165	DNA	d	0.8385	1.6	977
hvu-miR5205aj.3	1	160	THALOS_HV	2	161	DNA/Mariner	c	0.85	1.2632	1022
hvu-miR5205ak.1	1	143	THALOS_AT	2	154	DNA/Mariner	c	0.8345	1.2353	836
hvu-miR5205ak.2	1	158	STOWAWAY1_HV	4	165	DNA	d	0.8812	1.7	1092
hvu-miR5205al.1	1	122	TREP216	3	123	DNA/Mariner	c	0.877	1.5556	833
hvu-miR5205al.2	1	122	TREP216	5	125	DNA/Mariner	d	0.877	1.4	842
hvu-miR5205am	1	90	HADES_TA	5	94	DNA/Mariner	d	0.9111	1.1429	696
hvu-miR5205an	41	70	TREP220	3	32	DNA	c	0.9333	2	242
hvu-miR5205b	1	57	THALOS_AT	98	154	DNA/Mariner	c	0.7719	1.8571	267
hvu-miR5205b	63	105	STOWAWAY1_HV	2	44	DNA	c	0.9302	3	324
hvu-miR5205c	1	92	HADES_TA	3	93	DNA/Mariner	c	0.828	2.1667	485
hvu-miR5205d	43	79	STOWAWAY34_OS	1	40	DNA	c	0.8684	1.3333	233
hvu-miR5205f	1	158	STOWAWAY1_HV	4	165	DNA	d	0.8385	1.9167	934
hvu-miR5205g	1	160	STOWAWAY1_HV	4	165	DNA	d	0.8882	1.8889	1130
hvu-miR5205h	1	159	STOWAWAY1_HV	4	165	DNA	d	0.8457	1.5	965
hvu-miR5205i	1	79	HADES_TA	5	95	DNA/Mariner	d	0.8519	1.4286	455
hvu-miR5205j	1	160	STOWAWAY1_HV	2	163	DNA	c	0.8509	1.5333	1031
hvu-miR5205k	1	161	STOWAWAY1_HV	4	165	DNA	d	0.8282	1.8462	898
hvu-miR5205l	1	160	STOWAWAY1_HV	2	163	DNA	c	0.8758	1.4615	1109
hvu-miR5205m	1	149	STOWAWAY1_HV	4	163	DNA	d	0.8344	1.7692	858
hvu-miR5205o	1	91	HADES_TA	3	93	DNA/Mariner	c	0.9121	1.3333	697
hvu-miR5205p	2	111	ICARUS_TM	3	102	DNA/Mariner	c	0.7921	1.3333	508
hvu-miR5205q	1	91	HADES_TA	3	93	DNA/Mariner	c	0.8462	1.5556	577
hvu-miR5205r	1	160	STOWAWAY1_HV	4	165	DNA	d	0.8944	2	1137
hvu-miR5205s	1	208	STOWAWAY1_HV	4	165	DNA	d	0.8415	1.8462	818
hvu-miR5205t	1	160	STOWAWAY1_HV	4	165	DNA	d	0.8758	1.9	1087
hvu-miR5205u	1	160	THALOS_HV	2	161	DNA/Mariner	c	0.875	1.5385	1063
hvu-miR5205v	1	160	STOWAWAY1_HV	4	165	DNA	d	0.8758	2.375	1070
hvu-miR5205w.1	1	157	STOWAWAY1_HV	4	165	DNA	d	0.8625	1.5	1002
hvu-miR5205w.2	1	38	STOWAWAY1_HV	127	163	DNA	c	0.9474	1	289
hvu-miR5205x	1	159	STOWAWAY1_HV	4	164	DNA	d	0.875	1.5833	1100
hvu-miR5205y	1	158	STOWAWAY1_HV	4	165	DNA	d	0.8261	1.7857	902
hvu-miR5205z	1	158	STOWAWAY1_HV	4	165	DNA	d	0.8323	1.6	942
hvu-miR520ai	1	154	STOWAWAY1_HV	2	163	DNA	c	0.8718	1.2857	1022
hvu-miR5281a.1	1	157	STOWAWAY1_HV	3	162	DNA	c	0.8038	1.6875	795
hvu-miR5281a.10	1	158	STOWAWAY1_HV	3	162	DNA	c	0.8679	1.8182	1050
hvu-miR5281a.11	22	56	EnSpm-N1_HV	5767	5801	DNA/EnSpm/CACTA	d	0.9143	1.5	267
hvu-miR5281a.12	1	158	STOWAWAY1_HV	5	164	DNA	d	0.8805	1.5	1118
hvu-miR5281a.13	1	158	STOWAWAY1_HV	3	162	DNA	c	0.8553	1.6923	1019
hvu-miR5281a.14	1	161	STOWAWAY1_HV	5	164	DNA	d	0.8875	2	1076
hvu-miR5281a.15	1	158	STOWAWAY1_HV	5	164	DNA	d	0.8868	2.125	1103
hvu-miR5281a.16	1	158	STOWAWAY1_HV	3	162	DNA	c	0.9057	2.3333	1152
hvu-miR5281a.17	1	157	STOWAWAY1_HV	5	164	DNA	d	0.8553	2.1	991
hvu-miR5281a.18	2	157	THALOS_HV	6	162	DNA/Mariner	d	0.879	1.5	1042
hvu-miR5281a.19	1	158	THALOS_HV	5	162	DNA/Mariner	d	0.8671	1.5	1031
hvu-miR5281a.2	1	158	STOWAWAY1_HV	5	164	DNA	d	0.8491	1.7692	1004
hvu-miR5281a.20	1	158	THALOS_HV	3	160	DNA/Mariner	c	0.8734	1.4286	1056
hvu-miR5281a.21	1	146	STOWAWAY1_HV	5	164	DNA	d	0.8919	2	988
hvu-miR5281a.22	1	157	THALOS_HV	5	162	DNA/Mariner	d	0.8544	1.375	987
hvu-miR5281a.23	1	159	STOWAWAY1_HV	5	164	DNA	d	0.9	2	1139
hvu-miR5281a.24	1	156	STOWAWAY1_HV	3	162	DNA	c	0.8742	1.7	1034
hvu-miR5281a.25	1	57	STOWAWAY1_HV	106	162	DNA	c	0.9649	2	484
hvu-miR5281a.25	58	208	STOWAWAY1_HV	12	164	DNA	d	0.9013	3.5	1070
hvu-miR5281a.26	1	158	STOWAWAY1_HV	5	164	DNA	d	0.8805	1.6364	1108
hvu-miR5281a.3	1	158	THALOS_HV	3	160	DNA/Mariner	c	0.8671	1.5	1031
hvu-miR5281a.4	1	158	THALOS_HV	5	162	DNA/Mariner	d	0.8481	1.6	968
hvu-miR5281a.5	2	156	STOWAWAY1_HV	6	164	DNA	d	0.8608	1.9	987
hvu-miR5281a.6	1	157	STOWAWAY1_HV	3	162	DNA	c	0.8491	1.5714	991
hvu-miR5281a.7	30	99	THALOS_HV	93	162	DNA/Mariner	d	0.9286	1.6667	545
hvu-miR5281a.8	2	158	STOWAWAY1_HV	3	161	DNA	c	0.8354	1.4706	976
hvu-miR5281a.9	1	158	STOWAWAY1_HV	5	164	DNA	d	0.8994	2.5	1133
hvu-miR5281b.1	1	158	STOWAWAY1_HV	5	164	DNA	d	0.8742	1.5833	1092
hvu-miR5281b.2	1	156	STOWAWAY1_HV	3	161	DNA	c	0.8671	2.1111	1007
hvu-miR5281b.3	2	132	STOWAWAY1_HV	29	161	DNA	c	0.8195	1.4615	692
hvu-miR5281b.3	137	207	THALOS_AT	3	65	DNA/Mariner	c	0.8462	1.3333	356
hvu-miR5281c	1	156	STOWAWAY1_HV	5	164	DNA	d	0.8428	2.2	926
hvu-miR5281d	1	158	STOWAWAY1_HV	5	164	DNA	d	0.8491	1.5333	1025
tae-miR1058	1	100	STOWAWAY1_HV	33	136	DNA	d	0.8252	1.5	584
tae-miR1117b	1	80	EnSpm-N3_TA	1094	1173	DNA/EnSpm/CACTA	c	0.9375	5	650
tae-miR1117c	1	58	EnSpm2_TM	225	282	DNA/EnSpm/CACTA	d	0.7759	2.6	277
tae-miR1117d	3	88	EnSpm2_TM	159	244	DNA/EnSpm/CACTA	d	0.8605	2	549
tae-miR1117e	3	88	EnSpm2_TM	159	244	DNA/EnSpm/CACTA	d	0.8605	4	511
tae-miR1117f	1	76	EnSpm2_TM	214	289	DNA/EnSpm/CACTA	c	0.8421	1.7143	496
tae-miR1120aa	9	61	AsDRF1	1196	1248	DNA	c	0.8077	2	203
tae-miR1120ad	9	61	AsDRF1	1196	1248	DNA	d	0.9	99	241
tae-miR1120ae	9	61	AsDRF1	1196	1248	DNA	c	0.8077	1.6	210
tae-miR1120ah	9	60	AsDRF1	1196	1248	DNA	c	0.8462	1.6667	229
tae-miR1120ai	10	60	AsDRF1	1197	1248	DNA	d	0.7692	1.8333	202
tae-miR1120aj	10	62	ATHOS_TM	17	69	DNA/Mariner	d	0.8333	3	230
tae-miR1120aq	9	61	AsDRF1	1196	1248	DNA	d	0.7925	1.8333	242
tae-miR1120d	7	72	ATHOS_HV	15	79	DNA/Mariner	d	0.7761	2.2	215
tae-miR1120n	14	71	STOWAWAY8_OS	203	255	DNA	d	0.8182	1.75	230
tae-miR1120o	9	71	AsDRF1	1196	1258	DNA	d	0.8065	3.3333	239
tae-miR1120t	9	61	AsDRF1	1196	1248	DNA	d	0.8462	2	239
tae-miR1121b	22	78	ATHOS_TM	8	64	DNA/Mariner	d	0.8772	3.5	355
tae-miR1122a.2	1	53	TREP216	37	89	DNA/Mariner	c	0.8113	1.25	302
tae-miR1122a.3	1	53	TREP216	37	89	DNA/Mariner	c	0.8113	1.4286	294
tae-miR1122d	1	53	TREP216	39	91	DNA/Mariner	d	0.8679	1.1667	354
tae-miR1122e	1	53	TREP216	37	89	DNA/Mariner	c	0.8491	1.1429	342
tae-miR1122f	1	53	ICARUS_TM	29	81	DNA/Mariner	d	0.9434	1.5	426
tae-miR1122g	1	53	TREP216	39	91	DNA/Mariner	d	0.7547	1.625	228
tae-miR1122h	1	53	TREP216	37	89	DNA/Mariner	c	0.8679	1.4	347
tae-miR1122i	1	49	TREP216	43	91	DNA/Mariner	c	0.898	1.25	352
tae-miR1122j	1	51	TREP216	39	89	DNA/Mariner	d	0.8824	1.2	353
tae-miR1122k	1	53	TREP216	39	91	DNA/Mariner	d	0.8302	1.125	326
tae-miR1122l	8	50	Mariner-1_BDi	40	83	DNA/Mariner	c	0.8636	1.6667	263
tae-miR1122n	4	53	TREP216	42	91	DNA/Mariner	d	0.86	1.1667	332
tae-miR1122o	1	53	TREP216	37	89	DNA/Mariner	c	0.7925	1.5714	269
tae-miR1122p	1	53	TREP216	39	91	DNA/Mariner	d	0.8113	1.4286	291
tae-miR1122r	1	52	ICARUS_TM	28	79	DNA/Mariner	c	0.9423	1.5	418
tae-miR1126b	7	85	THALOS_AT	39	113	DNA/Mariner	c	0.8947	1.5	489
tae-miR1126c	1	88	THALOS_AT	39	121	DNA/Mariner	d	0.881	1	572
tae-miR1126d	1	86	THALOS_AT	37	119	DNA/Mariner	c	0.8333	2.2	409
tae-miR1126e	1	89	THALOS_AT	39	121	DNA/Mariner	d	0.8588	1	501
tae-miR1127aa	3	113	ICARUS_TM	2	102	DNA/Mariner	c	0.7941	1.4286	478
tae-miR1127aab	1	123	ICARUS_TM	4	106	DNA/Mariner	d	0.7905	1.4286	428
tae-miR1127aad	33	91	Helitron-N28B_OS	2643	2699	DNA/Helitron	d	0.7966	1.2857	267
tae-miR1127aag	4	116	ICARUS_TM	1	102	DNA/Mariner	d	0.7981	1.2667	487
tae-miR1127aai	4	88	AsDRF1	1180	1264	DNA	c	0.7738	2.8333	312
tae-miR1127aaj	6	103	ICARUS_TM	2	99	DNA/Mariner	c	0.8061	1.3571	582
tae-miR1127aak.1	1	103	ICARUS_TM	2	104	DNA/Mariner	c	0.8252	1.2857	637
tae-miR1127aak.2	1	111	ICARUS_TM	4	106	DNA/Mariner	d	0.8173	1.2857	547
tae-miR1127aal	2	124	TREP216	3	123	DNA/Mariner	c	0.7951	1.7692	604
tae-miR1127aam	4	120	ICARUS_TM	1	107	DNA/Mariner	c	0.8333	1.7	558
tae-miR1127aan	4	119	ICARUS_TM	1	107	DNA/Mariner	c	0.7685	1.8462	420
tae-miR1127aao.1	3	113	ICARUS_TM	2	102	DNA/Mariner	c	0.835	1.3636	544
tae-miR1127aao.2	1	102	ICARUS_TM	4	106	DNA/Mariner	d	0.7692	1.9091	399
tae-miR1127aar	4	89	HADES_TA	1	97	DNA/Mariner	c	0.8295	1.0833	494
tae-miR1127aas.1	4	117	ICARUS_TM	1	107	DNA/Mariner	c	0.8318	1.5	560
tae-miR1127aat	4	81	HADES_TA	1	97	DNA/Mariner	d	0.8537	1.1429	385
tae-miR1127aau	4	85	HADES_TA	1	97	DNA/Mariner	c	0.8706	2	438
tae-miR1127aaw	3	103	ICARUS_TM	2	102	DNA/Mariner	c	0.8416	1.3333	615
tae-miR1127aax	1	103	ICARUS_TM	2	104	DNA/Mariner	c	0.8252	1.125	655
tae-miR1127aay.1	1	103	ICARUS_TM	4	106	DNA/Mariner	d	0.8544	1.25	655
tae-miR1127aaz.1	4	89	TREP220	1	109	DNA	c	0.8022	2.1667	349
tae-miR1127aaz.3	3	35	Helitron-N28B_OS	2668	2700	DNA/Helitron	c	0.9091	3	243
tae-miR1127aaz.3	43	74	Helitron-N28B_OS	2668	2699	DNA/Helitron	d	0.9062	3	232
tae-miR1127ab	4	120	ICARUS_TM	1	107	DNA/Mariner	c	0.8349	1.3333	580
tae-miR1127aba	4	88	TREP220	1	109	DNA	d	0.8315	2.5	352
tae-miR1127abb	4	110	DNA-TA-1_TM	2	108	DNA	c	0.785	1.5333	557
tae-miR1127abc	4	80	HADES_TA	1	97	DNA/Mariner	c	0.8205	1.4444	347
tae-miR1127abd	4	88	AsDRF1	1180	1264	DNA	c	0.7529	3.8	265
tae-miR1127abg	4	33	Mariner-N2_ALy	215	244	DNA/Mariner	c	0.9	1.5	222
tae-miR1127abg	52	81	Mariner-N2_ALy	215	244	DNA/Mariner	d	0.9	1.5	221
tae-miR1127abh	4	88	AsDRF1	1180	1264	DNA	c	0.8049	6.5	316
tae-miR1127abi	1	103	ICARUS_TM	2	104	DNA/Mariner	c	0.7835	2	368
tae-miR1127abk	3	88	AsDRF1	1179	1264	DNA	d	0.7857	2.8	303
tae-miR1127abl	1	27	EnSpm-N2_TA	6555	6581	DNA/EnSpm/CACTA	d	1	99	254
tae-miR1127abo.1	1	92	ICARUS_TM	2	104	DNA/Mariner	c	0.8936	1	632
tae-miR1127abo.3	3	103	ICARUS_TM	2	102	DNA/Mariner	c	0.9109	1.8	719
tae-miR1127abo.4	3	104	ICARUS_TM	2	102	DNA/Mariner	c	0.9412	1.25	779
tae-miR1127abq	4	92	TREP220	1	109	DNA	c	0.7912	1.5	348
tae-miR1127abt	1	103	ICARUS_TM	2	104	DNA/Mariner	c	0.835	1.2143	661
tae-miR1127abu	1	103	ICARUS_TM	4	106	DNA/Mariner	d	0.8447	1.4545	658
tae-miR1127abw	4	88	TREP220	1	109	DNA	c	0.7907	1.3636	332
tae-miR1127abx	4	87	AsDRF1	1180	1264	DNA	d	0.7738	2.6667	313
tae-miR1127aby	5	35	Helitron-N28B_OS	2668	2698	DNA/Helitron	c	0.9032	3	224
tae-miR1127aby	43	74	DNA9-N5C_OS	423	454	DNA	d	0.875	1.3333	222
tae-miR1127abz	7	104	ICARUS_TM	10	106	DNA/Mariner	d	0.8367	1.25	605
tae-miR1127ac.1	1	101	ICARUS_TM	2	104	DNA/Mariner	c	0.8431	1.3636	632
tae-miR1127ac.2	1	103	ICARUS_TM	4	106	DNA/Mariner	d	0.8738	1.3	689
tae-miR1127acb	2	103	ICARUS_TM	3	102	DNA/Mariner	c	0.8725	1.375	637
tae-miR1127acc	3	103	ICARUS_TM	2	102	DNA/Mariner	c	0.8614	1.5556	635
tae-miR1127acd	1	103	ICARUS_TM	4	106	DNA/Mariner	d	0.835	1.3077	615
tae-miR1127ace	39	66	STOWAWAY30-3_OS	73	100	DNA	d	0.9286	1	230
tae-miR1127acf.2	4	56	ICARUS_TM	55	107	DNA/Mariner	c	0.7736	2	224
tae-miR1127acf.2	64	143	ICARUS_TM	1	91	DNA/Mariner	c	0.7848	2.3333	237
tae-miR1127acl	4	88	AsDRF1	1180	1264	DNA	d	0.7647	2.8571	356
tae-miR1127acn	4	88	AsDRF1	1180	1264	DNA	d	0.7805	5	277
tae-miR1127aco	3	101	ICARUS_TM	6	102	DNA/Mariner	d	0.7273	1.3889	355
tae-miR1127acp	4	87	AsDRF1	1180	1264	DNA	c	0.7857	3	327
tae-miR1127acq	4	121	Mariner-1_BDi	1	128	DNA/Mariner	d	0.7934	2.125	380
tae-miR1127acs.1	4	35	Helitron-N28B_OS	2668	2699	DNA/Helitron	c	0.875	2	217
tae-miR1127act	4	89	HADES_TA	1	97	DNA/Mariner	c	0.7586	1.6667	346
tae-miR1127ad	4	110	ICARUS_TM	1	107	DNA/Mariner	c	0.8785	1.3	723
tae-miR1127adb	2	103	ICARUS_TM	5	105	DNA/Mariner	d	0.7941	1.4286	505
tae-miR1127ae.1	4	31	TREP220	82	109	DNA	c	1	99	264
tae-miR1127ae.2	4	88	AsDRF1	1180	1264	DNA	d	0.8049	6.5	316
tae-miR1127ae.4	4	87	AsDRF1	1180	1264	DNA	d	0.7857	3	327
tae-miR1127af.1	4	120	ICARUS_TM	1	107	DNA/Mariner	c	0.8704	1.625	640
tae-miR1127ag	4	88	TREP220	1	109	DNA	d	0.8444	2	393
tae-miR1127ah.2	1	113	ICARUS_TM	2	104	DNA/Mariner	c	0.8654	1.625	645
tae-miR1127ai	1	32	EnSpm-N2_TA	6555	6586	DNA/EnSpm/CACTA	d	0.875	1	237
tae-miR1127ak	4	97	HADES_TA	1	97	DNA/Mariner	d	0.8542	1.5714	553
tae-miR1127am	50	105	TREP216	1	56	DNA/Mariner	c	0.7857	6	235
tae-miR1127ao	2	89	AsDRF1	1178	1265	DNA	d	0.7727	2.8333	330
tae-miR1127ap	1	93	AsDRF1	1177	1269	DNA	d	0.7609	5	308
tae-miR1127ar.1	1	123	TREP216	4	126	DNA/Mariner	d	0.7805	1.5625	589
tae-miR1127ar.10	1	102	ICARUS_TM	4	106	DNA/Mariner	d	0.8835	1.5714	664
tae-miR1127ar.2	1	103	ICARUS_TM	4	106	DNA/Mariner	d	0.9029	1.25	779
tae-miR1127ar.3	1	103	ICARUS_TM	4	106	DNA/Mariner	d	0.9029	1.1111	751
tae-miR1127ar.6	1	103	ICARUS_TM	4	106	DNA/Mariner	d	0.8932	1.375	714
tae-miR1127ar.7	1	104	ICARUS_TM	4	106	DNA/Mariner	d	0.8942	1.4286	700
tae-miR1127ar.8	1	103	ICARUS_TM	4	106	DNA/Mariner	d	0.9029	1.4286	728
tae-miR1127at	3	103	ICARUS_TM	2	102	DNA/Mariner	c	0.8529	1.3	608
tae-miR1127au	1	103	ICARUS_TM	4	106	DNA/Mariner	d	0.8932	1.375	717
tae-miR1127aw.1	4	130	ICARUS_TM	1	107	DNA/Mariner	d	0.7982	1.4286	462
tae-miR1127ay.1	4	110	ICARUS_TM	1	107	DNA/Mariner	c	0.8505	1.4545	660
tae-miR1127az	1	102	ICARUS_TM	2	104	DNA/Mariner	c	0.8641	1.4444	727
tae-miR1127c.1	4	35	Helitron-N28B_OS	2668	2699	DNA/Helitron	c	0.9375	99	245
tae-miR1127c.1	61	86	TREP220	1	26	DNA	c	0.9231	1	214
tae-miR1127c.2	4	32	STOWAWAY48_OS	1	29	DNA	d	0.931	1	235
tae-miR1127d.1	4	130	ICARUS_TM	1	107	DNA/Mariner	d	0.8182	1.8889	467
tae-miR1127e.1	1	123	ICARUS_TM	4	106	DNA/Mariner	d	0.8113	1.8889	433
tae-miR1127f	1	116	ICARUS_TM	2	104	DNA/Mariner	c	0.8	1.3846	488
tae-miR1127g	4	89	TREP220	1	109	DNA	c	0.7889	1.3636	319
tae-miR1127h.1	4	120	ICARUS_TM	1	107	DNA/Mariner	c	0.8241	1.3846	566
tae-miR1127h.2	4	110	ICARUS_TM	1	107	DNA/Mariner	d	0.8318	1.2857	635
tae-miR1127i	4	120	ICARUS_TM	1	107	DNA/Mariner	d	0.789	1.5	477
tae-miR1127j	4	120	TREP216	1	127	DNA/Mariner	d	0.7667	3	442
tae-miR1127k.1	1	113	ICARUS_TM	2	104	DNA/Mariner	c	0.8173	1.3846	562
tae-miR1127k.11	1	103	ICARUS_TM	2	104	DNA/Mariner	c	0.835	1.5455	632
tae-miR1127k.12	1	113	ICARUS_TM	4	106	DNA/Mariner	d	0.8654	1.625	606
tae-miR1127k.13	3	103	ICARUS_TM	2	102	DNA/Mariner	c	0.8515	1.5	626
tae-miR1127k.14	1	105	ICARUS_TM	4	106	DNA/Mariner	d	0.8381	1.3636	628
tae-miR1127k.15	3	114	ICARUS_TM	2	102	DNA/Mariner	c	0.8235	1.5455	519
tae-miR1127k.2	1	103	ICARUS_TM	4	106	DNA/Mariner	d	0.835	1.5455	624
tae-miR1127k.4	3	103	ICARUS_TM	2	102	DNA/Mariner	c	0.8515	1.25	654
tae-miR1127k.5	1	103	ICARUS_TM	4	106	DNA/Mariner	d	0.8641	1.4	663
tae-miR1127k.7	1	103	ICARUS_TM	4	106	DNA/Mariner	d	0.8641	1.4	660
tae-miR1127k.8	1	112	ICARUS_TM	2	104	DNA/Mariner	c	0.8173	1.3846	566
tae-miR1127k.9	3	103	ICARUS_TM	2	102	DNA/Mariner	c	0.8812	1.5	675
tae-miR1127m	4	121	ICARUS_TM	1	107	DNA/Mariner	d	0.789	1.4	481
tae-miR1127n	4	100	HADES_TA	1	97	DNA/Mariner	d	0.8571	1.2	625
tae-miR1127p.1	4	120	ICARUS_TM	1	107	DNA/Mariner	d	0.7798	1.5714	468
tae-miR1127p.2	4	121	ICARUS_TM	1	107	DNA/Mariner	d	0.7727	1.5714	440
tae-miR1127q	4	89	HADES_TA	1	97	DNA/Mariner	c	0.9205	2.5	563
tae-miR1127r.1	1	88	AsDRF1	1177	1264	DNA	d	0.7931	3.2	349
tae-miR1127r.2	4	102	TREP220	1	109	DNA	c	0.76	1.3846	348
tae-miR1127s.1	4	93	ICARUS_TM	1	80	DNA/Mariner	d	0.8025	1.5	386
tae-miR1127s.2	4	123	ICARUS_TM	1	101	DNA/Mariner	d	0.7864	1.4286	416
tae-miR1127u	4	110	ICARUS_TM	1	107	DNA/Mariner	c	0.8972	1.375	752
tae-miR1127x	1	93	ICARUS_TM	12	104	DNA/Mariner	c	0.8172	1.4167	541
tae-miR1127y	4	88	TREP220	1	109	DNA	c	0.8539	4	385
tae-miR1127z.1	1	84	ICARUS_TM	17	104	DNA/Mariner	c	0.7586	1.8	386
tae-miR1127z.2	3	113	ICARUS_TM	2	102	DNA/Mariner	c	0.8725	1.7143	606
tae-miR1127z.4	1	103	ICARUS_TM	4	106	DNA/Mariner	d	0.8155	1.3571	575
tae-miR1127z.5	1	103	ICARUS_TM	4	106	DNA/Mariner	d	0.8252	1.2857	600
tae-miR1127z.6	3	103	ICARUS_TM	2	102	DNA/Mariner	c	0.8515	1.5	620
tae-miR1128aa	4	89	ATHOS_HV	1	85	DNA/Mariner	d	0.7586	2.8333	268
tae-miR1128aaa	4	110	ICARUS_TM	1	107	DNA/Mariner	c	0.8598	1.25	693
tae-miR1128aab	4	110	ICARUS_TM	1	107	DNA/Mariner	d	0.9065	1.25	775
tae-miR1128aac	4	120	ICARUS_TM	1	107	DNA/Mariner	c	0.8056	1.6667	515
tae-miR1128aad	4	110	ICARUS_TM	1	107	DNA/Mariner	c	0.8411	1.5455	636
tae-miR1128aae	4	104	HADES_TA	1	97	DNA/Mariner	d	0.9192	3	698
tae-miR1128aah	4	112	ICARUS_TM	1	107	DNA/Mariner	d	0.844	1.3636	663
tae-miR1128aai	4	86	HADES_TA	1	97	DNA/Mariner	c	0.8953	1.5	497
tae-miR1128aaj	4	97	HADES_TA	1	97	DNA/Mariner	c	0.8542	1.5714	554
tae-miR1128aak.2	4	110	ICARUS_TM	1	107	DNA/Mariner	c	0.9065	1.6667	753
tae-miR1128aal	4	99	HADES_TA	1	97	DNA/Mariner	d	0.8673	1.25	620
tae-miR1128aam	4	100	HADES_TA	1	97	DNA/Mariner	d	0.9485	1.25	805
tae-miR1128aan	19	106	Mariner-1_BDi	41	129	DNA/Mariner	d	0.764	2.2222	367
tae-miR1128aau	4	98	HADES_TA	1	95	DNA/Mariner	d	0.9474	1.25	788
tae-miR1128aav	4	111	ICARUS_TM	1	107	DNA/Mariner	c	0.8981	1.1111	795
tae-miR1128aaw	4	87	TREP220	1	109	DNA	d	0.7674	1.3077	307
tae-miR1128aax	4	100	HADES_TA	1	97	DNA/Mariner	d	0.9072	1.8	681
tae-miR1128aaz	4	100	HADES_TA	1	97	DNA/Mariner	c	0.8866	1.5714	650
tae-miR1128aba	4	90	HADES_TA	1	97	DNA/Mariner	d	0.8202	1.4	431
tae-miR1128abb	4	89	AsDRF1	1179	1264	DNA	c	0.7738	3	292
tae-miR1128abc	4	93	ICARUS_TM	1	107	DNA/Mariner	c	0.8571	1.5	522
tae-miR1128abd	48	75	TREP220	1	28	DNA	c	1	99	264
tae-miR1128abm	4	110	ICARUS_TM	1	107	DNA/Mariner	d	0.8411	1.3077	649
tae-miR1128abn	4	82	HADES_TA	1	97	DNA/Mariner	c	0.9383	1	569
tae-miR1128abu	4	92	AsDRF1	1176	1264	DNA	c	0.7865	4	343
tae-miR1128abv	17	64	HADES_TA	50	97	DNA/Mariner	d	0.8542	1.1667	326
tae-miR1128abw	4	75	HADES_TA	1	97	DNA/Mariner	c	0.9054	2.5	422
tae-miR1128abx	4	110	ICARUS_TM	1	107	DNA/Mariner	d	0.8318	1.2857	634
tae-miR1128aby	1	116	Mariner-1_BDi	1	131	DNA/Mariner	c	0.7686	1.5385	388
tae-miR1128aca	22	68	Helitron-N25_OS	2187	2231	DNA/Helitron	d	0.8478	3	254
tae-miR1128acb	50	88	Helitron-N28B_OS	2656	2699	DNA/Helitron	d	0.875	2	241
tae-miR1128acc	4	70	ICARUS_TM	41	107	DNA/Mariner	c	0.7941	1.7143	314
tae-miR1128acd	4	99	HADES_TA	1	97	DNA/Mariner	d	0.7447	1.3125	320
tae-miR1128acg	4	59	DNA-TA-1_ZM	27	84	DNA	c	0.7759	1.4286	241
tae-miR1128ach.1	4	31	ICARUS_TM	80	107	DNA/Mariner	c	0.9643	1	245
tae-miR1128ach.1	34	62	ICARUS_TM	79	107	DNA/Mariner	d	0.9655	1	255
tae-miR1128ack	24	54	STOWAWAY51_OS	2	32	DNA/Mariner	c	0.9032	1.5	234
tae-miR1128ae	4	129	TREP216	1	127	DNA/Mariner	d	0.9134	1.6667	941
tae-miR1128af	62	89	EnSpm-N2_TA	6554	6581	DNA/EnSpm/CACTA	c	1	99	264
tae-miR1128ak	4	101	HADES_TA	1	97	DNA/Mariner	c	0.8367	1.6667	595
tae-miR1128am	4	97	MIDWAY	455	551	DNA/EnSpm/CACTA	d	0.7234	1.5	243
tae-miR1128an	4	120	ICARUS_TM	1	107	DNA/Mariner	c	0.8426	1.7778	573
tae-miR1128as	4	97	HADES_TA	1	97	DNA/Mariner	d	0.8542	1.5	582
tae-miR1128at.2	4	151	THALOS_AT	1	157	DNA/Mariner	c	0.8844	1.4444	893
tae-miR1128au	4	120	ICARUS_TM	1	107	DNA/Mariner	d	0.7963	1.4	510
tae-miR1128aw	4	89	HADES_TA	1	97	DNA/Mariner	c	0.8046	1.1429	459
tae-miR1128ax	4	89	HADES_TA	1	97	DNA/Mariner	d	0.8636	1.25	530
tae-miR1128az	4	100	HADES_TA	1	97	DNA/Mariner	c	0.866	1.4444	658
tae-miR1128b	4	130	TREP216	1	127	DNA/Mariner	d	0.8031	1.7857	703
tae-miR1128c	4	130	TREP216	1	127	DNA/Mariner	c	0.811	1.7143	712
tae-miR1128e.1	4	160	STOWAWAY1_HV	1	166	DNA	d	0.8491	2.1111	872
tae-miR1128f.1	4	61	HADES_TA	40	97	DNA/Mariner	c	0.8621	1.1429	400
tae-miR1128f.2	10	64	HADES_TA	43	97	DNA/Mariner	d	0.8364	1.5	338
tae-miR1128g	4	121	ICARUS_TM	1	107	DNA/Mariner	d	0.7982	1.9	468
tae-miR1128h	4	164	STOWAWAY1_HV	1	166	DNA	d	0.8242	1.4706	912
tae-miR1128i	4	120	ICARUS_TM	1	107	DNA/Mariner	d	0.7963	1.4	512
tae-miR1128j	4	168	STOWAWAY1_HV	1	166	DNA	d	0.8667	1.3571	1077
tae-miR1128k	4	106	HADES_TA	1	97	DNA/Mariner	c	0.8265	1.2308	575
tae-miR1128o	4	101	HADES_TA	1	97	DNA/Mariner	c	0.8696	1.6	486
tae-miR1128p.2	4	100	HADES_TA	1	97	DNA/Mariner	d	0.8469	1.1818	574
tae-miR1128p.3	4	88	HADES_TA	1	97	DNA/Mariner	d	0.8523	1.1111	503
tae-miR1128r	4	100	HADES_TA	1	97	DNA/Mariner	d	0.9278	1.4	765
tae-miR1128s	4	100	HADES_TA	1	97	DNA/Mariner	c	0.9175	1.6	741
tae-miR1128v	4	131	ICARUS_TM	1	107	DNA/Mariner	c	0.7727	1.5714	387
tae-miR1130l	27	76	STOWAWAY8_OS	211	258	DNA	d	0.8	2	221
tae-miR1130u	32	75	STOWAWAY1_HV	4	48	DNA	c	0.8444	2.5	228
tae-miR1131b	1	57	EnSpm-4_HV	112	167	DNA/EnSpm/CACTA	d	0.9298	3	416
tae-miR1132aa	1	80	DNA-TA-1_ZM	3	80	DNA	c	0.7	1.8333	231
tae-miR1132c	1	91	HADES_TA	3	93	DNA/Mariner	c	0.8043	1.3333	527
tae-miR1132e	1	60	HADES_TA	5	64	DNA/Mariner	d	0.7705	2.4	213
tae-miR1132g.1	1	91	HADES_TA	5	95	DNA/Mariner	d	0.9121	1.1429	709
tae-miR1132g.2	1	80	HADES_TA	5	95	DNA/Mariner	d	0.8519	1.2222	454
tae-miR1132g.3	16	60	HADES_TA	51	95	DNA/Mariner	d	0.8889	1.25	329
tae-miR1132g.4	3	55	HADES_TA	43	95	DNA/Mariner	d	0.8302	1.5	322
tae-miR1132i	1	101	ICARUS_TM	5	105	DNA/Mariner	d	0.8911	1.375	738
tae-miR1132j	2	101	ICARUS_TM	6	105	DNA/Mariner	d	0.91	1.2857	731
tae-miR1132k	1	80	HADES_TA	5	95	DNA/Mariner	d	0.878	1.1429	519
tae-miR1132l	2	105	ICARUS_TM	3	102	DNA/Mariner	c	0.8462	2	577
tae-miR1132n.2	1	83	TREP220	3	105	DNA	c	0.7765	1.5	293
tae-miR1132n.3	32	59	STOWAWAY30-3_OS	73	100	DNA	d	0.9286	1	230
tae-miR1132p.1	1	80	TREP220	3	105	DNA	c	0.7882	2.1667	294
tae-miR1132q	39	64	DNA-TA-1_BDi	1	26	DNA	c	1	99	247
tae-miR1132r	1	83	HADES_TA	5	95	DNA/Mariner	d	0.759	2.8333	248
tae-miR1132t	1	73	TREP220	3	105	DNA	c	0.859	1.5	332
tae-miR1132u.1	2	80	ICARUS_TM	3	102	DNA/Mariner	c	0.7711	1.5	256
tae-miR1132u.2	1	102	ICARUS_TM	5	105	DNA/Mariner	d	0.8922	1.4286	684
tae-miR1132v	2	104	ICARUS_TM	6	105	DNA/Mariner	d	0.7624	1.4375	435
tae-miR1132w	1	74	STOWAWAY27_OS	4	87	DNA	c	0.7067	1.1176	201
tae-miR1132y	1	79	AsDRF1	1182	1260	DNA	c	0.8026	6	270
tae-miR1132z	45	72	Mariner-N2_ALy	215	242	DNA/Mariner	d	0.9286	2	220
tae-miR1133aa	5	87	HADES_TA	1	97	DNA/Mariner	c	0.8953	1.5	497
tae-miR1133aaa	5	89	AsDRF1	1180	1264	DNA	d	0.8049	6.5	316
tae-miR1133aab	5	93	TREP220	1	109	DNA	c	0.7912	1.5	348
tae-miR1133aae	5	52	ICARUS_TM	60	107	DNA/Mariner	c	0.7917	2.5	212
tae-miR1133aah	5	111	ICARUS_TM	1	107	DNA/Mariner	d	0.8318	1.2857	634
tae-miR1133aai	5	111	ICARUS_TM	1	107	DNA/Mariner	c	0.8598	1.5	669
tae-miR1133aaj	5	111	ICARUS_TM	1	107	DNA/Mariner	c	0.9159	1.125	797
tae-miR1133aak	5	90	TREP220	1	109	DNA	c	0.8022	2.1667	349
tae-miR1133aal	5	105	ICARUS_TM	1	107	DNA/Mariner	d	0.8511	1.2222	473
tae-miR1133aap	5	73	HADES_TA	1	97	DNA/Mariner	c	0.9437	2	410
tae-miR1133aaz	5	89	ICARUS_TA	1	78	DNA/Mariner	c	0.8108	2	251
tae-miR1133ab	5	131	ICARUS_TM	1	107	DNA/Mariner	d	0.7982	1.4286	462
tae-miR1133ad	51	106	TREP216	1	56	DNA/Mariner	c	0.7857	6	235
tae-miR1133aj	5	99	HADES_TA	1	95	DNA/Mariner	d	0.9474	1.25	788
tae-miR1133ap	5	86	HADES_TA	1	97	DNA/Mariner	c	0.8706	2	438
tae-miR1133as	5	121	ICARUS_TM	1	107	DNA/Mariner	c	0.8426	1.4545	592
tae-miR1133at	5	118	ICARUS_TM	1	107	DNA/Mariner	c	0.8318	1.5	560
tae-miR1133av	5	106	ICARUS_TM	1	107	DNA/Mariner	c	0.8155	1.1333	573
tae-miR1133ax	36	92	TREP216	1	57	DNA/Mariner	c	0.807	11	261
tae-miR1133ay	5	32	ICARUS_TM	80	107	DNA/Mariner	c	0.9643	1	232
tae-miR1133b	5	30	TREP220	1	26	DNA	d	0.9231	1	214
tae-miR1133b	56	87	Helitron-N28B_OS	2668	2699	DNA/Helitron	d	0.9375	99	245
tae-miR1133c	5	167	STOWAWAY1_HV	1	166	DNA	c	0.8545	1.6923	1046
tae-miR1133e.1	5	101	HADES_TA	1	97	DNA/Mariner	d	0.8469	1.1818	574
tae-miR1133e.2	5	89	HADES_TA	1	97	DNA/Mariner	d	0.8523	1.1111	503
tae-miR1133f	5	122	ICARUS_TM	1	107	DNA/Mariner	d	0.789	1.4	481
tae-miR1133h	5	121	ICARUS_TM	1	107	DNA/Mariner	d	0.789	1.5	477
tae-miR1133i	5	121	ICARUS_TM	1	107	DNA/Mariner	d	0.7798	1.5714	481
tae-miR1133j	5	94	ICARUS_TM	1	80	DNA/Mariner	d	0.8025	1.5	386
tae-miR1133k	5	124	ICARUS_TM	1	101	DNA/Mariner	d	0.7864	1.4286	416
tae-miR1133l	5	125	Mariner-1_BDi	1	128	DNA/Mariner	c	0.7934	1.5385	498
tae-miR1133m	5	122	ICARUS_TM	1	107	DNA/Mariner	d	0.7727	1.5714	440
tae-miR1133n	5	101	HADES_TA	1	97	DNA/Mariner	d	0.8571	1.2	625
tae-miR1133p	5	32	TREP220	82	109	DNA	c	1	99	264
tae-miR1133q	5	165	THALOS_AT	1	157	DNA/Mariner	d	0.8861	1.7778	1045
tae-miR1133r	5	98	MIDWAY	455	551	DNA/EnSpm/CACTA	d	0.7234	1.5	243
tae-miR1133s	5	129	ICARUS_TM	1	107	DNA/Mariner	c	0.7818	2	368
tae-miR1133u	5	121	ICARUS_TM	1	107	DNA/Mariner	c	0.8426	1.7778	573
tae-miR1133x	5	79	ICARUS_TM	33	107	DNA/Mariner	c	0.8	1.3333	284
tae-miR1133y	5	122	ICARUS_TM	1	107	DNA/Mariner	c	0.8241	1.5	553
tae-miR1135	1	83	ICARUS_TM	16	98	DNA/Mariner	c	0.8795	1.25	555
tae-miR1135a.2	1	91	ICARUS_TM	8	98	DNA/Mariner	c	0.8901	1.4286	619
tae-miR1135aa	1	91	ICARUS_TM	10	100	DNA/Mariner	d	0.8681	1.5	612
tae-miR1135ab	2	91	ICARUS_TM	11	100	DNA/Mariner	d	0.8556	1.1818	576
tae-miR1135ac	1	81	ICARUS_TM	17	98	DNA/Mariner	c	0.8537	1.375	496
tae-miR1135ad	1	91	ICARUS_TM	8	98	DNA/Mariner	c	0.9121	1.1429	703
tae-miR1135ae	10	70	HADES_TA	8	70	DNA/Mariner	c	0.7903	2.4	274
tae-miR1135af	1	91	ICARUS_TM	10	100	DNA/Mariner	d	0.8571	1.4444	597
tae-miR1135ag	1	91	ICARUS_TM	10	100	DNA/Mariner	d	0.8571	1.4444	598
tae-miR1135ah	1	91	ICARUS_TM	8	98	DNA/Mariner	c	0.8242	1.3333	550
tae-miR1135ai	1	91	ICARUS_TM	8	98	DNA/Mariner	c	0.8571	1.3	617
tae-miR1135aj	1	91	ICARUS_TM	8	98	DNA/Mariner	c	0.8681	1.3333	591
tae-miR1135ak	31	101	ICARUS_TM	8	78	DNA/Mariner	c	0.8592	1.4286	462
tae-miR1135am	1	92	ICARUS_TM	8	98	DNA/Mariner	c	0.9239	1.5	693
tae-miR1135an	1	90	ICARUS_TM	10	98	DNA/Mariner	c	0.9222	2	664
tae-miR1135ao	1	91	ICARUS_TM	10	100	DNA/Mariner	d	0.8571	1.3	607
tae-miR1135ap	28	101	ICARUS_TM	8	81	DNA/Mariner	c	0.8514	1.5714	447
tae-miR1135aq	1	92	ICARUS_TM	8	98	DNA/Mariner	c	0.9348	1.25	718
tae-miR1135ar	1	91	ICARUS_TM	10	100	DNA/Mariner	d	0.956	1.3333	727
tae-miR1135as	1	90	ICARUS_TM	10	99	DNA/Mariner	d	0.8778	1.375	597
tae-miR1135at	1	101	ICARUS_TM	10	100	DNA/Mariner	d	0.8261	1.5	493
tae-miR1135au	1	101	ICARUS_TM	8	98	DNA/Mariner	c	0.8043	1.4167	458
tae-miR1135av	4	31	ICARUS_TM	1	28	DNA/Mariner	c	0.9286	2	222
tae-miR1135aw	23	57	ICARUS_TM	66	100	DNA/Mariner	d	0.8571	1.25	237
tae-miR1135b.1	2	91	ICARUS_TM	11	100	DNA/Mariner	d	0.8111	1.5455	512
tae-miR1135b.2	1	101	ICARUS_TM	10	100	DNA/Mariner	d	0.8587	1.7143	539
tae-miR1135c	2	89	ICARUS_TM	8	97	DNA/Mariner	c	0.8427	1.4444	538
tae-miR1135d	1	101	ICARUS_TM	8	98	DNA/Mariner	c	0.8587	1.7143	542
tae-miR1135e	1	91	ICARUS_TM	8	98	DNA/Mariner	c	0.8901	1.4286	652
tae-miR1135f	1	71	ICARUS_TM	28	98	DNA/Mariner	c	0.8169	1.625	447
tae-miR1135g.1	1	100	ICARUS_TM	8	98	DNA/Mariner	c	0.8152	1.4545	487
tae-miR1135g.2	1	91	ICARUS_TM	8	98	DNA/Mariner	c	0.8352	1.5	555
tae-miR1135g.3	1	102	ICARUS_TM	8	98	DNA/Mariner	c	0.8043	1.5455	456
tae-miR1135h.1	2	91	ICARUS_TM	11	100	DNA/Mariner	d	0.8444	1.2727	581
tae-miR1135h.2	1	91	ICARUS_TM	10	100	DNA/Mariner	d	0.8462	1.4	583
tae-miR1135i	1	91	ICARUS_TM	8	98	DNA/Mariner	c	0.8681	1.3333	621
tae-miR1135j	2	91	ICARUS_TM	11	100	DNA/Mariner	d	0.8778	1.375	626
tae-miR1135k	4	84	ICARUS_TM	12	92	DNA/Mariner	d	0.9012	1.1429	602
tae-miR1135l.1	1	91	ICARUS_TM	10	100	DNA/Mariner	d	0.9011	1.125	688
tae-miR1135l.3	1	91	ICARUS_TM	10	100	DNA/Mariner	d	0.8791	1.1	659
tae-miR1135n	1	91	ICARUS_TM	10	100	DNA/Mariner	d	0.9011	1.5	668
tae-miR1135o	2	91	ICARUS_TM	8	97	DNA/Mariner	c	0.8333	1.1538	578
tae-miR1135p	1	111	TREP216	10	120	DNA/Mariner	d	0.7658	1.5	494
tae-miR1135r.1	1	101	ICARUS_TM	8	98	DNA/Mariner	c	0.8043	1.7	446
tae-miR1135r.2	1	72	ICARUS_TM	10	81	DNA/Mariner	d	0.8472	1.375	462
tae-miR1135v	1	91	ICARUS_TM	8	98	DNA/Mariner	c	0.7912	1.3571	516
tae-miR1135w	1	91	ICARUS_TM	10	100	DNA/Mariner	d	0.8681	1.7143	603
tae-miR1135y	1	91	ICARUS_TM	10	100	DNA/Mariner	d	0.8791	1.5714	628
tae-miR1135z	1	82	ICARUS_TM	10	91	DNA/Mariner	d	0.8659	1.2222	560
tae-miR1136a.2	1	63	ICARUS_TM	23	85	DNA/Mariner	d	0.8889	1.4	448
tae-miR1136a.3	1	65	ICARUS_TM	23	87	DNA/Mariner	d	0.9385	1.3333	522
tae-miR1136aa	3	64	ICARUS_TM	22	83	DNA/Mariner	c	0.9032	2	446
tae-miR1136ab	1	64	ICARUS_TM	21	85	DNA/Mariner	c	0.8	2	319
tae-miR1136ac	1	65	ICARUS_TM	23	87	DNA/Mariner	d	0.9231	1.25	507
tae-miR1136ad	9	64	ICARUS_TM	22	77	DNA/Mariner	c	0.7679	4.3333	222
tae-miR1136af	10	64	ICARUS_TM	32	86	DNA/Mariner	d	0.7636	3.25	220
tae-miR1136b	1	65	ICARUS_TM	21	85	DNA/Mariner	c	0.8308	1.375	399
tae-miR1136c	1	65	ICARUS_TM	23	87	DNA/Mariner	d	0.8769	1.3333	453
tae-miR1136d	1	65	ICARUS_TM	23	87	DNA/Mariner	d	0.8615	1.125	447
tae-miR1136e	1	65	ICARUS_TM	21	85	DNA/Mariner	c	0.8615	1.125	447
tae-miR1136f	1	63	ICARUS_TM	23	85	DNA/Mariner	c	0.8889	1.1667	458
tae-miR1136g	1	64	ICARUS_TM	23	86	DNA/Mariner	d	0.8281	1.1	409
tae-miR1136i	1	65	ICARUS_TM	23	87	DNA/Mariner	d	0.8154	1.0909	402
tae-miR1136j	1	65	ICARUS_TM	23	87	DNA/Mariner	d	0.8462	1.1111	432
tae-miR1136k	1	65	ICARUS_TM	23	87	DNA/Mariner	d	0.8308	1.2222	407
tae-miR1136l	1	65	ICARUS_TM	23	87	DNA/Mariner	d	0.8769	1.1429	462
tae-miR1136m	1	65	ICARUS_TM	21	85	DNA/Mariner	c	0.8462	1.1111	432
tae-miR1136n	1	66	ICARUS_TM	21	85	DNA/Mariner	c	0.8939	1.2	464
tae-miR1136p	1	65	ICARUS_TM	23	87	DNA/Mariner	d	0.8923	1.1667	477
tae-miR1136r	1	65	ICARUS_TM	23	87	DNA/Mariner	d	0.8	1.3	367
tae-miR1136t	1	65	ICARUS_TM	21	85	DNA/Mariner	c	0.8615	1.5	429
tae-miR1136u	1	63	ICARUS_TM	23	85	DNA/Mariner	c	0.8889	2.3333	429
tae-miR1136v	1	63	ICARUS_TM	23	85	DNA/Mariner	d	0.9206	1.25	488
tae-miR1136w	1	65	ICARUS_TM	23	87	DNA/Mariner	d	0.8923	2.3333	448
tae-miR1136x	3	63	ICARUS_TM	23	83	DNA/Mariner	c	0.918	1.25	469
tae-miR1136y	1	65	ICARUS_TM	23	87	DNA/Mariner	d	0.8615	1.125	449
tae-miR1136z	2	64	ICARUS_TM	24	86	DNA/Mariner	d	0.8889	1.75	442
tae-miR1137d	1	45	HADES_TA	30	74	DNA/Mariner	c	0.8913	1.5	277
tae-miR1137e	1	51	HADES_TA	24	74	DNA/Mariner	d	0.8654	1.6667	297
tae-miR1137f	1	51	HADES_TA	24	74	DNA/Mariner	c	0.8077	1.3333	252
tae-miR1137g	1	51	HADES_TA	24	74	DNA/Mariner	c	0.8462	1.5	279
tae-miR1137k	1	46	HADES_TA	24	69	DNA/Mariner	d	0.8936	1.5	291
tae-miR1137l	1	53	HADES_TA	22	74	DNA/Mariner	c	0.8889	2	331
tae-miR1137o	1	53	HADES_TA	24	76	DNA/Mariner	d	0.9623	1	445
tae-miR1137p	64	104	HADES_TA	57	97	DNA/Mariner	c	0.8293	1.75	246
tae-miR1137q	1	51	HADES_TA	24	74	DNA/Mariner	d	0.8654	1.6667	294
tae-miR1137r	5	52	HADES_TA	28	75	DNA/Mariner	d	0.8776	1.3333	295
tae-miR1139c	5	53	HADES_TA	28	76	DNA/Mariner	d	0.92	2	333
tae-miR1320b	4	116	TREP216	1	127	DNA/Mariner	c	0.9035	2	769
tae-miR1435a	1	124	STOWAWAY14_SB	36	176	DNA	d	0.746	1.6667	419
tae-miR1435b	1	124	STOWAWAY14_SB	34	174	DNA	c	0.7402	1.8125	376
tae-miR1435c	5	189	DNA-2-N2_TA	36	218	DNA	c	0.8595	1.7143	1096
tae-miR1436a	2	123	TREP216	2	124	DNA/Mariner	c	0.813	1.6923	677
tae-miR1436aa.1	1	93	HADES_TA	4	96	DNA/Mariner	d	0.9247	1.4	699
tae-miR1436aa.2	1	79	HADES_TA	2	94	DNA/Mariner	c	0.925	1	576
tae-miR1436aaa.1	1	95	TREP220	2	106	DNA	c	0.75	1.3846	269
tae-miR1436aab	1	113	ICARUS_TM	2	104	DNA/Mariner	c	0.8269	1.4167	578
tae-miR1436aae.1	1	81	AsDRF1	1181	1261	DNA	c	0.7625	2.8333	277
tae-miR1436aae.2	1	81	AsDRF1	1181	1261	DNA	c	0.775	5.3333	292
tae-miR1436aae.3	1	75	TREP220	2	106	DNA	c	0.8625	1.5	350
tae-miR1436aaf	14	81	AsDRF1	1196	1263	DNA	d	0.7846	2.2	236
tae-miR1436aag	1	81	AsDRF1	1181	1261	DNA	c	0.75	2.5714	277
tae-miR1436aaj.1	1	78	HADES_TA	2	94	DNA/Mariner	c	0.8889	1.5	449
tae-miR1436aaj.2	1	82	HADES_TA	2	94	DNA/Mariner	c	0.9518	1.5	632
tae-miR1436aar.1	50	80	Helitron-N28B_OS	2668	2698	DNA/Helitron	d	0.9032	3	224
tae-miR1436aar.2	37	67	Helitron-N28B_OS	2668	2698	DNA/Helitron	d	0.9032	3	224
tae-miR1436aar.3	27	57	Helitron-N28B_OS	2668	2698	DNA/Helitron	d	0.9032	3	222
tae-miR1436aas	1	75	STOWAWAY27_OS	4	88	DNA	c	0.7105	1.1176	209
tae-miR1436aaw	1	106	TREP220	4	108	DNA	d	0.74	1.6154	295
tae-miR1436aax.2	1	82	TREP220	2	106	DNA	c	0.7931	2.1667	312
tae-miR1436aay	1	81	TREP220	4	108	DNA	d	0.8256	2	304
tae-miR1436aaz	1	81	AsDRF1	1181	1261	DNA	c	0.8077	6	286
tae-miR1436ab	1	93	HADES_TA	2	94	DNA/Mariner	c	0.8925	1.6667	636
tae-miR1436abc.1	1	113	ICARUS_TM	4	106	DNA/Mariner	d	0.7692	1.6429	449
tae-miR1436abc.2	3	113	ICARUS_TM	2	102	DNA/Mariner	c	0.8725	1.5	608
tae-miR1436abd	1	80	AsDRF1	1181	1261	DNA	c	0.7625	2.6667	262
tae-miR1436abf	1	80	TREP220	3	106	DNA	c	0.7901	1.4	293
tae-miR1436abg	1	81	AsDRF1	1183	1263	DNA	d	0.7531	2.8571	319
tae-miR1436abh	1	80	AsDRF1	1183	1263	DNA	d	0.775	3	290
tae-miR1436abi.1	1	82	DNA-TA-1_ZM	2	81	DNA	c	0.7073	1.8333	249
tae-miR1436abi.2	3	82	DNA-TA-1_ZM	6	83	DNA	d	0.7564	1.875	258
tae-miR1436abk	1	65	HADES_TA	2	94	DNA/Mariner	c	0.9403	2	405
tae-miR1436abl	30	58	TREP220	2	30	DNA	c	0.931	2	217
tae-miR1436abm	1	68	HADES_TA	2	94	DNA/Mariner	c	0.9	2.5	387
tae-miR1436ac	1	81	ATHOS_HV	2	82	DNA/Mariner	c	0.75	2.5714	252
tae-miR1436ad	14	81	AsDRF1	1181	1248	DNA	c	0.7536	2.3333	213
tae-miR1436ae.1	1	159	THALOS_AT	2	154	DNA/Mariner	c	0.8645	1.4615	981
tae-miR1436af.2	3	123	ICARUS_TM	2	102	DNA/Mariner	c	0.7767	1.4	400
tae-miR1436ah	1	67	HADES_TA	17	94	DNA/Mariner	c	0.8	1	276
tae-miR1436ah	73	142	HADES_TA	2	86	DNA/Mariner	c	0.8356	1	322
tae-miR1436aj.1	1	82	HADES_TA	2	94	DNA/Mariner	c	0.8333	1.2	437
tae-miR1436aj.10	4	57	HADES_TA	43	96	DNA/Mariner	d	0.8333	1.5	330
tae-miR1436aj.11	1	68	HADES_TA	2	94	DNA/Mariner	c	0.8406	1.25	312
tae-miR1436aj.12	11	57	HADES_TA	50	96	DNA/Mariner	d	0.8511	1.1667	318
tae-miR1436aj.13	1	92	HADES_TA	4	96	DNA/Mariner	d	0.7333	1.3125	324
tae-miR1436aj.2	1	82	HADES_TA	4	96	DNA/Mariner	d	0.8571	1.25	467
tae-miR1436aj.3	1	93	HADES_TA	2	94	DNA/Mariner	c	0.8191	1.5	513
tae-miR1436aj.4	1	93	HADES_TA	4	96	DNA/Mariner	d	0.8617	1.375	597
tae-miR1436aj.5	1	82	HADES_TA	2	94	DNA/Mariner	c	0.8452	1.1	489
tae-miR1436aj.6	1	92	HADES_TA	4	96	DNA/Mariner	d	0.8723	1.125	577
tae-miR1436aj.7	1	81	HADES_TA	4	96	DNA/Mariner	d	0.8452	1.1111	468
tae-miR1436aj.8	1	82	HADES_TA	4	96	DNA/Mariner	d	0.8554	1.2222	499
tae-miR1436aj.9	1	74	HADES_TA	4	96	DNA/Mariner	d	0.8462	1.1429	380
tae-miR1436ak.1	3	124	ICARUS_TM	2	102	DNA/Mariner	c	0.7692	1.6154	353
tae-miR1436ak.2	1	113	ICARUS_TM	2	104	DNA/Mariner	c	0.8077	1.4615	537
tae-miR1436al	1	93	HADES_TA	2	94	DNA/Mariner	c	0.914	1.1429	692
tae-miR1436ap.2	1	81	TREP220	4	108	DNA	d	0.8235	2.5	315
tae-miR1436ar	1	93	HADES_TA	2	94	DNA/Mariner	c	0.9247	1.75	687
tae-miR1436as	1	93	HADES_TA	4	96	DNA/Mariner	d	0.9043	1.4	667
tae-miR1436at	1	123	TREP216	4	126	DNA/Mariner	d	0.878	1.6667	850
tae-miR1436au	1	81	AsDRF1	1183	1263	DNA	d	0.7875	3.75	302
tae-miR1436av	1	102	TREP220	4	108	DNA	d	0.7255	1.2353	312
tae-miR1436aw	1	75	HADES_TA	4	96	DNA/Mariner	d	0.8816	1.3333	432
tae-miR1436ax	1	25	TREP220	82	106	DNA	c	1	99	222
tae-miR1436az	3	82	DNA-TA-1_ZM	6	83	DNA	d	0.7375	1.7273	307
tae-miR1436c.1	1	97	HADES_TA	2	94	DNA/Mariner	c	0.8936	1.2857	661
tae-miR1436c.2	1	82	HADES_TA	2	94	DNA/Mariner	c	0.9167	2.5	559
tae-miR1436d	1	98	HADES_TA	4	96	DNA/Mariner	d	0.9043	1.3333	672
tae-miR1436e.1	1	153	STOWAWAY1_HV	4	165	DNA	d	0.8452	2.1111	837
tae-miR1436e.2	1	159	STOWAWAY1_HV	2	163	DNA	c	0.8137	1.7333	841
tae-miR1436e.5	1	160	STOWAWAY1_HV	4	165	DNA	d	0.8199	2	860
tae-miR1436f.10	1	161	STOWAWAY1_HV	4	165	DNA	d	0.8457	2	908
tae-miR1436f.11	1	161	STOWAWAY1_HV	2	163	DNA	c	0.8519	2	896
tae-miR1436f.12	1	161	STOWAWAY1_HV	2	163	DNA	c	0.858	1.6364	970
tae-miR1436f.13	1	161	STOWAWAY1_HV	2	163	DNA	c	0.8571	1.6667	1000
tae-miR1436f.15	1	160	STOWAWAY1_HV	4	165	DNA	d	0.821	1.8462	845
tae-miR1436f.18	1	160	STOWAWAY1_HV	2	163	DNA	c	0.8571	1.9	951
tae-miR1436f.19	1	162	STOWAWAY1_HV	2	163	DNA	c	0.8221	2.3	810
tae-miR1436f.2	1	149	STOWAWAY1_HV	2	163	DNA	c	0.8158	2.0833	763
tae-miR1436f.25	1	154	STOWAWAY1_HV	2	163	DNA	c	0.8141	2.4	772
tae-miR1436f.26	1	153	STOWAWAY1_HV	2	163	DNA	c	0.8323	2.2	818
tae-miR1436f.28	1	36	STOWAWAY1_HV	128	163	DNA	c	0.9444	2	286
tae-miR1436f.28	37	65	THALOS_HV	135	163	DNA/Mariner	d	0.9655	1	250
tae-miR1436f.3	1	149	STOWAWAY1_HV	2	163	DNA	c	0.8224	2.1818	778
tae-miR1436f.4	1	161	STOWAWAY1_HV	4	165	DNA	d	0.8272	2.4	855
tae-miR1436f.5	1	161	STOWAWAY1_HV	2	163	DNA	c	0.8333	1.6923	881
tae-miR1436f.7	1	161	STOWAWAY1_HV	2	163	DNA	c	0.8519	2.375	906
tae-miR1436f.8	1	160	STOWAWAY1_HV	2	163	DNA	c	0.8696	1.5455	1022
tae-miR1436g	1	99	HADES_TA	2	94	DNA/Mariner	c	0.8191	1.2308	540
tae-miR1436h	1	124	TREP216	2	124	DNA/Mariner	c	0.7581	2.2308	515
tae-miR1436k	1	161	STOWAWAY1_HV	2	163	DNA	c	0.8509	1.5	991
tae-miR1436l.1	1	114	ICARUS_TM	4	106	DNA/Mariner	d	0.7905	1.9	464
tae-miR1436l.10	3	113	ICARUS_TM	2	102	DNA/Mariner	c	0.8252	1.4545	521
tae-miR1436l.2	1	113	ICARUS_TM	4	106	DNA/Mariner	d	0.7885	1.4	478
tae-miR1436l.3	1	112	ICARUS_TM	4	106	DNA/Mariner	d	0.7981	1.3571	482
[truncated: 568 more rows]
