# Supplementary material for: Investigation on the Conserved MicroRNA Genes in Higher Plants
Source: Springer Nature journal article supplement (doi:10.1007/s11105-020-01228-9), 2020-06-15
Supplement: 11105_2020_1228_MOESM4_ESM.xlsx [file 11105_2020_1228_MOESM4_ESM.xlsx]

## Sheet: Table S4-1
Table S4-1 : Predicted miRNA families and number of their genes involved in Liliopsida species
MIRNA family	Plant species
	pvi	sit	sbi	zma	bdi	tae	hvu	oza
mir1023			1
mir1044								1(1)*
mir1058						1(1)
mir1117						5(5)	1(1)
mir1118						6	2	2(2)
mir1119
mir1120						49(11)	12(2)	33(33)
mir1121						2(1)
mir1122					2(2)	17(14)	2(2)
mir1123						1
mir1124						1
mir1125						1(1)
mir1126						4(4)	4(4)
mir1127	5(5)		1	2(2)	17(11)	189(120)	67(59)	32(31)
mir1128	13(13)	2(2)	3(3)		16(14)	125(123)	73(70)	46
mir1130						21(2)	4(1)	10(10)
mir1131						1(1)
mir1132	7(7)				13(9)	41(23)	5(2)	10(10)
mir1133	6(6)	2(2)		1(1)	3(2)	79(39)	57	23(23)
mir1135	1					59(49)	3(1)
mir1136	12					33(28)	1(1)
mir1137						16(10)	1(1)
mir1139						2(1)
mir1147							1
mir1161						1
mir1318							1	1
mir1319								1(1)
mir1320						2(1)	1(1)	6(4)
mir1425								1
mir1426			2
mir1427
mir1428								1
mir1430								1
mir1431								1(0)
mir1432							1	1
mir1433						1
mir1435	1(1)				1(1)	3(3)		1(1)
mir1436	12(12)	1(1)	1(1)	5(4)	31(29)	199(129)	140(123)	92(90)
mir1438								1(1)
mir1439	20(20)	1(1)		1(1)	14(12)	151(77)	94(90)	40(35)
mir1449	1(1)
mir1507	1
mir1514				1(1)
mir1522				1				1(1)
mir1533	2(1)
mir156	3		2	3(1)		1		5
mir157	1
mir159	2			2
mir160	1			2			1	1
mir164				1
mir165	1			1
mir166	2			3		1(1)	1
mir167	6			1		1	1	1
mir168			1	1
mir169	8(1)		1			1		2
mir171				2			1	2
mir1847								2(1)
mir1848								1(1)
mir1849								1(1)
mir1850								1(1)
mir1851								2
mir1854								2
mir1862								11(10)
mir1867								4(4)
mir1884								59(59)
mir1919								1(1)
mir2055
mir2082								1
mir2096							1	1
mir2102	1(1)							1
mir2108						1
mir2118							1
mir2123								38(38)
mir2218								1
mir2275						1(1)
mir2595								1
mir2630				1
mir2662								1
mir2673				1		1	3(2)	2
mir2864					1
mir2919	3(1)			46(2)	5(1)	5(1)	2	7
mir2924
mir2925				1
mir2928	1						1
mir319	4			3			1
mir3436				1
mir390	1							1
mir393					1			1
mir3948					1
mir395						2		1
mir396	1			1(1)				2(1)
mir397						2	1
mir3979	1			1			1(1)
mir398								1
mir3980				1
mir3981								3(3)
mir399	2
mir414	2(1)			1(1)				1
mir420								1(1)
mir4227							1(1)
mir4249				1(1)
mir4342			1(1)
mir435
mir437	2(2)		2(2)		3(3)	2(2)	1(1)	3(3)
mir438
mir439								1(1)
mir441								45(43)
mir442	6(6)						1	6(6)
mir443								1(1)
mir444	4(3)		7(3)	10(1)	2	5		7(2)
mir445		1(1)						4(4)
mir446								59(58)
mir477								1(1)
mir479								1
mir482	2(2)					2		2
mir4825						1(1)
mir4993			1	1				5(2)
mir5021	1		1				1	4(1)
mir5049					1	5	14(1)
mir5050							1(1)
mir5051						2	1
mir5057								1(1)
mir5060				1		1		1
mir5064						1
mir5067				1(1)	3(1)	15(6)	5(1)
mir5068					1(1)
mir5070					1(1)		1
mir5075	1(1)							1
mir5145							1
mir5150								1
mir5151							1
mir5159					1			2
mir5161	2(2)	1(1)		1(1)	12(9)	60(19)	27(14)	7(7)
mir5164						1(1)
mir5169	3(3)		1(1)	1(1)	2(2)	4(4)	2(2)	6(6)
mir5170
mir5171					16(16)	4	2(2)	*(2)
mir5174					12(6)
mir5175		1		2(2)	29(17)	163(108)	87(67)	3(3)
mir5180					1(1)	6(2)	2(2)
mir5181					15(11)	28(15)	20(18)
mir5183						6(4)
mir5203					14(9)	16(10)	11(9)	1(1)
mir5205	15(15)		2(2)	5(1)	7(5)	165(59)	69(64)	16(16)
mir5261						1
mir528			1
mir5281						8(5)
mir529	2		1					3
mir530							1
mir5337								1(1)
mir5340								1(1)
mir535
mir5381							32
mir5382	1	1		1(1)				1(1)
mir5383
mir5384	1(1)			2(1)		2(1)
mir5386								1(1)
mir5542								1(1)
mir5543	1
mir5564			2
mir5565			21(21)	2			1
mir5566
mir5567								1(1)
mir5568	5(4)	1(1)	2(2)	2(2)
mir5645						1
mir5658				1	1
mir806								17(17)
mir808								41(41)
mir809								33(33)
mir812								35(34)
mir813								1(1)
mir814								14(14)
mir815	1(1)
mir816								1(1)
mir817								2(2)
mir818						43(9)	8	33(33)
mir819								96(70)
mir820								3
mir827	1			1(1)
mir837				1		1
mir838						1(1)
mir841	1
mir845								1
mir847	1							1
mir854			1(1)			1		1
mir855	1
mir902							1
* The number in the parentheses indicate transposable element containing pre-miRNA in the predicted miRNA gene family

## Sheet: Table S4-2
Table S4-2 : Predicted MIRNA families and number of their genes involved in Eudicotyledons species
MIRNA family	Plant species
	sly	stu	vvi	egr	bol	bra	mtr	gma	ppe	mdo
mir1023			1				1
mir1028				1
mir1030		1
mir1039								1
mir1046	1(1)*						1
mir1088	1	1						3(1)	1	1
mir1095								1(1)
mir1115					1
mir1127		1(1)	1				4(4)
mir1128	1(1)	1(1)			1(1)		3(3)
mir1133		1(1)					4(4)
mir1134								1
mir1160			1(1)
mir1309					1
mir1435							1
mir1436		1(1)					10(8)
mir1439	1(1)						3(3)
mir1507								1
mir1510							2(1)	3
mir1514							1
mir1520								5(2)
mir1525							1(1)
mir1530								3(1)
mir1533		1	2(2)				2(1)	7(1)
mir1534	1
mir156	2	1				1	1	5	1	3
mir159	2		1					6(1)
mir160			1		1
mir162			1		2					1
mir165								1
mir166								1
mir167	1	1(1)	1	1				5
mir168		1
mir169			1	2
mir170			1		1			2
mir171			1		1			3	1
mir172	2(1)	1	1					2		2
mir1860								1(1)
mir1885					1
mir1916		1
mir2089								1
mir2095		1
mir2111								1
mir2118			1							2
mir2218	1						1	8
mir2275								1
mir2587							2
mir2590							1(1)
mir2593							2
mir2596								1
mir2599							1
mir2602							1(1)
mir2603							1(1)
mir2606								3
mir2608							3(1)
mir2627							1(1)
mir2630			1(1)					1(1)
mir2637							1(1)
mir2652							1
mir2673				1				5(1)
mir2675							4(3)
mir2680		1
mir2868	1
mir2875							1(1)
mir2919	1	3	1	1	1		2		3	1
mir2923		1
mir2936						1
mir319	1		1					7(1)		1
mir3441		1(1)
mir3520		1
mir3522								1
mir3629			1
mir3631			2(2)
mir393										1
mir394			1(1)
mir395			1					1
mir396			1					3(1)
mir397					1
mir3979								1(1)
mir398				2				3(1)		2
mir399	1	1		1			2(1)	3
mir400
mir403								1
mir407								1
mir408								1	1
mir414		1(1)	1(1)				1(1)	4
mir4343								2(2)
mir4347								1(1)
mir4359								1(1)
mir437	1									1
mir4413								1
mir4414	1						1(1)
mir472			1				1	1
mir473				1
mir477	1		1	2
mir482	1	1		4				7	1(1)	3
mir4994								1
mir4995								1
mir5014							1
mir5015								1
mir5016									1
mir5021	3	1	4		2	2	3(1)	11(5)	1	1(1)
mir5038								1
mir5079							1
mir5139			1(1)
mir5140							1	1
mir5142								1	1
mir5161							3(2)	1(1)
mir5175							3(2)
mir5205		3(3)					5(3)	1
mir5231							1
mir5238			1						1
mir5281							9(1)	1(1)
mir5282							2
mir5287							4(1)
mir529	1	1	1				1	5	1	1
mir530		1
mir5301				1
mir5303	8	18(2)
mir5304	1
mir535			1
mir5369										1
mir5382								1
mir5565								1
mir5654							1(1)
mir5658		1	1(1)			1		4(1)
mir5667								2
mir5675								2
mir773					1
mir780	1
mir811			1
mir822							1(1)
mir827		1(1)	1
mir828				1
mir830							1
mir837										1
mir838	1(1)			1	1	1(1)		1(1)		2(1)
mir847		1(1)						1
mir854								1
mir862			1
mir864							1
mir865			1					1
mir902	1							1
* The number in the parentheses indicate transposable element containing pre-miRNA in the predicted miRNA gene family

## Sheet: Table S4-3
Table S4-3 : Predicted miRNA families and number of their genes involved in non-flowering species
MIRNA family	Plant species
	cre	ppa	smo	pta	atr
mir1046					1
mir1082	1		1
mir1090	1		1
mir1094	2		2
mir1098	1		1
mir1102	1		1
mir1132		1
mir1147	1		1
mir1171		1
mir1314				1
mir1512				1(1)*
mir1533		1
mir160	1		1
mir172		1
mir2218				1
mir2670				1
mir2673			1	1(1)
mir2919		3	2
mir3701				1
mir396				2	1
mir398				1
mir408
mir414				1
mir477				1
mir482				1
mir5037		1
mir5234				1
mir529			1
mir5658					1
mir780			1
mir845		1
mir862				1
mir948				1
* The number in the parentheses indicate transposable element containing pre-miRNA in the predicted miRNA gene family
cre: Chlamydomonas reinhardtii; ppa:Physcomitrella patens; smo: Selaginella mellendorffii; pta: Pinus taeda; atr: Amborella trichopoda.				atr
