# Supplementary material for: Investigation on the Conserved MicroRNA Genes in Higher Plants
Source: Springer Nature journal article supplement (doi:10.1007/s11105-020-01228-9), 2020-06-15
Supplement: 11105_2020_1228_MOESM7_ESM.docx [file 11105_2020_1228_MOESM7_ESM.docx]

| **Supplementary S7**: List of *MIR* families gain and lost in plant evolutionary lineages during evolution. | | |
| --- | --- | --- |
| **Lineage** | ***MIR* family gain** | ***MIR*  family lost** |
| **Eukaryota-Viridiplantae** | *MIR*1147, *MIR*1171, *MIR*1222, *MIR*2919, MIR1533 | - |
| **Viridiplantae-Streptophyta** | *MIR*1046, *MIR*1067, *MIR*1132, *MIR*156, *MIR*160, *MIR*166, *MIR*167, *MIR*169, *MIR*171, *MIR*319, *MIR*390, *MIR*395, *MIR*408, *MIR*414, *MIR*477, *MIR*529, *MIR*536, *MIR*902 | - |
| **Streptophyta-Tracheophyta** | *MIR*1087, *MIR*159, *MIR*2673, *MIR*396 | *MIR*1171 |
| **Tracheophyta-Euphyllophyta** | *MIR*2218, *MIR*398, *MIR*482 | *MIR*1147, *MIR*536 |
| **Euphyllophyta-Magnoliophyta** | *MIR*164, *MIR*168, *MIR*393, *MIR*394, *MIR*397, *MIR*482 | - |
| **Magnoliophyta-Mesangiospemae** | *MIR*1127, *MIR*1128, *MIR*1133, *MIR*1436, *MIR*1439, *MIR*162, *MIR*3979, *MIR*5021, *MIR*5205, *MIR*827, *MIR*847, *MIR*2118, *MIR*172, *MIR*5658, *MIR*399 | *MIR*477, *MIR*535 |
| **Mesangiospermae-Eudicotyledon** | *MIR*1088, *MIR*1534, *MIR*1860, *MIR*319, *MIR*3627, *MIR*400, *MIR*407, *MIR*4376, *MIR*4414, *MIR*479, *MIR*530, *MIR*7122, *MIR*838, *MIR*2680, | *MIR*1132, *MIR*159, *MIR*2673, *MIR*414 |
| **Mesangiospermae-Liliopsida** | *MIR*1522, *MIR*2102, *MIR*2275, *MIR*5543, *MIR*5565, *MIR*815, *MIR*820, *MIR*821, *MIR*837, *MIR*854 , *MIR*2925, *MIR*2928, *MIR*1426, *MIR*1432, *MIR*1435, *MIR*437, *MIR*442, *MIR*444, *MIR*445, *MIR*4993, *MIR*5060, *MIR*5067, *MIR*5075, *MIR*5161, *MIR*5169, *MIR*5175, *MIR*528, *MIR*5381, *MIR*5382, *MIR*5384, *MIR*5386 | *MIR*1067, *MIR*1088, *MIR*1533, *MIR*8558, *MIR*902 |
| ***Magnoliophyta- Amborella trichopoda*** | *MIR*2111, *MIR*2950, *MIR*828, *MIR*845, *MIR*8617 | *MIR*1067, *MIR*1132, *MIR*1533, *MIR*2218, *MIR*2673, *MIR*2919, *MIR*408, *MIR*414, *MIR*482, *MIR*529, *MIR*902 |
| ***Euphyllophyta- Pinus taeda*** | *MIR*1309, *MIR*1311, *MIR*1312, *MIR*1313, *MIR*1314, *MIR*1315, *MIR*1316, *MIR*1512, *MIR*2670, *MIR*3701, *MIR*447, *MIR*5234, *MIR*862, *MIR*946, *MIR*947, *MIR*948, *MIR*949, *MIR*950, *MIR*951, *MIR*952, *MIR*9897 | *MIR*1046, *MIR*1067, *MIR*1088, *MIR*1132, *MIR*1533, *MIR*160, *MIR*167, *MIR*172, *MIR*2919, *MIR*395, *MIR*477, *MIR*529, *MIR*535, *MIR*902 |
| **Tracheophyta- *Selaginella moellendorffii*** | *MIR*1080, *MIR*1081, *MIR*1082, *MIR*1083, *MIR*1084, *MIR*1085, *MIR*1086, *MIR*1089, *MIR*1090, *MIR*1091, *MIR*1092, *MIR*1093, *MIR*1094, *MIR*1095, *MIR*1096, *MIR*1097, *MIR*1098, *MIR*1099, *MIR*1100, *MIR*1101, *MIR*1102, *MIR*1103, *MIR*1104, *MIR*1105, *MIR*1106, *MIR*1107, *MIR*1108, *MIR*1109, *MIR*1110, *MIR*1111, *MIR*1112, *MIR*1113, *MIR*1114, *MIR*1115, *MIR*780 | *MIR*1046, *MIR*1067, *MIR*1132, *MIR*1533, *MIR*167, *MIR*172, *MIR*390, *MIR*395, *MIR*477, *MIR*535, *MIR*902 |
| **Streptophyta- *Physcomitrella patens*** | *MIR*1023, *MIR*1024, *MIR*1025, *MIR*1026, *MIR*1027, *MIR*1028, *MIR*1029, *MIR*1030, *MIR*1031, *MIR*1032, *MIR*1033, *MIR*1034, *MIR*1035, *MIR*1036, *MIR*1037, *MIR*1038, *MIR*1039, *MIR*1040, *MIR*1041, *MIR*1042, *MIR*1043, *MIR*1044, *MIR*1045, *MIR*1047, *MIR*1048, *MIR*1049, *MIR*1050, *MIR*1051, *MIR*1052, *MIR*1053, *MIR*1054, *MIR*1055, *MIR*1056, *MIR*1057, *MIR*1058, *MIR*1059, *MIR*1060, *MIR*1061, *MIR*1062, *MIR*1063, *MIR*1064, *MIR*1065, *MIR*1066, *MIR*1068, *MIR*1069, *MIR*1070, *MIR*1071, *MIR*1072, *MIR*1073, *MIR*1074, *MIR*1075, *MIR*1076, *MIR*1077, *MIR*1078, *MIR*1079, *MIR*1211, *MIR*1212, *MIR*1214, *MIR*1215, *MIR*1216, *MIR*1217, *MIR*1218, *MIR*1219, *MIR*1220, *MIR*1221, , *MIR*1223, *MIR*2077, *MIR*2078, *MIR*2079, *MIR*2080, *MIR*2081, *MIR*2082, *MIR*2083, *MIR*2084, *MIR*2085, *MIR*419, *MIR*5037, *MIR*533, *MIR*534, *MIR*537, *MIR*538, *MIR*845, *MIR*893, *MIR*894, *MIR*895, *MIR*897, *MIR*898, *MIR*899, *MIR*900, *MIR*901, *MIR*903, *MIR*904 | *MIR*1147 |
| **Viridiplantae *- Chlamydomonas ReinhaRdtii*** | *MIR*1848, *MIR*1142, *MIR*1143, *MIR*1144, *MIR*1145, *MIR*1146, *MIR*1148, *MIR*1149, *MIR*1150, *MIR*1151, *MIR*1152, *MIR*1153, *MIR*1154, *MIR*1155, *MIR*1156, *MIR*1157, *MIR*1158, *MIR*1159, *MIR*1160, *MIR*1161, *MIR*1162, *MIR*1163, *MIR*1164, *MIR*1165, *MIR*1166, *MIR*1167, *MIR*1168, *MIR*1169, *MIR*1170, *MIR*1172, *MIR*1173, *MIR*905, *MIR*906, *MIR*907, *MIR*908, *MIR*909, *MIR*910, *MIR*911, *MIR*912, *MIR*913, *MIR*914, *MIR*915, *MIR*917, *MIR*918, *MIR*919, *MIR*9897 | - |
| **Eudicotyledon- Asterids** | *MIR*1916, *MIR*1919, *MIR*5303, *MIR*5304 | - |
| **Astreiods - *Solanum tubresom*** | *MIR*1030, *MIR*1886, *MIR*2089, *MIR*2923, *MIR*3520, *MIR*3522, *MIR*384, *MIR*6022, *MIR*6027, *MIR*6149, *MIR*7979, *MIR*7980, *MIR*7981, *MIR*7982, *MIR*7983, *MIR*7984, *MIR*7985, *MIR*7986, *MIR*7987, *MIR*7988, *MIR*7989, *MIR*7990, *MIR*7991, *MIR*7992, *MIR*7993, *MIR*7994, *MIR*7995, *MIR*7996, *MIR*7997, *MIR*7998, *MIR*7999, *MIR*8000, *MIR*8001, *MIR*8002, *MIR*8003, *MIR*8004, *MIR*8005, *MIR*8006, *MIR*8007, *MIR*8008, *MIR*8009, *MIR*8010, *MIR*8011, *MIR*8012, *MIR*8013, *MIR*8014, *MIR*8015, *MIR*8016, *MIR*8017, *MIR*8018, *MIR*8019, *MIR*8020, *MIR*8021, *MIR*8022, *MIR*8023, *MIR*8024, *MIR*8025, *MIR*8026, *MIR*8027, *MIR*8028, *MIR*8029, *MIR*8030, *MIR*8031, *MIR*8032, *MIR*8033, *MIR*8034, *MIR*8035, *MIR*8036, *MIR*8037, *MIR*8038, *MIR*8039, *MIR*8040, *MIR*8041, *MIR*8042, *MIR*8043, *MIR*8044, *MIR*8045, *MIR*8046, *MIR*8047, *MIR*8048, *MIR*8049, *MIR*8050, *MIR*8051 | *MIR*902, *MIR*838, *MIR*4414, *MIR*4340, *MIR*394, *MIR*2218, *MIR*1860, *MIR*156, *MIR*1534, *MIR*1439, *MIR*1046 |
| **Solanum - *Solanum lycopersicum*** | *MIR*1917, *MIR*1918, *MIR*2868, *MIR*437, *MIR*5142, *MIR*5175, *MIR*780, *MIR*9469 *MIR*9470, *MIR*9471, *MIR*9472, *MIR*9473, *MIR*9474, *MIR*9475, *MIR*9476, *MIR*9477 | *MIR*847, *MIR*827, *MIR*7122, *MIR*5658, *MIR*530, *MIR*529, *MIR*5205, *MIR*479, *MIR*408, *MIR*414, *MIR*398, *MIR*393, *MIR*3627, *MIR*2680, *MIR*1533, *MIR*1436, *MIR*1133, *MIR*1127 |
| **Eudicotyledon-Rosids** | *MIR*1023, *MIR*2111, *MIR*472, *MIR*5238, *MIR*535, *MIR*828, *MIR*862, *MIR*865 | - |
| **Rosids- *Vitis vinifere*** | *MIR*1507, *MIR*2936, *MIR*3623, *MIR*3624, *MIR*3625, *MIR*3626, *MIR*3628, *MIR*3629, *MIR*3630, *MIR*3631, *MIR*3632, *MIR*3633, *MIR*3634, *MIR*3635, *MIR*3636, *MIR*3637, *MIR*3638, *MIR*3639, *MIR*3640, *MIR*5139, *MIR*811, *MIR*845 | *MIR*1046, *MIR*1088, *MIR*1128, *MIR*1133, *MIR*1510, *MIR*1511, *MIR*1534, *MIR*1860, *MIR*2218, *MIR*2680, *MIR*4375, *MIR*4414, *MIR*5205, *MIR*530, *MIR*7122, *MIR*838, *MIR*847, *MIR*902 |
| **Rosids- Eurosids** | *MIR*391, *MIR*473 | *MIR*479 |
| **Eurosids-Malvids** | - | *MIR*1023, *MIR*1046, *MIR*1088, *MIR*1127, *MIR*1133, *MIR*1436, *MIR*1439, *MIR*1533, *MIR*1534, *MIR*166, *MIR*168, *MIR*2118, *MIR*2218, *MIR*2630, *MIR*2680, *MIR*3627, *MIR*393, *MIR*394, *MIR*414, *MIR*4376, *MIR*4414, *MIR*472, *MIR*5205, *MIR*5238, *MIR*529, *MIR*530, *MIR*535, *MIR*7122, *MIR*827, *MIR*847, *MIR*862, *MIR*865, *MIR*902 |
| **Malvids- *Eucalyptus grandis*** | *MIR*1028 | *MIR*1128, *MIR*156, *MIR*160, *MIR*162, *MIR*164, *MIR*168, *MIR*170, *MIR*171, *MIR*172, *MIR*2111, *MIR*319, *MIR*390, *MIR*391, *MIR*395, *MIR*396, *MIR*397, *MIR*403, *MIR*408, *MIR*5021, *MIR*5161, *MIR*5234 |
| **Malvids-Brassica** | *MIR*157, *MIR*1885, *MIR*824, *MIR*9408 | *MIR*169, *MIR*2673, *MIR*399, *MIR*473, *MIR*477, *MIR*482, *MIR*828 |
| **Brassica- *Brassica rapa*** | *MIR*1140, *MIR*158, *MIR*161, *MIR*4340, *MIR*4374, *MIR*5654, *MIR*5711, *MIR*5712, *MIR*5713, *MIR*5714, *MIR*5715, *MIR*5716, *MIR*5717, *MIR*5718, *MIR*5719, *MIR*5720, *MIR*5721, *MIR*5722, *MIR*5723, *MIR*5724, *MIR*5725, *MIR*5726, *MIR*6032, *MIR*9552, *MIR*9553, *MIR*9554, *MIR*9555, *MIR*9556, *MIR*9557, *MIR*9558, *MIR*9559, *MIR*9560, *MIR*9561, *MIR*9562, *MIR*9563, *MIR*9564, *MIR*9565, *MIR*9566, *MIR*9567, *MIR*9568, *MIR*9569 | *MIR*1128, *MIR*170, *MIR*408, *MIR*4370 |
| **Brassica- *Brassica oleracea*** | *MIR*1115, *MIR*1128, *MIR*773, *MIR*9409, *MIR*9410, *MIR*9411 | *MIR*156, *MIR*162, *MIR*164, *MIR*167, *MIR*168, *MIR*2111, *MIR*319, *MIR*390, *MIR*391, *MIR*395, *MIR*396, *MIR*403, *MIR*408, *MIR*5658 |
| **Eurosids-Fabids** | *MIR*1511, *MIR*5225, *MIR*5232, *MIR*5369 | - |
| **Fabids-Maloideae** | *MIR*7125, *MIR*827 | *MIR*1023, *MIR*1046, *MIR*1127, *MIR*1128, *MIR*1436, *MIR*1439, *MIR*1533, *MIR*1534, *MIR*156, *MIR*162, *MIR*2218, *MIR*2630, *MIR*2673, *MIR*2680, *MIR*3636, *MIR*4376, *MIR*4414, *MIR*472, *MIR*5205, *MIR*5658, *MIR*828, *MIR*838, *MIR*847, *MIR*854 |
| **Maloideae- *Malus domestica*** | *MIR*7120, *MIR*7121, *MIR*7123, *MIR*7124, *MIR*7126, *MIR*7127, *MIR*7128, *MIR*837 | *MIR*5142, *MIR*5238, *MIR*530 |
| **Maloideae*- Prunus persica*** | *MIR*5016, *MIR*6257, *MIR*6258, *MIR*6259, *MIR*6260, *MIR*6261, *MIR*6262, *MIR*6263, *MIR*6264, *MIR*6265, *MIR*6266, *MIR*6267, *MIR*6269, *MIR*6270, *MIR*6271, *MIR*6272, *MIR*6273, *MIR*6274,*MIR*6275, *MIR*6276, *MIR*6277, *MIR*6278, *MIR*6279, *MIR*6280, *MIR*6281, *MIR*6282, *MIR*6283, *MIR*6284, *MIR*6285, *MIR*6286, *MIR*6287, *MIR*6288, *MIR*6289, *MIR*6290, *MIR*6291, *MIR*6292, *MIR*6293, *MIR*6294, *MIR*6295, *MIR*6296, *MIR*6297, *MIR*8122, *MIR*8123, *MIR*8124, *MIR*8125, *MIR*8126, *MIR*8127, *MIR*8128, *MIR*8129, *MIR*8130, *MIR*8131, *MIR*8132, *MIR*8133 | *MIR*2118, *MIR*391, *MIR*473, *MIR*5369, *MIR*838 |
| **Fabids-Papilionoideae** | *MIR*1507, *MIR*1509, *MIR*1510, *MIR*1514, *MIR*1525, *MIR*2089, *MIR*2119, *MIR*2596, *MIR*2606, *MIR*5037, *MIR*5139, *MIR*5142, *MIR*5281, *MIR*5377 | *MIR*3627, *MIR*4346, *MIR*473, *MIR*477, *MIR*535, *MIR*7122, *MIR*827 |
| **Papilionoideae- *Glycine* max** | *MIR*1039, *MIR*1095, *MIR*1134, *MIR*1508, *MIR*1512, *MIR*1513, *MIR*1515, *MIR*1516, *MIR*1517, *MIR*1518, *MIR*1519, *MIR*1520, *MIR*1521, *MIR*1523, *MIR*1524, *MIR*1526, *MIR*1532, *MIR*1535, *MIR*165, *MIR*2107, *MIR*2108, *MIR*2109, *MIR*3522, *MIR*3979, *MIR*403, *MIR*4340, *MIR*4341, *MIR*4342, *MIR*4343, *MIR*4344, *MIR*4345, *MIR*4346, *MIR*4347, *MIR*4348, *MIR*4349, *MIR*4350, *MIR*4351, *MIR*4352, *MIR*4353, *MIR*4354, *MIR*4355, *MIR*4356, *MIR*4357, *MIR*4358, *MIR*4359, *MIR*4360, *MIR*4361, *MIR*4362, *MIR*4363, *MIR*4364, *MIR*4365, *MIR*4366, *MIR*4367, *MIR*4368, *MIR*4369, *MIR*4370, *MIR*4371, *MIR*4372, *MIR*4373, *MIR*4374, *MIR*4375, *MIR*4377, *MIR*4378, *MIR*4379, *MIR*4380, *MIR*4381, *MIR*4382, *MIR*4383, *MIR*4384, *MIR*4385, *MIR*4386, *MIR*4387, *MIR*4388, *MIR*4389, *MIR*4390, *MIR*4391, *MIR*4392, *MIR*4393, *MIR*4394, *MIR*4395, *MIR*4396, *MIR*4397, *MIR*4398, *MIR*4399, *MIR*4400, *MIR*4401, *MIR*4402, *MIR*4403, *MIR*4404, *MIR*4405, *MIR*4406, *MIR*4407, *MIR*4408, *MIR*4409, *MIR*4410, *MIR*4411, *MIR*4412, *MIR*4413, *MIR*4415, *MIR*4992, *MIR*4993, *MIR*4994, *MIR*4995, *MIR*4996, *MIR*4997, *MIR*4998, *MIR*5014, *MIR*5030, *MIR*5031, *MIR*5032, *MIR*5033, *MIR*5034, *MIR*5035, *MIR*5036, *MIR*5038, *MIR*5039, *MIR*5040, *MIR*5041, *MIR*5042, *MIR*5043, *MIR*5044, *MIR*5368, *MIR*5370, *MIR*5371, *MIR*5372, *MIR*5373, *MIR*5374, *MIR*5375, *MIR*5376, *MIR*5377, *MIR*5378, *MIR*5379, *MIR*5380, *MIR*5382, *MIR*5565, *MIR*5667, *MIR*5668, *MIR*5669, *MIR*5670, *MIR*5671, *MIR*5672, *MIR*5673, *MIR*5674, *MIR*5675, *MIR*5676, *MIR*5677, *MIR*5678, *MIR*5679, *MIR*5761, *MIR*5762, *MIR*5763, *MIR*5764, *MIR*5765, *MIR*5766, *MIR*5767, *MIR*5768, *MIR*5769, *MIR*5770, *MIR*5771, *MIR*5772, *MIR*5773, *MIR*5774, *MIR*5775, *MIR*5776, *MIR*5777, *MIR*5778, *MIR*5779, *MIR*5780, *MIR*5781, *MIR*5782, *MIR*5783, *MIR*5784, *MIR*5785, *MIR*5786, *MIR*6299, *MIR*6300, *MIR*854, *MIR*9722, *MIR*9723, *MIR*9724, *MIR*9725, *MIR*9726, *MIR*9727, *MIR*9728, *MIR*9729, *MIR*9730, *MIR*9731, *MIR*9732, *MIR*9733, *MIR*9734, *MIR*9735, *MIR*9736, *MIR*9737, *MIR*9738, *MIR*9739, *MIR*9740, *MIR*9741, *MIR*9742, *MIR*9743, *MIR*9744, *MIR*9745, *MIR*9746, *MIR*9747, *MIR*9748, *MIR*9749, *MIR*9750, *MIR*9751, *MIR*9752, *MIR*9753, *MIR*9754, *MIR*9755, *MIR*9756, *MIR*9757, *MIR*9758, *MIR*9759, *MIR*9760, *MIR*9761, *MIR*9762, *MIR*9763, *MIR*9764, *MIR*9765, *MIR*9766, *MIR*9767 | *MIR*1023, *MIR*1046, *MIR*1127, *MIR*1128, *MIR*1133, *MIR*1436, *MIR*1439, *MIR*2680, *MIR*2919, *MIR*5238 |
| **Papilionoideae- *Medicago truncatula*** | *MIR*1435, *MIR*2086, *MIR*2087, *MIR*2088, *MIR*2199, *MIR*2585, *MIR*2586, *MIR*2587, *MIR*2588, *MIR*2589, *MIR*2590, *MIR*2591, *MIR*2592, *MIR*2593, *MIR*2594, *MIR*2595, *MIR*2596, *MIR*2597, *MIR*2598, *MIR*2599, *MIR*2600, *MIR*2601, *MIR*2602, *MIR*2603, *MIR*2604, *MIR*2605, *MIR*2606, *MIR*2607, *MIR*2608, *MIR*2609, *MIR*2610, *MIR*2611, *MIR*2612, *MIR*2613, *MIR*2614, *MIR*2615, *MIR*2616, *MIR*2617, *MIR*2618, *MIR*2619, *MIR*2620, *MIR*2621, *MIR*2622, *MIR*2623, *MIR*2624, *MIR*2625, *MIR*2626, *MIR*2627, *MIR*2628, *MIR*2629, *MIR*2631, *MIR*2632, *MIR*2633, *MIR*2634, *MIR*2635, *MIR*2636, *MIR*2637, *MIR*2638, *MIR*2639, *MIR*2640, *MIR*2641, *MIR*2642, *MIR*2643, *MIR*2644, *MIR*2645, *MIR*2646, *MIR*2647, *MIR*2648, *MIR*2649, *MIR*2650, *MIR*2651, *MIR*2652, *MIR*2653, *MIR*2654, *MIR*2655, *MIR*2656, *MIR*2657, *MIR*2658, *MIR*2659, *MIR*2660, *MIR*2661, *MIR*2662, *MIR*2663, *MIR*2664, *MIR*2665, *MIR*2666, *MIR*2667, *MIR*2668, *MIR*2669, *MIR*2670, *MIR*2671, *MIR*2672, *MIR*2674, *MIR*2675, *MIR*2676, *MIR*2677, *MIR*2678, *MIR*2679, *MIR*2680, *MIR*2868, *MIR*2919, *MIR*2923, *MIR*2936, *MIR*5014, *MIR*5079, *MIR*5175, *MIR*5204, *MIR*5205, *MIR*5206, *MIR*5207, *MIR*5208, *MIR*5209, *MIR*5210, *MIR*5211, *MIR*5212, *MIR*5213, *MIR*5214, *MIR*5215, *MIR*5216, *MIR*5217, *MIR*5218, *MIR*5219, *MIR*5221, *MIR*5222, *MIR*5223, *MIR*5224, *MIR*5226, *MIR*5227, *MIR*5228, *MIR*5229, *MIR*5230, *MIR*5231, *MIR*5232, *MIR*5233, *MIR*5234, *MIR*5235, *MIR*5236, *MIR*5237, *MIR*5238, *MIR*5239, *MIR*5240, *MIR*5241, *MIR*5242, *MIR*5243, *MIR*5244, *MIR*5245, *MIR*5246, *MIR*5247, *MIR*5248, *MIR*5249, *MIR*5250, *MIR*5251, *MIR*5252, *MIR*5253, *MIR*5254, *MIR*5255, *MIR*5256, *MIR*5257, *MIR*5258, *MIR*5259, *MIR*5260, *MIR*5261, *MIR*5262, *MIR*5263, *MIR*5264, *MIR*5265, *MIR*5266, *MIR*5267, *MIR*5268, *MIR*5269, *MIR*5270, *MIR*5271, *MIR*5272, *MIR*5273, *MIR*5274, *MIR*5275, *MIR*5276, *MIR*5277, *MIR*5278, *MIR*5279, *MIR*5280, *MIR*5281, *MIR*5282, *MIR*5283, *MIR*5284, *MIR*5285, *MIR*5286, *MIR*5287, *MIR*5288, *MIR*5289, *MIR*5290, *MIR*5291, *MIR*5292, *MIR*5293, *MIR*5294, *MIR*5295, *MIR*5296, *MIR*5297, *MIR*5298, *MIR*5299, *MIR*5382, *MIR*5554, *MIR*5555, *MIR*5556, *MIR*5557, *MIR*5558, *MIR*5559, *MIR*5560, *MIR*5561, *MIR*5562, *MIR*5563, *MIR*5740, *MIR*5741, *MIR*5742, *MIR*5743, *MIR*5744, *MIR*5745, *MIR*5746, *MIR*5747, *MIR*5748, *MIR*5749, *MIR*5750, *MIR*5751, *MIR*5752, *MIR*5753, *MIR*5754, *MIR*5755, *MIR*5756, *MIR*5757, *MIR*5758, *MIR*5759, *MIR*5760, *MIR*7696, *MIR*7697, *MIR*7698, *MIR*7699, *MIR*7700, *MIR*7701, *MIR*822, *MIR*8038, *MIR*8048 | *MIR*1088, *MIR*1511, *MIR*1534, *MIR*170, *MIR*1860, *MIR*394, *MIR*403, *MIR*4376, *MIR*5142, *MIR*5369, *MIR*5658, *MIR*8037, *MIR*8041, *MIR*8043, *MIR*8047, *MIR*8049, *MIR*8050 |
| **Liliopsida-BOP clade** | *MIR*1118, *MIR*1120, *MIR*1130, *MIR*1318, *MIR*1320, *MIR*1433, *MIR*1847, *MIR*1868, *MIR*2096, *MIR*2864, *MIR*5057, *MIR*5145, *MIR*5150, *MIR*5158, *MIR*5171, *MIR*5179, *MIR*5203, *MIR*530, *MIR*531, *MIR*818, *MIR*838, *MIR*845 | - |
| **BOP clad*-Oryza sativa*** | *MIR*1044, *MIR*1319, *MIR*1423, *MIR*1424, *MIR*1425, *MIR*1427, *MIR*1428, *MIR*1429, *MIR*1430, *MIR*1431, *MIR*1437, *MIR*1438, *MIR*1440, *MIR*1441, *MIR*1442, *MIR*1846, *MIR*1848, *MIR*1849, *MIR*1850, *MIR*1851, *MIR*1852, *MIR*1853, *MIR*1854, *MIR*1855, *MIR*1856, *MIR*1857, *MIR*1858, *MIR*1859, *MIR*1860, *MIR*1861, *MIR*1862, *MIR*1863, *MIR*1864, *MIR*1865, *MIR*1866, *MIR*1867, *MIR*1868, *MIR*1869, *MIR*1870, *MIR*1871, *MIR*1872, *MIR*1873, *MIR*1874, *MIR*1875, *MIR*1876, *MIR*1877, *MIR*2091, *MIR*2092, *MIR*2093, *MIR*2094, *MIR*2095, *MIR*2097, *MIR*2098, *MIR*2099, *MIR*2100, *MIR*2101, *MIR*2103, *MIR*2104, *MIR*2105, *MIR*2106, *MIR*2120, *MIR*2121, *MIR*2122, *MIR*2123, *MIR*2595, *MIR*2662, *MIR*2863, *MIR*2865, *MIR*2866, *MIR*2867, *MIR*2868, *MIR*2869, *MIR*2870, *MIR*2871, *MIR*2872, *MIR*2873, *MIR*2874, *MIR*2875, *MIR*2876, *MIR*2877, *MIR*2878, *MIR*2879, *MIR*2880, *MIR*2905, *MIR*2907, *MIR*2918, *MIR*2920, *MIR*2921, *MIR*2922, *MIR*2923, *MIR*2924, *MIR*2926, *MIR*2927, *MIR*2929, *MIR*2930, *MIR*2931, *MIR*2932, *MIR*3980, *MIR*3981, *MIR*413, *MIR*415, *MIR*416, *MIR*417, *MIR*418, *MIR*419, *MIR*420, *MIR*426, *MIR*435, *MIR*438, *MIR*439, *MIR*440, *MIR*441, *MIR*443, *MIR*446, *MIR*479, *MIR*5071, *MIR*5072, *MIR*5073, *MIR*5074, *MIR*5076, *MIR*5077, *MIR*5078, *MIR*5079, *MIR*5080, *MIR*5081, *MIR*5082, *MIR*5083, *MIR*5143, *MIR*5144, *MIR*5146, *MIR*5147, *MIR*5148, *MIR*5149, *MIR*5150, *MIR*5152, *MIR*5153, *MIR*5154, *MIR*5155, *MIR*5156, *MIR*5157, *MIR*5158, *MIR*5160, *MIR*5162, *MIR*5337, *MIR*5338, *MIR*5339, *MIR*5340, *MIR*535, *MIR*5484, *MIR*5485, *MIR*5486, *MIR*5487, *MIR*5488, *MIR*5489, *MIR*5490, *MIR*5491, *MIR*5544, *MIR*5788, *MIR*5789, *MIR*5790, *MIR*5791, *MIR*5792, *MIR*5793, *MIR*5794, *MIR*5795, *MIR*5796, *MIR*5797, *MIR*5798, *MIR*5799, *MIR*5800, *MIR*5801, *MIR*5802, *MIR*5803, *MIR*5804, *MIR*5805, *MIR*5806, *MIR*5807, *MIR*5808, *MIR*5809, *MIR*5810, *MIR*5811, *MIR*5812, *MIR*5813, *MIR*5814, *MIR*5815, *MIR*5816, *MIR*5817, *MIR*5818, *MIR*5819, *MIR*5820, *MIR*5821, *MIR*5822, *MIR*5823, *MIR*5824, *MIR*5825, *MIR*5826, *MIR*5827, *MIR*5828, *MIR*5829, *MIR*5830, *MIR*5831, *MIR*5832, *MIR*5833, *MIR*5834, *MIR*5835, *MIR*5836, *MIR*5837, *MIR*6245, *MIR*6246, *MIR*6247, *MIR*6248, *MIR*6249, *MIR*6250, *MIR*6251, *MIR*6252, *MIR*6253, *MIR*6254, *MIR*6255, *MIR*6256, *MIR*7692, *MIR*7693, *MIR*7694, *MIR*7695, *MIR*806, *MIR*808, *MIR*809, *MIR*810, *MIR*812, *MIR*813, *MIR*814, *MIR*816, *MIR*817, *MIR*841 | *MIR*5067, *MIR*5381, *MIR*5384, *MIR*5565, *MIR*5658, *MIR*854 |
| **BOP clade-Pooideae** | *MIR*1122, *MIR*1134, *MIR*1135, *MIR*1139, *MIR*5048, *MIR*5062, *MIR*5064, *MIR*5070, *MIR*5164, *MIR*5170, *MIR*5171, *MIR*5173, *MIR*5200, *MIR*5281, *MIR*7757 | *MIR*1426, *MIR*1522, *MIR*2102, *MIR*2925, *MIR*414, *MIR*442, *MIR*445, *MIR*4993, *MIR*5075, *MIR*5382, *MIR*5386, *MIR*5543, *MIR*5567, *MIR*815, *MIR*821, *MIR*847 |
| **Pooideae-Triticoidae** | *MIR*1117, *MIR*1126, *MIR*1131, *MIR*5048, *MIR*5050, *MIR*6197, *MIR*6201 | *MIR*162, *MIR*172, *MIR*1878, *MIR*2864, *MIR*390, *MIR*393, *MIR*394, *MIR*5057, *MIR*5159, *MIR*5179, *MIR*528, *MIR*529, *MIR*5658, *MIR*827, *MIR*845 |
| **Triticoidae*-Hordeum vulgare*** | *MIR*4227, *MIR*5051, *MIR*5052, *MIR*5053, *MIR*6176, *MIR*6177, *MIR*6178, *MIR*6179, *MIR*6180, *MIR*6181, *MIR*6182, *MIR*6183, *MIR*6184, *MIR*6185, *MIR*6186, *MIR*6187, *MIR*6188, *MIR*6189, *MIR*6190, *MIR*6191, *MIR*6192, *MIR*6193, *MIR*6194, *MIR*6195, *MIR*6196, *MIR*6198, *MIR*6199, *MIR*6200, *MIR*6202, *MIR*6203, *MIR*6204, *MIR*6205, *MIR*6206, *MIR*6207, *MIR*6208, *MIR*6209, *MIR*6210, *MIR*6211, *MIR*6212, *MIR*6213, *MIR*6214 | *MIR*1134, *MIR*1139, *MIR*1433, *MIR*1435, *MIR*164, *MIR*1847, *MIR*2275, *MIR*395, *MIR*396, *MIR*398, *MIR*417, *MIR*5060, *MIR*5062, *MIR*5064, *MIR*5164, *MIR*5183, *MIR*5200, *MIR*5281, *MIR*531, *MIR*5384, *MIR*7757, *MIR*837, *MIR*838, *MIR*854 |
| **Tritichoidae-*Triticum aestivum*** | *MIR*1058, *MIR*1118, *MIR*1120, *MIR*1123, *MIR*1124, *MIR*1125, *MIR*1128, *MIR*1130, *MIR*1133, *MIR*1136, *MIR*2102, *MIR*4825, *MIR*5084, *MIR*5085, *MIR*5086, *MIR*5200, *MIR*5570, *MIR*9652, *MIR*9653, *MIR*9654, *MIR*9655, *MIR*9656, *MIR*9657, *MIR*9658, *MIR*9659, *MIR*9660, *MIR*9661, *MIR*9662, *MIR*9663, *MIR*9664, *MIR*9665, *MIR*9666, *MIR*9667, *MIR*9668, *MIR*9669, *MIR*9670, *MIR*9671, *MIR*9672, *MIR*9673, *MIR*9674, *MIR*9675, *MIR*9676, *MIR*9677, *MIR*9678, *MIR*9679, *MIR*9772, *MIR*9773, *MIR*9774, *MIR*9775, *MIR*9776, *MIR*9777, *MIR*9778, *MIR*9779, *MIR*9780, *MIR*9781, *MIR*9782, *MIR*9783 | *MIR*1137, *MIR*1432, *MIR*1533, *MIR*2096, *MIR*2103, *MIR*2928, *MIR*3979, *MIR*5070, *MIR*5145, *MIR*5151, *MIR*5381, *MIR*5565 |
| **Pooideae-*Brachypodium distachyon*** | *MIR*3948, *MIR*5054, *MIR*5055, *MIR*5056, *MIR*5058, *MIR*5059, *MIR*5061, *MIR*5063, *MIR*5065, *MIR*5066, *MIR*5068, *MIR*5069, *MIR*5163, *MIR*5165, *MIR*5166, *MIR*5167, *MIR*5170, *MIR*5171, *MIR*5172, *MIR*5173, *MIR*5174, *MIR*5177, *MIR*5178, *MIR*5182, *MIR*5184, *MIR*5185, *MIR*5198, *MIR*5199, *MIR*5201, *MIR*5202, *MIR*7707, *MIR*7708, *MIR*7709, *MIR*7710, *MIR*7711, *MIR*7712, *MIR*7713, *MIR*7714, *MIR*7715, *MIR*7716, *MIR*7717, *MIR*7718, *MIR*7719, *MIR*7720, *MIR*7721, *MIR*7722, *MIR*7723, *MIR*7724, *MIR*7725, *MIR*7726, *MIR*7727, *MIR*7728, *MIR*7729, *MIR*7730, *MIR*7731, *MIR*7732, *MIR*7733, *MIR*7734, *MIR*7735, *MIR*7736, *MIR*7737, *MIR*7738, *MIR*7739, *MIR*7740, *MIR*7741, *MIR*7742, *MIR*7743, *MIR*7744, *MIR*7745, *MIR*7746, *MIR*7747, *MIR*7748, *MIR*7749, *MIR*7750, *MIR*7751, *MIR*7752, *MIR*7753, *MIR*7754, *MIR*7755, *MIR*7756, *MIR*7758, *MIR*7759, *MIR*7760, *MIR*7761, *MIR*7762, *MIR*7763, *MIR*7764, *MIR*7765, *MIR*7766, *MIR*7767, *MIR*7768, *MIR*7769, *MIR*7770, *MIR*7771, *MIR*7772, *MIR*7773, *MIR*7774, *MIR*7775, *MIR*7776, *MIR*7777, *MIR*7778, *MIR*7779, *MIR*7780, *MIR*7781, *MIR*7782, *MIR*7783, *MIR*7784, *MIR*7785, *MIR*7786, *MIR*7787, *MIR*9480, *MIR*9481, *MIR*9482, *MIR*9483, *MIR*9484, *MIR*9485, *MIR*9486, *MIR*9487, *MIR*9488, *MIR*9489, *MIR*9490, *MIR*9491, *MIR*9492, *MIR*9493, *MIR*9494, *MIR*9495, *MIR*9496, *MIR*9497, *MIR*9498, *MIR*9499 | *MIR*1118, *MIR*1120, *MIR*1130, *MIR*1161, *MIR*1320, *MIR*1433, *MIR*1847, *MIR*2096, *MIR*2673, *MIR*2928, *MIR*3979, *MIR*482, *MIR*5021, *MIR*5198, *MIR*5205, *MIR*5381, *MIR*5384, *MIR*5565, *MIR*818, *MIR*837, *MIR*838, *MIR*854 |
| **Liliopsida-Panicoideae** | *MIR*165, *MIR*5568, | - |
| **Panicoideae-Andropogoneae** | - | *MIR*1132, *MIR*2102, *MIR*2928, *MIR*442, *MIR*445, *MIR*5075, *MIR*5543, *MIR*815, *MIR*847 |
| **Andropogoneae - *Zea mays*** | *MIR*1514, *MIR*2630, *MIR*3436, *MIR*5185 | *MIR*1128, *MIR*1426, *MIR*1435, *MIR*437, *MIR*5021, *MIR*5381, *MIR*5386, *MIR*5567, *MIR*821, *MIR*854 |
| **Andropogoneae- *Sorghum bicolor*** | *MIR*1023, *MIR*4342, *MIR*5383, *MIR*5385, *MIR*5387, *MIR*5388, *MIR*5389, *MIR*5564, *MIR*5566, *MIR*5569, *MIR*5570, *MIR*6217, *MIR*6218, *MIR*6219, *MIR*6220, *MIR*6221, *MIR*6222, *MIR*6223, *MIR*6224, *MIR*6225, *MIR*6226, *MIR*6227, *MIR*6228, *MIR*6229, *MIR*6230, *MIR*6231, *MIR*6232, *MIR*6233, *MIR*6234, *MIR*6235 | *MIR*1133, *MIR*1439, *MIR*1522, *MIR*165, *MIR*2275, *MIR*2673, *MIR*2919, *MIR*2925, *MIR*3979, *MIR*414, *MIR*482, *MIR*5059, *MIR*5067, *MIR*5161, *MIR*5658, *MIR*827, *MIR*837 |
| **Panicoideae-Paniceae** | - | *MIR*1426, *MIR*1432, *MIR*1522, *MIR*162, *MIR*164, *MIR*168, *MIR*171, *MIR*172, *MIR*2118, *MIR*2275, *MIR*2673, *MIR*2925, *MIR*393, *MIR*394, *MIR*395, *MIR*397, *MIR*398, *MIR*408, *MIR*4993, *MIR*5060, *MIR*5067, *MIR*528, *MIR*5381, *MIR*5386, *MIR*5565, *MIR*5567, *MIR*5658, *MIR*5806, *MIR*5808, *MIR*5813 |
| **Paniceae- *Setaria italica*** | - | *MIR*1132, *MIR*1435, *MIR*156, *MIR*159, *MIR*160, *MIR*165, *MIR*166, *MIR*167, *MIR*171, *MIR*2102, *MIR*2919, *MIR*2928, *MIR*319, *MIR*390, *MIR*396, *MIR*399, *MIR*414, *MIR*437, *MIR*442, *MIR*444, *MIR*482, *MIR*5021, *MIR*5070, *MIR*5169, *MIR*5205, *MIR*5281, *MIR*5384, *MIR*5543, *MIR*815, *MIR*827, *MIR*847 |
| **Paniceae*- Panicum virgature*** | *MIR*1449, *MIR*1507, *MIR*1533, *MIR*9484, *MIR*9488 | *MIR*445, *MIR*5180 |
