# Supplementary material for: Investigation on the Conserved MicroRNA Genes in Higher Plants
Source: Springer Nature journal article supplement (doi:10.1007/s11105-020-01228-9), 2020-06-15
Supplement: 11105_2020_1228_MOESM9_ESM.docx [file 11105_2020_1228_MOESM9_ESM.docx]

| **Supplementary S9**: *MIR* families’ gains and losses throughout the Liliopsida plant species and their likely ancestor(s) based on Dollo maximum parsimony analysis. | | |
| --- | --- | --- |
| **Phylogenetic lineage** | ***MIR* family gains** | ***MIR* family lost** |
| **Root to node 1** | mir1127, mir1128, mir1133, mir1436, mir1438, mir445, mir5161,mir5175, mir5382, mir5568 | - |
| ***Setaria italica*** | - | - |
| **node 1 to node 2** | mir1132, mir1435, mir156, mir159, mir160, mir165, mir166, mir167,mir169, mir2102, mir2919, mir319, mir390, mir396, mir3979, mir399,mir414, mir437, mir442, mir444, mir482, mir5021, mir5075, mir5169,mir5205, mir529, mir5384, mir5543, mir815, mir827, mir845 | - |
| **node 2 to node 4** | mir1426, mir1432, mir1522, mir162, mir164, mir168, mir171, mir172,mir2118, mir2275, mir2673, mir2925, mir393, mir394, mir395, mir397,mir398, mir408, mir4993, mir5060, mir5067, mir528, mir5381, mir5386,mir5565, mir5567, mir5658 | - |
| **node 4 to node 5** | - | mir1132, mir2102, mir2928, mir442, mir445, mir5075, mir5543, mir6249, mir847 |
| ***Zea mays*** | mir1514, mir2630, mir3436, mir4249 | mir1128, mir1426, mir1435, mir437, mir5021, mir5381, mir5386, mir5567, mir821, mir854, |
| ***Sorghum bicolor*** | mir1023, mir4342, mir5383, mir5385, mir5387, mir5388, mir5389,mir5564, mir5566, mir5569, mir5570, mir6217, mir6218, mir6219,mir6220, mir6221, mir6222, mir6223, mir6224, mir6225, mir6226,mir6227, mir6228, mir6229, mir6230, mir6231, mir6232, mir6233,mir6234, mir6235 | mir1133, mir1439, mir1522, mir165, mir2275, mir2673, mir2919, mir2925, mir3979, mir414, mir5054, mir5060, mir5067, mir5161, mir5175, mir5658, mir827, mir837 |
| **node 4 to node 7** | mir1118, mir1120, mir1130, mir1137, mir1139, mir1433, mir1847,mir1878, mir2096, mir2864, mir5057, mir5145, mir5150, mir5159,mir5171, mir5179, mir5203, mir530, mir531, mir818, mir838, mir845 | mir5568, mir165, |
| ***Oryza sativa*** | mir1044, mir1319, mir1423, mir1424, mir1425, mir1426, mir1431, mir1437, mir1438, mir1440, mir1441, mir1442, mir1846, mir1847,mir1848, mir1849, mir1850, mir1851, mir1852, mir1853, mir1854,mir1855, mir1856, mir1857, mir1858, mir1859, mir1860, mir1861,mir1862, mir1863, mir1864, mir1865, mir1866, mir1867, mir1868,mir1869, mir1870, mir1871, mir1872, mir1873, mir1874, mir1875,mir1876, mir1877, mir1879, mir2097, mir2101, mir2103, mir2106,mir2120, mir2121, mir2122, mir2123, mir2218, ir2595, mir2662,mir2863, mir2865, mir2918, mir2920, mir2921, mir2922, mir2923,mir2924, mir2925, mir2926, mir2929, mir2930, mir2931, mir2932,mir3980, mir3981, mir3982, mir399i, mir408, mir415, mir416, mir417,mir418, mir419, mir420, mir426, mir435, mir438, mir439, mir440,mir441, mir442, mir446, mir477, mir479, mir5071, mir5072, mir5073,mir5074, mir5076, mir5077, mir5078, mir5079, mir5080, mir5081,mir5082, mir5083, mir5143, mir5144, mir5146, mir5147, mir5148,mir5149, mir5150, mir5152, mir5153, mir5154, mir5155, mir5156,mir5157, mir5158, mir5160, mir5162, mir5337, mir535, mir5484,mir5485, mir5486, mir5487, mir5488, mir5489, mir5490, mir5491,mir5492, mir5493, mir5494, mir5495, mir5496, mir5497, mir5498,mir5499, mir5500, mir5501, mir5502, mir5503, mir5504, mir5505,mir5506, mir5507, mir5508, mir5509, mir5510, mir5511, mir5512,mir5513, mir5514, mir5515, mir5516, mir5517, mir5518, mir5519,mir5521, mir5522, mir5523, mir5524, mir5525, mir5526, mir5527,mir5528, mir5529, mir5530, mir5531, mir5532, mir5533, mir5534,mir5535, mir5536, mir5537, mir5538, mir5539, mir5540, mir5541,mir5542, mir5544, mir5788, mir5789, mir5790, mir5791, mir5792,mir5793, mir5794, mir5795, mir5796, mir5797, mir5798, mir5799,  mir5800, mir5801, mir5802, mir5803, mir5804, mir5805, mir5806,mir5807, mir5808, mir5809, mir5810, mir5811, mir5812, mir5813,mir5814, mir5815, mir5816, mir5817, mir5818, mir5819, mir5820,mir5821, mir5822, mir5823, mir5824, mir5825, mir5826, mir5827,mir5828, mir5829, mir5830, mir5831, mir5832, mir5833, mir5834,mir5835, mir5836, mir5837, mir6245, mir6246, mir6247, mir6248,mir6249, mir6250, mir6251, mir6252, mir6253, mir6254, mir6255,mir6256, mir7692, mir7693, mir7694, mir7695, mir806, mir808, mir809,mir810, mir812, mir813, mir814, mir816, mir817, mir819, mir820 | mir5067, mir528, mir5384, mir5565, mir5658, mir827 |
| **node 7 to node 3** | mir1122, mir1134, mir1135, mir1139, mir5048, mir5062, mir5064,mir5070, mir5164, mir5180, mir5181, mir5182, mir5200, mir5281,mir7757 | mir1426, mir1522, mir2102, mir2925, mir414, mir442, mir445, mir4993, mir5075, mir5382, mir5386, mir5543, mir5567, mir815, mir821, mir847, |
| ***Brachypodium distachyon*** | mir3948, mir5054, mir5056, mir5058, mir5059, mir5061, mir5063,mir5065, mir5066, mir5068, mir5069, mir5163, mir5165, mir5166,mir5167, mir5170, mir5172, mir5173, mir5174, mir5176, mir5177,mir5178, mir5182, mir5184, mir5185, mir5198, mir5199, mir5201,mir5202, mir5565, mir7737, mir7738, mir7739, mir7740, mir7741,mir7742, mir7743, mir7744, mir7745, mir7746, mir7747, mir7748,mir7749, mir7750, mir7751, mir7752, mir7753, mir7754, mir7755,mir7756, mir7758, mir7759, mir7760, mir7761, mir7762, mir7763,mir7764, mir7765, mir7766, mir7767, mir7768, mir7769, mir7770,mir7771, mir7772, mir7773, mir7774, mir7775, mir7776, mir7777,  mir7778, mir7779, mir7780, mir7781, mir7782, mir7783, mir7784,mir7785, mir7786, mir7787, mir902, mir9480, mir9481, mir9482,mir9483, mir9484, mir9485, mir9486, mir9487, mir9488, mir9489,mir9490, mir9491, mir9492, mir9493, mir9494, mir9495, mir9496,mir9497, mir9498, mir9499, mir9652, mir9653, mir9654, mir9655,mir965 | mir1118, mir1120, mir1130, mir1318, mir1320, mir1433, mir2096, mir2673, mir2928, mir3979, mir482, mir5021, mir5079, mir5085, mir5381, mir5384, mir837, mir838, mir854, |
| **node 3 to node 6** | mir1117, mir1126, mir1136, mir1137, mir5048, mir5050, mir6197,mir6201 | mir162, mir172, mir1878, mir2864, mir390, mir393, mir394, mir5057, mir5159, mir5179, mir528, mir529, mir5658, mir812, mir815 |
| ***Hordeum vulgare*** | mir1147, mir5061, mir5062, mir5063, mir6176, mir6177, mir6178,mir6179, mir6180, mir6181, mir6182, mir6183, mir6184, mir6185,mir6186, mir6187, mir6188, mir6189, mir6190, mir6191, mir6192,mir6193, mir6194, mir6195, mir6196, mir6198, mir6199, mir6200,mir6202, mir6203, mir6204, mir902 | mir1134, mir1139, mir1433, mir1435, mir164, mir1847, mir2275, mir395, mir396, mir398, mir408, mir5060, mir5062, mir5064, mir5164, mir5183, mir5200, mir5281, mir531, mir5384, mir7757, mir837, mir838, mir854 |
| ***Triticum aestivum*** | mir1058, mir1118, mir1120, mir1123, mir1124, mir1125, mir1129,mir1131, mir1138, mir1318, mir2108, mir4825, mir5084, mir5085,mir5086, mir5261, mir5645, mir9652, mir9653, mir9654, mir9655,mir9656, mir9657, mir9658, mir9659, mir9660, mir9661, mir9662,mir9663, mir9664, mir9665, mir9666, mir9667, mir9668, mir9669,mir9670, mir9671, mir9672, mir9673, mir9674, mir9675, mir9676,mir9677, mir9678, mir9679, mir9772, mir9773, mir9774, mir9775,mir9776, mir9777, mir9778, mir9779, mir9780, mir9781, mir9782,mir9783 | mir1319, mir1432, mir168, mir2096, mir2118, mir2928, mir2932, mir5070, mir5145, mir5151, mir5381, mir5565 |
| ***panicum virgature*** | mir1449, mir1507, mir1533, mir157, mir841, mir855 | mir445, mir5175 |
