# Supplementary material for: Investigation on the Conserved MicroRNA Genes in Higher Plants
Source: Springer Nature journal article supplement (doi:10.1007/s11105-020-01228-9), 2020-06-15
Supplement: 11105_2020_1228_MOESM10_ESM.docx [file 11105_2020_1228_MOESM10_ESM.docx]

| **Supplementary S10:** *MIR* families’ gains and losses throughout the Eudicotyledons plant species and their likely ancestor(s) based on Dollo maximum parsimony analysis. | | |
| --- | --- | --- |
| **Phylogenetic lineage** | ***MIR* family gains** | ***MIR* family lost** |
| **Root to node1** | miR167,miR169,miR2673,miR2919,miR398,miR399,miR473,miR477,miR482,miR828,miR838 | - |
| ***Eucalyptus grandis*** | miR1028, miR5161 | - |
| **node 3 to node 4** | miR1128,miR168,miR171,miR2086,miR2087,miR2088,miR2095,miR397,miR5016,miR824,miR9408 | - |
| ***Brassica oleacea*** | miR1115, miR1309, miR773, miR9408, miR9409, miR9410 | miR167, miR169, miR2673, miR399, miR473, miR477, miR482, miR828 |
| **node 4 to node 5** | miR1536, miR159, miR162, miR164, miR167, miR2111, miR390, miR391, miR395, miR396, miR403, miR408, miR5658 | - |
| ***Brassica rapa*** | miR1140, miR158, miR161, miR2936, miR400, miR5654, miR5711, miR5712, miR5713, miR5714, miR5715, miR5716, miR5717, miR5718, miR5719, miR5720, miR5721, miR5722, miR5723, miR5724, miR5725, miR5726, miR8018, miR860, miR9552, miR9553, miR9554, miR9555, miR9556, miR9557, miR9558, miR9559, miR9560, miR9561, miR9562, miR9563, miR9564, miR9565, miR9566, miR9567, miR9568, miR9569 | miR1128, miR169, miR170, miR2673, miR2919, miR397, miR399, miR473, miR477, miR482, miR828, |
| **node 5 to node 8** | miR1088, miR1511, miR1916, miR2118, miR3627, miR393, miR394, miR5142, miR5225, miR5238, miR529, miR530, miR535, miR5369, miR7121, miR827 | miR9408, miR824, miR2095, miR168 |
| **node 8 to node 9** | miR7125, miR858 | miR1128, miR170, miR2593, miR5658 |
| ***Malus domestica*** | miR7120, miR7121, miR7123, miR7124, miR7126, miR7127, miR7128, miR837 | miR5142, miR5238, miR530 |
| ***Prunus persica*** | miR5016, miR6257, miR6258, miR6259, miR6260, miR6261, miR6262, ir6263, miR6264, miR6265, miR6266, miR6267, miR6269, miR6270, miR6271, ir6272, miR6273, miR6274, miR6275, miR6276, miR6277, miR6278, miR6279, ir6280, miR6281, miR6282, miR6283, miR6284, miR6285, miR6286, miR6287, ir6288, miR6289, miR6290, miR6291, miR6292, miR6293, miR6294, miR6295, ir6296, miR6297, miR6299, miR6300, miR7120, miR7121, miR7122, miR7123, ir7124, miR7125, miR7126, miR7127, miR7128, miR7696, miR7697, miR7698, ir7699, miR7700, miR7701, miR773, miR780, miR7979, miR7980, miR7981, miR7982, miR7983, miR7984, miR7985, miR7986, miR7987, miR7988, miR7989, ir7990, miR7991, miR7992, miR7993, miR7994, miR7995, miR7996, miR7997, ir7998, miR7999, miR8122, miR8133 | miR2118, miR391, miR473, miR5369, miR838 |
| **node 8 to node 2** | miR865, miR862, miR479, miR472, miR414, miR2630, miR1533, miR1127, miR1023 | miR391,miR473 |
| ***Vitis vinifere*** | miR1160, miR2950, miR3623, miR3624, miR3625, miR3626, miR3628, ir3629, miR3630, miR3631, miR3632, miR3633, miR3634, miR3635, miR3636, ir3637, miR3638, miR3639, miR3640, miR5139, miR811, miR845 | miR838, miR7121, miR5369, miR530, miR5225, miR5142, miR2673, miR1511, miR1128, miR1088, |
| **node to node 6** | miR1046, miR1133, miR1436, miR1439, miR1533, miR1860, miR2218, ir2680, miR4376, miR4413, miR5205, miR847, miR902 | miR535 |
| **node 6 to node 7** | miR1507, miR1509, miR1510, miR1514, miR1535, miR2119, miR2596, ir2606, miR5037, miR5140, miR5161, miR5281, miR5559 | miR827, miR7121, miR477, miR479, miR3627 |
| ***Glycine max*** | miR1039, miR1095, miR1134, miR1508, miR1512, miR1513, miR1515, ir1516, miR1517, miR1518, miR1519, miR1520, miR1521, miR1522, miR1523, ir1524, miR1526, miR1527, miR1528, miR1529, miR1530, miR1531, miR1532, ir1535, miR1536, miR165, miR2107, miR2108, miR2109, miR2275, miR3522, miR3979, miR407, miR4340, miR4341, miR4342, miR4343, miR4344, miR4345, miR4346, miR4347, miR4348, miR4349, miR4350, miR4351, miR4352, miR4353, ir4354, miR4355, miR4356, miR4357, miR4358, miR4359, miR4360, ir4361, miR4362, miR4363, miR4364, miR4365, miR4366, miR4367, miR4368, miR4369, miR4370, miR4371, miR4372, miR4373, miR4374, miR4375, miR4376, miR4377, miR4378, miR4379, miR4380, miR4381, miR4382, miR4383, miR4384, miR4385, miR4386, miR4387, miR4388, miR4389, miR4390, miR4391, miR4392, miR4393, miR4394, miR4395, miR4396, miR4397, miR4398, miR4399, miR4400, miR4401, miR4402, miR4403, miR4404, miR4405, miR4406, miR4407, miR4408, miR4409, miR4410, miR4411, miR4412, miR4413, miR4415, miR4416, miR4992, miR4993, miR4994, miR4995, miR4996, miR4997, miR4998, miR5015, miR5030, miR5031, miR5032, miR5033, miR5034, miR5035, miR5036, miR5038, miR5039, miR5040, miR5041, miR5042, miR5043, miR5044, miR5368, miR5370, miR5371, miR5372, miR5373, miR5374, miR5375, miR5376, miR5377, miR5378, miR5379, miR5380, miR5382, miR5565, miR5667, miR5679, miR5761, miR5762, miR5763, miR5764, miR5765, miR5766, miR5767, miR5768, miR5769, miR5770, miR5771, miR5772, miR5773, miR5774, miR5775, miR5776, miR5777, miR5778, miR5779, miR5780, miR5781, miR5782, miR5783, miR5784, miR5785, miR5786, miR6278, miR6279, miR854, miR9722, miR9723, miR9724, miR9725, miR9726, miR9727, miR9728, miR9729, miR9730, miR9731, miR9732, miR9733, miR9734, miR9735, miR9736, miR9737, miR9738, miR9739, miR9740, miR9741, miR9742, miR9743, miR9744, miR9745, miR9746, miR9747, miR9748, miR9749, miR9750, miR9751, miR9752, miR9753, miR9754, miR9755, miR9756, miR9757, miR9758, miR9759, miR9760, miR9761, miR9762, miR9763, miR9764, miR9765, miR9766, miR9767 | miR1023, miR1046, miR1127, miR1128, miR1133, miR1436, miR1439, miR2680, miR2919, miR5238 |
| ***Medicago truncatula*** | miR1435, miR2086, miR2087, miR2088, miR2199, miR2275, miR2585, miR2586, miR2587, miR2588, miR2589, miR2590, miR2591, miR2592, miR2593, miR2594, miR2595, miR2597, miR2598, miR2599, miR2600, miR2601, miR2602, miR2603, miR2604, miR2605, miR2606, miR2607, miR2608, miR2609, miR2610, miR2611, miR2612, miR2613, miR2614, miR2615, miR2617, miR2618, miR2619, miR2620, miR2621, miR2622, miR2623, miR2624, miR2625, miR2626, miR2627, miR2628, miR2629, miR2631, miR2632, miR2633, miR2634, miR2635, miR2636, miR2637, miR2638, miR2639, miR2640, miR2641, miR2642, miR2643, miR2644, miR2645, miR2646, miR2647, miR2648, miR2649, miR2650, miR2651, miR2652, miR2653, miR2654, miR2655, miR2656, miR2657, miR2658, miR2659, miR2660, miR2661, miR2662, miR2663, miR2664, miR2665, miR2666, miR2667, miR2668, miR2669, miR2670, miR2671, miR2672, miR2674, miR2675, miR2676, miR2677, miR2678, miR2679, miR5014, miR5079, miR5175, miR5204, miR5206, miR5207, miR5208, miR5209, miR5210, miR5211, miR5212, miR5213, miR5214, miR5215, miR5216, miR5217, miR5218, miR5219, miR5221, miR5222, miR5223, miR5224, miR5226, miR5227, miR5228, miR5229, miR5230, miR5231, miR5232, miR5233, miR5234, miR5235, miR5236, miR5237, miR5239, miR5240, miR5241, miR5242, miR5243, miR5244, miR5245, miR5246, miR5247, miR5248, miR5249, miR5250, miR5251, miR5252, miR5253, miR5254, miR5255, miR5256, miR5257, miR5258, miR5259, miR5260, miR5261, miR5262, miR5263, miR5264, miR5265, miR5266, miR5267, miR5268, miR5269, miR5270, miR5271, miR5272, miR5273, miR5274, miR5275, miR5276, miR5277, miR5278, miR5279, miR5280, miR5282, miR5283, miR5284, miR5285, miR5286, miR5287, miR5288, miR5289, miR5290, miR5291, miR5292, miR5293, miR5294, miR5295, miR5296, miR5297, miR5298, miR5299, miR5382, miR5554, miR5555, miR5556, miR5557, miR5558, miR5560, miR5561, miR5562, miR5563, miR5740, miR5741, miR5742, miR5743, miR5744, miR5745, miR5746, miR5747, miR5748, miR5749, miR5750, miR5751, miR5752, miR5753, miR5754, miR5755, miR5756, miR5757, miR5758, miR5759, miR5760, miR7696, miR7697, miR7698, miR7699, miR7700, miR7701, miR822, miR830, miR864 | miR865, miR902, miR862, miR847, miR838, miR828, miR5658, miR5369, miR5142, miR4376, miR403, miR394, miR1860, miR170, miR1534, miR1511, miR1088 |
| **node 6 to node1** | miR1886, miR1919, miR5303, miR5304 | miR865, miR862, miR828, miR5369, miR5238, miR5225, miR5142, miR472, miR2633, miR2590, miR2111, miR2118, miR170, miR1511, miR1023 |
| ***Solanum tubresom*** | miR1030, miR1886, miR2089, miR2923, miR3441, miR3520, miR384, miR5786, miR6022, miR6023, miR6024, miR6025, miR6026, miR6027, miR6149, miR7979, miR7980, miR7981, miR7982, miR7983, miR7984, miR7985, miR7986, miR7987, miR7988, miR7989, miR7990, miR7991, miR7992, miR7993, miR7994, miR7995, miR7996, miR7997, miR7998, miR7999, miR8000, miR8001, miR8002, miR8003, miR8004, miR8005, miR8006, miR8007, miR8008, miR8009, miR8010, miR8011, miR8012, miR8013, miR8014, miR8015, miR8016, miR8017, miR8018, miR8019, miR8020, miR8021, miR8022, miR8023, miR8024, miR8025, miR8026, miR8027, miR8028, miR8029, miR8030, miR8031, miR8032, miR8033, miR8034, miR8035, miR8036, miR8037, miR8038, miR8039, miR8040, miR8041, miR8042, miR8043, miR8044, miR8045, miR8046, miR8047, miR8048, miR8049, miR8050, miR8051 | miR902, miR838, miR4344, miR403, miR394, miR2218, miR1860, miR159, miR1534, miR1439, miR1046 |
| ***Solanum lycopersicum*** | miR9469, miR9470, miR9471, miR9472, miR9473, miR9474, miR9475, miR9476, miR9477, miR780, miR5302, miR5300, miR437, miR2868, miR1917, miR1918 | miR1127, miR1133, miR1436, miR1533, miR2680, miR3627, miR393, miR398, miR408, miR414, miR479, miR5205, miR529, miR530, miR5658, miR7122, miR827, miR847 |
